# Supplementary material
Source: PubMed Central journal article supplement (PMC5555296)

## **SUPPORTING INFORMATION**

### **An adductomics pipeline for untargeted analysis of modifications to Cys34 of human serum albumin**

Hasmik Grigoryan<sup>1</sup>, William Edmands<sup>1</sup>, Sixin S. Lu<sup>1</sup>, Yukiko Yano<sup>1</sup>, Luca Regazzoni<sup>1</sup>, Anthony T. Iavarone<sup>2</sup>, Evan R. Williams<sup>3</sup> and Stephen M. Rappaport\*<sup>1</sup>

<sup>1</sup> School of Public Health, University of California, Berkeley, California 94720-7356, United States

<sup>2</sup> California Institute for Quantitative Biosciences, University of California, Berkeley, California 94720, United States

<sup>3</sup> College of Chemistry, University of California, Berkeley, California 94720, United States

\*To whom correspondence should be addressed: Prof. S. M. Rappaport, School of Public Health, University of California, Berkeley, CA 94720-7356, USA. Tel: 1-510-642-4355; Fax: 1-510-642-0427; E-mail: [srappaport@berkeley.edu](mailto:srappaport@berkeley.edu).

**Table S1. Characteristics and estimated intake of dietary fat across subjects represented by 34 pooled plasma samples.**

| Characteristics of Pooled Samples <sup>a</sup> | Race                 |                       |                              | Gender                |                      |                              | Smoking Status        |                     |                              |
|------------------------------------------------|----------------------|-----------------------|------------------------------|-----------------------|----------------------|------------------------------|-----------------------|---------------------|------------------------------|
|                                                | Black (B)            | White (W)             | <i>P</i> -value <sup>c</sup> | Male (M)              | Female (F)           | <i>P</i> -value <sup>c</sup> | Smoker (S)            | Non-Smoker (NS)     | <i>P</i> -value <sup>c</sup> |
| Number of subjects                             | 18 (9M, 9F; 9S, 9NS) | 17 (9M, 8F; 10S, 7NS) |                              | 18 (9B, 9W; 10S, 8NS) | 17 (9B, 8W; 9S, 8NS) |                              | 19 (10M, 9F; 9B, 10W) | 16 (8M, 8F; 9B, 7W) |                              |
| Age (y)                                        | 26 ± 2               | 25 ± 2                | 0.148                        | 26 ± 3                | 25 ± 2               | 0.627                        | 26 ± 3                | 25 ± 2              | 0.516                        |
| BMI (kg/m <sup>2</sup> )                       | 28.0 ± 3.56          | 24.1 ± 1.64           | 2.20E-04                     | 25.7 ± 2.21           | 26.6 ± 4.35          | 0.41                         | 26.9 ± 3.94           | 25.2 ± 2.42         | 0.143                        |
| Animal Fat (g/day) b                           | 59.7 ± 21.82         | 39.2 ± 9.84           | 1.38E-03                     | 54.3 ± 22.47          | 45.0 ± 15.78         | 0.168                        | 57.9 ± 22.03          | 40.1 ± 11.01        | 5.91E-03                     |
| Vegetable Fat (g/day) b                        | 39.2 ± 14.5          | 27.3 ± 5.67           | 3.77E-03                     | 35.0 ± 13.0           | 31.7 ± 12.1          | 0.431                        | 38.9 ± 14.0           | 26.9 ± 6.17         | 3.34E-03                     |

<sup>a</sup> Between 4 and 6 individual plasma specimens were pooled by race, gender and smoking status.

<sup>b</sup> Dietary fats and fatty acids were compiled from standardized food frequency questionnaires applied to individual subjects and averaged for pooled-plasma specimens in the current investigation.

<sup>c</sup> Based on Student's *t*-test.

**Table S2.** Evidence used to annotate putative T3 adducts. Accurate masses for 32 adducts led to reasonable elemental compositions added to the thiol of Cys34 in the T3 peptide within three ppm of theoretical values. Annotations of adducts are based on calculated accurate masses, MS2 spectra, literature and database searches and include several classes of modifications. Monoisotopic masses and chromatographic elution times of eleven adducts were confirmed by their synthetic standards. Twenty one adducts were previously reported in the literature as adducts of Cys34, glutathione or other thiols. Database references contain accession numbers from Unimod ([www.unimod.org](http://www.unimod.org)), UniProt ([www.uniprot.org](http://www.uniprot.org)) and PubChem (<https://pubchem.ncbi.nlm.nih.gov>).

| Adduct | Annotation                    | Synthetic Standard | Database references | Published references *                                                     | Proteins reported modified                                                                               | Notes                                                                                     |
|--------|-------------------------------|--------------------|---------------------|----------------------------------------------------------------------------|----------------------------------------------------------------------------------------------------------|-------------------------------------------------------------------------------------------|
| A1     | Cys34→Gly                     |                    | UNIMOD #552         | PMID: 15063314,<br>PMID: 21075673                                          | serum transthyretin, papain                                                                              |                                                                                           |
| A2     | Cys34→Dehydroalanine          |                    | UNIMOD #368         | PMID: 15063314,<br>PMID: 18265430, 1<br>PMID: 18722427,<br>PMID: 17450134, | serum transthyretin, serum albumin, synthetic peptides<br>recombinant proteins, papain,<br>serum albumin |                                                                                           |
| A3     | Cys34→Oxalanine/Formylglycine |                    | UNIMOD #402         | PMID: 25514000,<br>PMID: 21075673,<br>PMID: 19575405                       |                                                                                                          |                                                                                           |
| A4     | Not Cys34 adduct              |                    |                     |                                                                            |                                                                                                          | $\gamma 7^{2+}$ or/and $\gamma 7^+$ were not detected in MS2. $b14^+$ was detected in MS2 |
| A5     | Not Cys34 adduct              |                    |                     |                                                                            |                                                                                                          | $\gamma 7^{2+}$ or/and $\gamma 7^+$ were not detected in MS2. $b14^+$ was detected in MS2 |
| A6     | T3 Labile adduct              |                    |                     | 1                                                                          | synthetic peptides                                                                                       |                                                                                           |
| A7     | Unmodified T3                 | +                  |                     |                                                                            |                                                                                                          |                                                                                           |
| A8     | T3 Dimer                      | +                  |                     |                                                                            |                                                                                                          |                                                                                           |
| A9     | Cys34-Gln crosslink           | +                  | UniProt: KW-0882    | PMID: 22591159,<br>PMID: 20729215,<br>PMID: 24220033                       | serum albumin, pilus adhesin from <i>Streptococcus pyogenes</i>                                          |                                                                                           |
| A10    | Methylation (not Cys34)       |                    | UNIMOD #34          |                                                                            |                                                                                                          |                                                                                           |
| A11    | Cyanide adduct                |                    | UNIMOD #438         | PMID: 24916017,<br>PMID: 21366342,<br>PMID: 21148632                       | Glyceraldehyde-3-phosphate Dehydrogenase (GAPDH),<br>serum albumin                                       |                                                                                           |

|     |                          |   |             |                                                                                           |                                                                       |                                                                                                           |
|-----|--------------------------|---|-------------|-------------------------------------------------------------------------------------------|-----------------------------------------------------------------------|-----------------------------------------------------------------------------------------------------------|
| A12 | Cys34 Sulfinic acid      | + | UNIMOD #425 | PMID: 24916017,<br>PMID: 21148632,<br>PMID: 24416365                                      | serum albumin,<br>Glyceraldehyde-3-phosphate<br>Dehydrogenase (GAPDH) |                                                                                                           |
| A13 | Not Cys34 adduct         |   |             |                                                                                           |                                                                       | y7 <sup>2+</sup> or/and y7 <sup>+</sup> were not detected<br>in MS2. b14 <sup>+</sup> was detected in MS2 |
| A14 | Ethylene oxide adduct    |   |             | PMID: 25407640                                                                            | recombinant human serum<br>albumin                                    |                                                                                                           |
| A15 | Cys34 Sulfonic acid      | + | UNIMOD #345 | PMID: 24916017,<br>PMID: 21148632,<br>PMID: 24416365                                      | serum albumin,<br>Glyceraldehyde-3-phosphate<br>Dehydrogenase (GAPDH) |                                                                                                           |
| A16 | Not Cys34 adduct         |   |             |                                                                                           |                                                                       | y7 <sup>2+</sup> or/and y7 <sup>+</sup> were not detected<br>in MS2. b14 <sup>+</sup> was detected in MS2 |
| A17 | Not Cys34 adduct         |   |             |                                                                                           |                                                                       | y7 <sup>2+</sup> or/and y7 <sup>+</sup> were not detected<br>in MS2. b14 <sup>+</sup> was detected in MS2 |
| A18 | Acrylonitrile adduct     |   |             | PMID: 10563837,<br>PMID: 22231508,<br>PMID: 5656374                                       | Glutathione, wheat gluten,<br>bovine serum albumin                    |                                                                                                           |
| A19 | Na adduct of A12         |   | UNIMOD #30  | PMID: 16444685                                                                            | synthetic peptides                                                    |                                                                                                           |
| A20 | Methylisocyanate adduct  |   |             | PMID: 2302207                                                                             | glutathione                                                           |                                                                                                           |
| A21 | Methylvinylketone adduct |   |             | PMID: 25087629,<br>PMID: 1897958, PMID:<br>22084934                                       | Glutathione, Glyceraldehyde-3-<br>phosphate                           |                                                                                                           |
| A22 | S-Mercaptoacetamide      |   | CID: 12961  |                                                                                           | Dehydrogenase (GAPDH)                                                 |                                                                                                           |
| A23 | S-Mercaptoacetic acid    |   | CID: 1133   |                                                                                           |                                                                       |                                                                                                           |
| A24 | S-Cys (-H2O)             | + | UNIMOD #23  | PMID: 25800200                                                                            | synthetic peptides                                                    |                                                                                                           |
| A25 | Unknown                  |   |             |                                                                                           |                                                                       |                                                                                                           |
| A26 | Unknown                  |   |             |                                                                                           |                                                                       |                                                                                                           |
| A27 | Unknown                  |   |             |                                                                                           |                                                                       |                                                                                                           |
| A28 | S-hCys (-H2O)            |   | UNIMOD #23  | PMID: 25800200<br>PMID: 24416365,<br>PMID: 23215783,<br>PMID: 15791656,<br>PMID: 18624771 | synthetic peptides<br>human serum albumin                             |                                                                                                           |
| A29 | S-Cys                    |   |             | 2                                                                                         |                                                                       |                                                                                                           |
| A30 | S-Cys (NH2→OH)           |   |             |                                                                                           |                                                                       |                                                                                                           |
| A31 | Unknown                  |   |             |                                                                                           |                                                                       |                                                                                                           |
| A32 | S-hCys                   | + |             | PMID: 17285228,                                                                           | serum albumin,                                                        |                                                                                                           |

|     |                               |   |  |              |                                                                         |                        |                                                                                                           |
|-----|-------------------------------|---|--|--------------|-------------------------------------------------------------------------|------------------------|-----------------------------------------------------------------------------------------------------------|
| A33 | S-hCys                        |   |  | UNIMOD #1271 | PMID: 17760510,<br>PMID: 16395265,<br>PMID: 18624771,<br>PMID: 26658763 | metallothionein, serum |                                                                                                           |
| A34 | Unknown                       |   |  |              |                                                                         |                        |                                                                                                           |
| A35 | Na adduct of A29              |   |  |              | PMID: 16444685                                                          |                        |                                                                                                           |
| A36 | Not Cys34 adduct              |   |  |              |                                                                         |                        | y7 <sup>2+</sup> or/and y7 <sup>+</sup> were not detected<br>in MS2. b14 <sup>+</sup> was detected in MS2 |
| A37 | K adduct of A29               |   |  |              |                                                                         |                        |                                                                                                           |
| A38 | S-Cys-Gly (-H <sub>2</sub> O) |   |  | UNIMOD #23   | PMID: 25800200                                                          | synthetic peptides     |                                                                                                           |
| A39 | S-(N -acetyl)Cys              |   |  |              | PMID: 15499198                                                          | human serum albumin    |                                                                                                           |
| A40 | S-Cys-Gly                     | + |  |              | PMID: 18624771,<br>PMID: 1632485                                        | human serum albumin    |                                                                                                           |
| A41 | Not Cys34 adduct              |   |  |              |                                                                         |                        | y7 <sup>2+</sup> or/and y7 <sup>+</sup> were not detected<br>in MS2. b14 <sup>+</sup> was detected in MS2 |
| A42 | S-γ-Gln-Cys                   |   |  |              | PMID: 24738021                                                          | human serum albumin    |                                                                                                           |
| A43 | S-Glutathione                 |   |  | UNIMOD #55   | PMID: 18624771,<br>PMID: 1632485                                        | human serum albumin    |                                                                                                           |

\* Citations:

- 1 Jianyong Wu-PhD thesis 2009/ Tandem Mass Spectrometric Analysis of Protein and Peptide Adducts of Lipid Peroxidation-Derived Aldehydes
- 2 <http://www.ionsource.com/Card/Deamidation/mono0001.htm>

**Table S3. Covariance parameters for mixed models  
(performed with natural logarithms of peak-area ratios) and estimated CVs.**

CovParm' refers to the covariance parameter for the mixed model.

ID' refers to the between-specimen variance component

Residual' refers to the within-specimen variance component (error variance)

CV' refers to the coefficient variation estimated from the within-specimen variance component

Variable is  $\ln(\text{peak area adduct} \cdot 1000 / \text{peak area housekeeping peptide})$

| Adduct | CovParm  | Subject | Estimate | CV       |
|--------|----------|---------|----------|----------|
| 1      | ID       | ID      | 0.007431 |          |
| 1      | Residual |         | 0.1788   | 0.442472 |
| 2      | ID       | ID      | 0        |          |
| 2      | Residual |         | 0.1288   | 0.37076  |
| 3      | ID       | ID      | 0.2064   |          |
| 3      | Residual |         | 0.2041   | 0.475837 |
| 4      | ID       | ID      | 0        |          |
| 4      | Residual |         | 0.3211   | 0.61534  |
| 5      | ID       | ID      | 0.01576  |          |
| 5      | Residual |         | 0.1574   | 0.412873 |
| 6      | ID       | ID      | 0.02108  |          |
| 6      | Residual |         | 0.08073  | 0.289962 |
| 7      | ID       | ID      | 0.09397  |          |
| 7      | Residual |         | 0.1066   | 0.335394 |
| 8      | ID       | ID      | 0.09089  |          |
| 8      | Residual |         | 1.0419   | 1.354473 |
| 9      | ID       | ID      | 0.02888  |          |
| 9      | Residual |         | 0.07329  | 0.275758 |
| 10     | ID       | ID      | 0.2159   |          |
| 10     | Residual |         | 0.2709   | 0.557803 |
| 11     | ID       | ID      | 0.2552   |          |
| 11     | Residual |         | 0.1288   | 0.37076  |
| 12     | ID       | ID      | 0.02255  |          |
| 12     | Residual |         | 0.08476  | 0.297415 |
| 13     | ID       | ID      | 0        |          |
| 13     | Residual |         | 0.101    | 0.326001 |
| 14     | ID       | ID      | 0.1335   |          |
| 14     | Residual |         | 0.07254  | 0.274291 |
| 15     | ID       | ID      | 0.08514  |          |
| 15     | Residual |         | 0.09789  | 0.320689 |
| 16     | ID       | ID      | 0.3442   |          |
| 16     | Residual |         | 0.396    | 0.697043 |
| 17     | ID       | ID      | 0.007284 |          |
| 17     | Residual |         | 0.2534   | 0.537027 |
| 18     | ID       | ID      | 0.2221   |          |
| 18     | Residual |         | 0.09907  | 0.322713 |

|             |    |          |          |
|-------------|----|----------|----------|
| 19 ID       | ID | 0.1866   |          |
| 19 Residual |    | 0.05752  | 0.243324 |
| 20 ID       | ID | 0.000045 |          |
| 20 Residual |    | 0.006651 | 0.081689 |
| 21 ID       | ID | 0.01044  |          |
| 21 Residual |    | 0.1809   | 0.445304 |
| 22 ID       | ID | 0.01105  |          |
| 22 Residual |    | 0.09973  | 0.32384  |
| 23 ID       | ID | 0.05202  |          |
| 23 Residual |    | 0.07186  | 0.272956 |
| 24 ID       | ID | 0        |          |
| 24 Residual |    | 0.1009   | 0.325831 |
| 25 ID       | ID | 0.3888   |          |
| 25 Residual |    | 0.3133   | 0.606574 |
| 26 ID       | ID | 0.144    |          |
| 26 Residual |    | 0.08373  | 0.295525 |
| 27 ID       | ID | 0.1256   |          |
| 27 Residual |    | 0.07608  | 0.281156 |
| 28 ID       | ID | 0.06713  |          |
| 28 Residual |    | 0.1579   | 0.413581 |
| 29 ID       | ID | 0.00438  |          |
| 29 Residual |    | 0.05193  | 0.230872 |
| 30 ID       | ID | 0.04683  |          |
| 30 Residual |    | 0.06135  | 0.251537 |
| 31 ID       | ID | 0.07844  |          |
| 31 Residual |    | 0.1426   | 0.391495 |
| 32 ID       | ID | 0        |          |
| 32 Residual |    | 0.6284   | 0.935205 |
| 33 ID       | ID | 0.0389   |          |
| 33 Residual |    | 0.06382  | 0.256711 |
| 34 ID       | ID | 0.1894   |          |
| 34 Residual |    | 0.1172   | 0.352625 |
| 35 ID       | ID | 0.02206  |          |
| 35 Residual |    | 0.2132   | 0.487475 |
| 36 ID       | ID | 0.1587   |          |
| 36 Residual |    | 0.3216   | 0.6159   |
| 37 ID       | ID | 0.01711  |          |
| 37 Residual |    | 0.2098   | 0.483147 |
| 38 ID       | ID | 0.09685  |          |
| 38 Residual |    | 0.2378   | 0.518127 |
| 39 ID       | ID | 0.1692   |          |
| 39 Residual |    | 0.1002   | 0.324641 |
| 40 ID       | ID | 0.01503  |          |
| 40 Residual |    | 0.05735  | 0.242954 |
| 41 ID       | ID | 0.05769  |          |
| 41 Residual |    | 0.1852   | 0.451064 |
| 42 ID       | ID | 0        |          |

|             |    |         |          |
|-------------|----|---------|----------|
| 42 Residual |    | 0.07828 | 0.285351 |
| 43 ID       | ID | 0.05674 |          |
| 43 Residual |    | 0.09891 | 0.322439 |



**Table S4. P-values for 2-sided Wilcoxon (exact) tests  
for smoke, race, gender**

| <b>smoke</b> |         | <b>Bonferroni adjusted P-value (0.05/34=0.00147)</b> |  |
|--------------|---------|------------------------------------------------------|--|
| Adduct       | P-value | <b>0=Not Sig,1=Sig</b>                               |  |
| A1           | 0.08286 | 0                                                    |  |
| A3           | 0.97082 | 0                                                    |  |
| A5           | 0.22808 | 0                                                    |  |
| A6           | 0.25613 | 0                                                    |  |
| A7           | 0.86416 | 0                                                    |  |
| A8           | 0.16747 | 0                                                    |  |
| A9           | 0.01375 | 0                                                    |  |
| A10          | 0.01354 | 0                                                    |  |
| A11          | 0.02502 | 0                                                    |  |
| A12+A19      | 0.00058 | 1                                                    |  |
| A14          | 0       | 1                                                    |  |
| A15          | 0.00503 | 0                                                    |  |
| A16          | 0.10119 | 0                                                    |  |
| A17          | 0.17666 | 0                                                    |  |
| A18          | 0       | 1                                                    |  |
| A20          | 1       | 0                                                    |  |
| A21          | 0.60121 | 0                                                    |  |
| A22          | 0.46658 | 0                                                    |  |
| A23          | 0.58361 | 0                                                    |  |
| A25          | 0.95189 | 0                                                    |  |
| A26          | 0.28442 | 0                                                    |  |
| A27          | 0.80984 | 0                                                    |  |
| A28          | 0.5601  | 0                                                    |  |
| A29+A35+A37  | 0.0012  | 1                                                    |  |
| A30          | 0.65622 | 0                                                    |  |
| A31          | 0.06044 | 0                                                    |  |
| A33          | 0.31896 | 0                                                    |  |
| A34          | 0.03956 | 0                                                    |  |
| A36          | 0.09281 | 0                                                    |  |
| A38          | 0.60741 | 0                                                    |  |
| A39          | 0.0063  | 0                                                    |  |
| A40          | 0.28641 | 0                                                    |  |
| A41          | 0.68065 | 0                                                    |  |
| A43          | 0.73213 | 0                                                    |  |
| <b>race</b>  |         |                                                      |  |
| Adduct       | P-value |                                                      |  |
| A1           | 0.9188  | 0                                                    |  |
| A3           | 0.56038 | 0                                                    |  |
| A5           | 0.27429 | 0                                                    |  |

|            |         |   |
|------------|---------|---|
| A6         | 0.04103 | 0 |
| A7         | 0.20538 | 0 |
| A8         | 0.94581 | 0 |
| A9         | 0.97289 | 0 |
| A10        | 0.65157 | 0 |
| A11        | 0.51772 | 0 |
| A12+A19    | 0.37528 | 0 |
| A14        | 0.88672 | 0 |
| A15        | 0.25941 | 0 |
| A16        | 0.09604 | 0 |
| A17        | 0.60227 | 0 |
| A18        | 0.66206 | 0 |
| A20        | 0.72495 | 0 |
| A21        | 0.75323 | 0 |
| A22        | 0.86706 | 0 |
| A23        | 0.13089 | 0 |
| A25        | 0.97924 | 0 |
| A26        | 0.19656 | 0 |
| A27        | 0.16865 | 0 |
| A28        | 0.03434 | 0 |
| A29+A35+37 | 0.78566 | 0 |
| A30        | 0.89187 | 0 |
| A31        | 0.20538 | 0 |
| A33        | 0.47446 | 0 |
| A34        | 0.00539 | 0 |
| A36        | 0.25506 | 0 |
| A38        | 0.07886 | 0 |
| A39        | 0.03413 | 0 |
| A40        | 0.56289 | 0 |
| A41        | 0.39323 | 0 |
| A43        | 0.20538 | 0 |

**gender**

| Adduct  | P-value |   |
|---------|---------|---|
| A1      | 0.29683 | 0 |
| A3      | 0.15742 | 0 |
| A5      | 0.22382 | 0 |
| A6      | 0.77225 | 0 |
| A7      | 0.67023 | 0 |
| A8      | 0.57382 | 0 |
| A9      | 0.42243 | 0 |
| A10     | 0.91272 | 0 |
| A11     | 0.93218 | 0 |
| A12+A19 | 0.85147 | 0 |
| A14     | 0.57991 | 0 |
| A15     | 0.4632  | 0 |
| A16     | 0.32941 | 0 |

|             |         |   |
|-------------|---------|---|
| A17         | 0.23015 | 0 |
| A18         | 0.62231 | 0 |
| A20         | 1       | 0 |
| A21         | 0.87173 | 0 |
| A22         | 0.40176 | 0 |
| A23         | 0.52815 | 0 |
| A25         | 0.73816 | 0 |
| A26         | 0.30581 | 0 |
| A27         | 0.31587 | 0 |
| A28         | 0.23716 | 0 |
| A29+A35+A37 | 0.98642 | 0 |
| A30         | 0.22382 | 0 |
| A31         | 0.87825 | 0 |
| A33         | 0.82486 | 0 |
| A34         | 0.40284 | 0 |
| A36         | 0.74854 | 0 |
| A38         | 0.93218 | 0 |
| A39         | 0.52742 | 0 |
| A40         | 0.38379 | 0 |
| A41         | 0.31228 | 0 |
| A43         | 0.28112 | 0 |

**Table S5**  
**Multivariable regression of adduct PARs (adduct peak area\*1000/housekeeping-peptide peak area, in natural scale).**  
**Reference groups for dichotomous covariates: smoke (0=ns), race (0=AW), gender (0=F)**  
**Units for continuous covariates (mean value for each pooled specimen): mnbmi (kg/m<sup>2</sup>), mmaf (g/d), mmfat (g/d)**

**Adduct 1**  
The REG Procedure  
Model: MODEL1  
Dependent Variable: A1

| Analysis of Variance |         | DF       | Sum of Squares | Mean Square | F Value | Pr > F |
|----------------------|---------|----------|----------------|-------------|---------|--------|
| Model                |         | 1        | 0.000213       | 0.000213    | 6.67    | 0.0146 |
| Error                |         | 32       | 0.00102        | 3.19E-05    |         |        |
| Corrected Total      |         | 33       | 0.00124        |             |         |        |
| Root MSE             | 0.00565 | R-Square | 0.1724         |             |         |        |
| Dependent Mean       | 0.29506 | Adj R-Sq | 0.1466         |             |         |        |
| Coeff Var            | 1.91541 |          |                |             |         |        |

  

| Variable  | DF | Parameter Estimate | Standard Error | t Value | Pr >  t | Squared Semi-partial Corr Type I | 95% Confidence Limits |          |
|-----------|----|--------------------|----------------|---------|---------|----------------------------------|-----------------------|----------|
| Intercept | 1  | 0.30172            | 0.00276        | 109.38  | <.0001  | 0.29611                          | 0.30734               |          |
| mmaf      | 1  | -0.0002            | 7.79E-05       | -2.58   | 0.0146  | 0.17244                          | -0.00036              | -4.2E-05 |

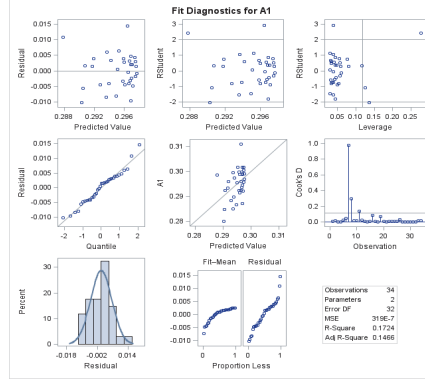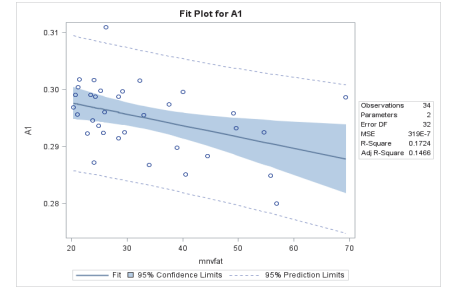

**Adduct 5**  
The REG Procedure  
Model: MODEL1  
Dependent Variable: A5

| Analysis of Variance |         | DF       | Sum of Squares | Mean Square | F Value | Pr > F |
|----------------------|---------|----------|----------------|-------------|---------|--------|
| Model                |         | 4        | 0.03357        | 0.00839     | 3.21    | 0.0268 |
| Error                |         | 29       | 0.07584        | 0.00262     |         |        |
| Corrected Total      |         | 33       | 0.10941        |             |         |        |
| Root MSE             | 0.05114 | R-Square | 0.3068         |             |         |        |
| Dependent Mean       | 1.29029 | Adj R-Sq | 0.2112         |             |         |        |
| Coeff Var            | 3.9633  |          |                |             |         |        |

  

| Variable  | DF | Parameter Estimate | Standard Error | t Value | Pr >  t | Squared Semi-partial Corr Type I | 95% Confidence Limits |          |
|-----------|----|--------------------|----------------|---------|---------|----------------------------------|-----------------------|----------|
| Intercept | 1  | 1.402              | 0.07153        | 19.6    | <.0001  | 1.25569                          | 1.5483                |          |
| Smoke     | 1  | -0.04392           | 0.02003        | -2.19   | 0.0365  | 0.04502                          | -0.08488              | 0.00296  |
| Gender    | 1  | -0.01932           | 0.01877        | -2.09   | 0.045   | 0.02712                          | -0.07771              | -0.00093 |
| mnbmi     | 1  | -0.00573           | 0.00291        | -1.97   | 0.059   | 0.02043                          | -0.01168              | 0.000232 |
| mmaf      | 1  | 0.00166            | 0.000555       | 2.99    | 0.0056  | 0.21427                          | 0.000527              | 0.00028  |

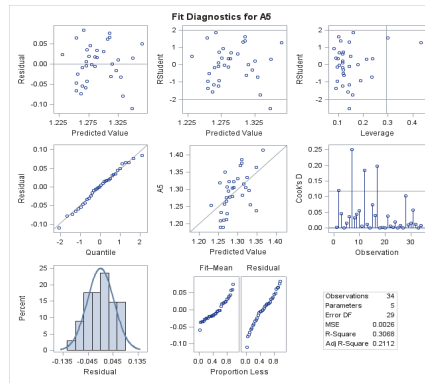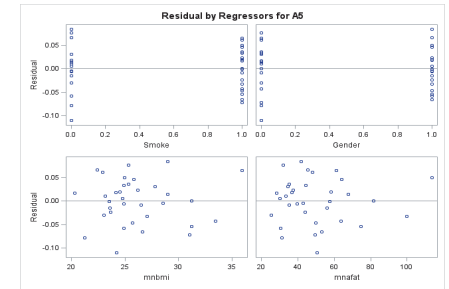

**Adduct 6**  
The REG Procedure  
Model: MODEL1  
Dependent Variable: A6

| Analysis of Variance |         | DF       | Sum of Squares | Mean Square | F Value | Pr > F |
|----------------------|---------|----------|----------------|-------------|---------|--------|
| Model                |         | 2        | 0.50267        | 0.25134     | 6.67    | 0.0039 |
| Error                |         | 31       | 1.1676         | 0.03766     |         |        |
| Corrected Total      |         | 33       | 1.67027        |             |         |        |
| Root MSE             | 0.19407 | R-Square | 0.301          |             |         |        |
| Dependent Mean       | 3.15093 | Adj R-Sq | 0.2559         |             |         |        |
| Coeff Var            | 6.363   |          |                |             |         |        |

  

| Variable  | DF | Parameter Estimate | Standard Error | t Value | Pr >  t | Squared Semi-partial Corr Type I | 95% Confidence Limits |         |
|-----------|----|--------------------|----------------|---------|---------|----------------------------------|-----------------------|---------|
| Intercept | 1  | 2.96724            | 0.09647        | 30.76   | <.0001  | 2.77049                          | 3.16399               |         |
| mmaf      | 1  | 0.01127            | 0.00309        | 3.65    | 0.001   | 0.10369                          | 0.00497               | 0.01757 |
| mmfat     | 1  | -0.0145            | 0.0049         | -2.96   | 0.0059  | 0.19726                          | -0.02449              | -0.0045 |

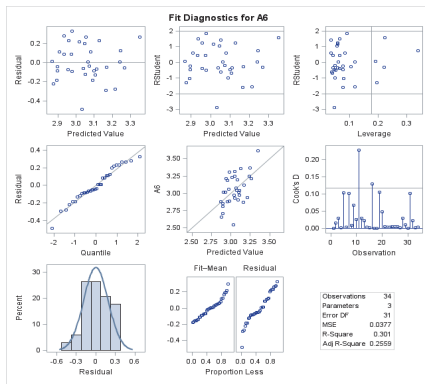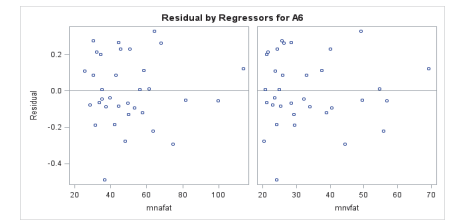

**Adduct 9**  
The REG Procedure  
Model: MODEL1  
Dependent Variable: A9

| Analysis of Variance |         | DF       | Sum of Squares | Mean Square | F Value | Pr > F |
|----------------------|---------|----------|----------------|-------------|---------|--------|
| Model                |         | 2        | 0.61165        | 0.30583     | 5.95    | 0.0065 |
| Error                |         | 31       | 1.59424        | 0.05144     |         |        |
| Corrected Total      |         | 33       | 2.2059         |             |         |        |
| Root MSE             | 0.22678 | R-Square | 0.2773         |             |         |        |
| Dependent Mean       | 2.61768 | Adj R-Sq | 0.2307         |             |         |        |
| Coeff Var            | 8.66322 |          |                |             |         |        |

  

| Variable  | DF | Parameter Estimate | Standard Error | t Value | Pr >  t | Squared Semi-partial Corr Type I | 95% Confidence Limits |          |
|-----------|----|--------------------|----------------|---------|---------|----------------------------------|-----------------------|----------|
| Intercept | 1  | 3.29391            | 0.30373        | 10.84   | <.0001  | 2.67444                          | 3.91337               |          |
| Smoke     | 1  | -0.1885            | 0.08128        | -2.32   | 0.0271  | 0.1983                           | -0.35426              | -0.02273 |
| mnbmi     | 1  | -0.02187           | 0.01188        | -1.84   | 0.0753  | 0.07898                          | -0.04611              | 0.00236  |

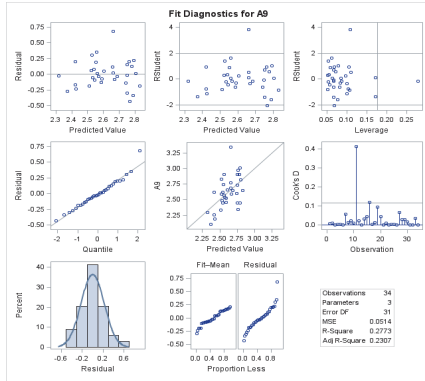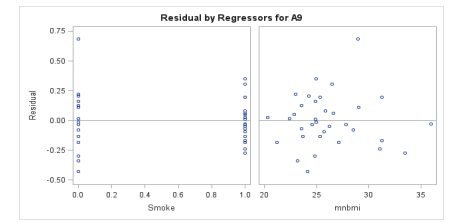

**Adduct 10**

The REG Procedure  
Model: MODEL1  
Dependent Variable: A10

Number of Observations Read 34  
Number of Observations Used 34

| Analysis of Variance |    |                |             |         |
|----------------------|----|----------------|-------------|---------|
| Source               | DF | Sum of Squares | Mean Square | F Value |
| Model                | 4  | 0.16352        | 0.04088     | 4.56    |
| Error                | 29 | 0.26001        | 0.00897     |         |
| Corrected Total      | 33 | 0.42353        |             |         |

Root MSE 0.09469 R-Square 0.3861  
Dependent Mean 0.31119 Adj R-Sq 0.3014  
Coeff Var 30.35886

| Parameter Estimates |    |                    |                |         |
|---------------------|----|--------------------|----------------|---------|
| Variable            | DF | Parameter Estimate | Standard Error | t Value |
| Intercept           | 1  | 0.55768            | 0.1504         | 3.71    |
| Smoke               | 1  | 0.17449            | 0.04305        | 4.05    |
| Race                | 1  | 0.13507            | 0.04687        | 2.88    |
| mmbmi               | 1  | -0.01092           | 0.00639        | -1.71   |
| mmfat               | 1  | -0.0038            | 0.00189        | -2.01   |

| Pr > F | Squared Semi-partial Corr Type I | 95% Confidence Limits |
|--------|----------------------------------|-----------------------|
| 0.0009 | -                                | 0.25008 0.86527       |
| 0.0003 | 0.18807                          | 0.08844 0.26254       |
| 0.0074 | 0.03612                          | 0.03921 0.23093       |
| 0.0981 | 0.07672                          | -0.02398 0.00215      |
| 0.0543 | 0.08518                          | -0.00767 7.44E-05     |

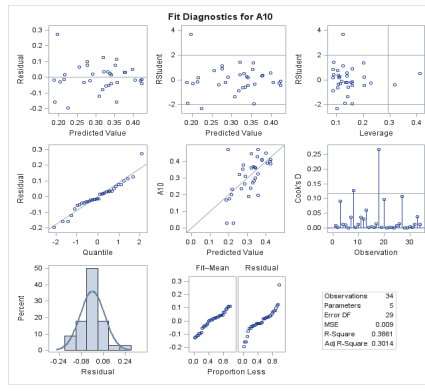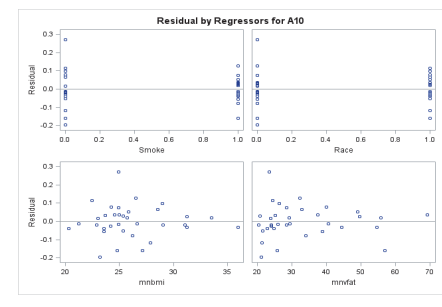

**Adduct 11**

The REG Procedure  
Model: MODEL1  
Dependent Variable: A11

Number of Observations Read 34  
Number of Observations Used 34

| Analysis of Variance |    |                |             |         |
|----------------------|----|----------------|-------------|---------|
| Source               | DF | Sum of Squares | Mean Square | F Value |
| Model                | 2  | 0.13292        | 0.06646     | 5.52    |
| Error                | 31 | 0.3721         | 0.01204     |         |
| Corrected Total      | 33 | 0.50602        |             |         |

Root MSE 0.10971 R-Square 0.2627  
Dependent Mean 0.32374 Adj R-Sq 0.2151  
Coeff Var 33.88719

| Parameter Estimates |    |                    |                |         |
|---------------------|----|--------------------|----------------|---------|
| Variable            | DF | Parameter Estimate | Standard Error | t Value |
| Intercept           | 1  | 0.68971            | 0.14693        | 4.69    |
| Smoke               | 1  | -0.07266           | 0.03932        | -1.85   |
| mmbmi               | 1  | -0.01247           | 0.00575        | -2.17   |

| Pr >  t | Squared Semi-partial Corr Type I | 95% Confidence Limits |
|---------|----------------------------------|-----------------------|
| <.0001  | -                                | 0.39003 0.98938       |
| 0.0742  | 0.15085                          | -0.15285 0.00753      |
| 0.0379  | 0.11184                          | -0.02419 -0.00074     |

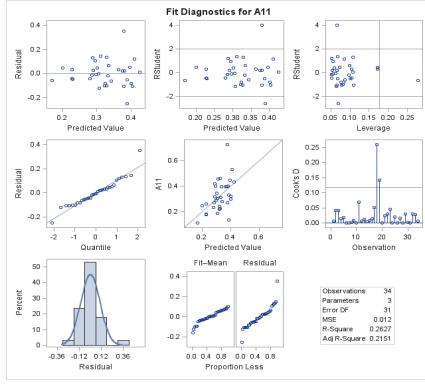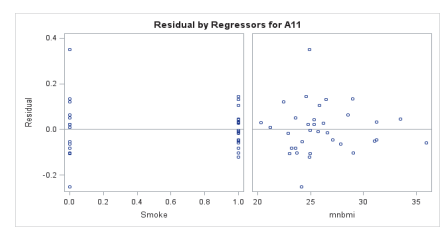

**Adduct (A44-A12-A19)**

The REG Procedure  
Model: MODEL1  
Dependent Variable: A12+A19

Number of Observations Read 34  
Number of Observations Used 34

| Analysis of Variance |    |                |             |         |
|----------------------|----|----------------|-------------|---------|
| Source               | DF | Sum of Squares | Mean Square | F Value |
| Model                | 1  | 0.39003        | 0.39003     | 14.03   |
| Error                | 32 | 0.88935        | 0.02779     |         |
| Corrected Total      | 33 | 1.27938        |             |         |

Root MSE 0.16671 R-Square 0.3049  
Dependent Mean 2.3314 Adj R-Sq 0.2831  
Coeff Var 7.15063

| Parameter Estimates |    |                    |                |         |
|---------------------|----|--------------------|----------------|---------|
| Variable            | DF | Parameter Estimate | Standard Error | t Value |
| Intercept           | 1  | 2.45194            | 0.04304        | 56.96   |
| Smoke               | 1  | -0.21571           | 0.05758        | -3.75   |

| Pr >  t | Squared Semi-partial Corr Type I | 95% Confidence Limits |
|---------|----------------------------------|-----------------------|
| <.0001  | -                                | 2.36426 2.53962       |
| 0.0007  | 0.30486                          | -0.333 -0.09842       |

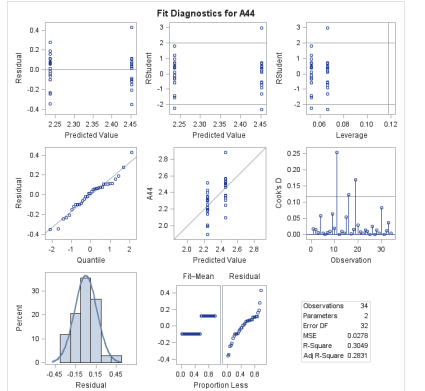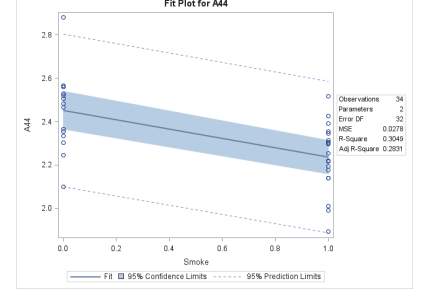

**Adduct A14**

The REG Procedure  
Model: MODEL1  
Dependent Variable: A14

Number of Observations Read 34  
Number of Observations Used 34

| Analysis of Variance |    |                |             |         |
|----------------------|----|----------------|-------------|---------|
| Source               | DF | Sum of Squares | Mean Square | F Value |
| Model                | 3  | 2.23817        | 0.74606     | 92.04   |
| Error                | 30 | 0.24318        | 0.00811     |         |
| Corrected Total      | 33 | 2.48135        |             |         |

Root MSE 0.09003 R-Square 0.902  
Dependent Mean 0.31581 Adj R-Sq 0.8922  
Coeff Var 28.50913

| Parameter Estimates |    |                    |                |         |
|---------------------|----|--------------------|----------------|---------|
| Variable            | DF | Parameter Estimate | Standard Error | t Value |
| Intercept           | 1  | -0.00878           | 0.04272        | -0.21   |
| Smoke               | 1  | 0.47951            | 0.03515        | 13.64   |
| Gender              | 1  | -0.05872           | 0.03205        | -1.83   |
| mmfat               | 1  | 0.00175            | 0.00098        | 1.93    |

| Pr >  t | Squared Semi-partial Corr Type I | 95% Confidence Limits |
|---------|----------------------------------|-----------------------|
| 0.8385  | -                                | -0.09603 0.07846      |
| <.0001  | 0.88363                          | 0.40773 0.55128       |
| 0.0769  | 0.00618                          | -0.12418 0.00673      |
| 0.0629  | 0.01219                          | -0.0001 0.00361       |

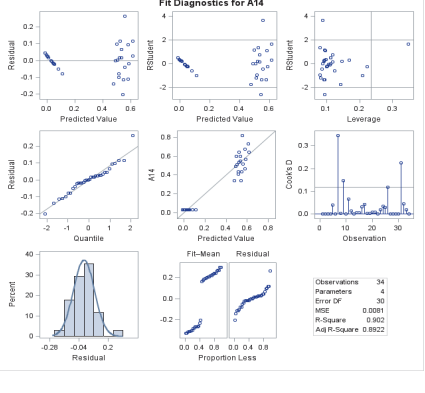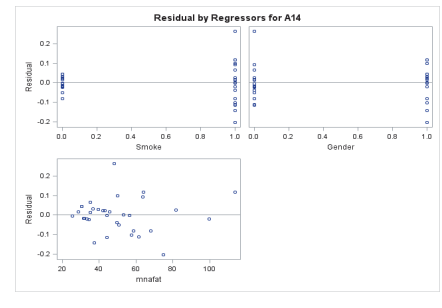

**Adduct 15**

The REG Procedure  
Model: MODEL1  
Dependent Variable: A15

Number of Observations Read 34  
Number of Observations Used 34

| Source          | DF | Sum of Squares | Mean Square | F Value | Pr > F |
|-----------------|----|----------------|-------------|---------|--------|
| Model           | 2  | 0.14228        | 0.07114     | 7.07    | 0.003  |
| Error           | 31 | 0.31201        | 0.01006     |         |        |
| Corrected Total | 33 | 0.4543         |             |         |        |

Root MSE 0.10032 R-Square 0.3132  
Dependent Mean 0.57945 Adj R-Sq 0.2689  
Coeff Var 17.31361

| Variable  | DF | Parameter Estimate | Standard Error | t Value | Pr >  t | Squared Semi-partial Corr Type I | 95% Confidence Limits |
|-----------|----|--------------------|----------------|---------|---------|----------------------------------|-----------------------|
| Intercept | 1  | 0.6775             | 0.03176        | 21.33   | <.0001  | 0.61272                          | 0.74229               |
| Smoke     | 1  | -0.11554           | 0.03471        | -3.33   | 0.0023  | 0.22958                          | -0.18634 -0.04474     |
| Race      | 1  | -0.06697           | 0.03447        | -1.94   | 0.0612  | 0.08361                          | -0.13727 0.00334      |

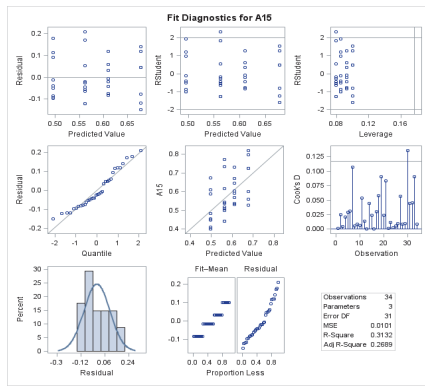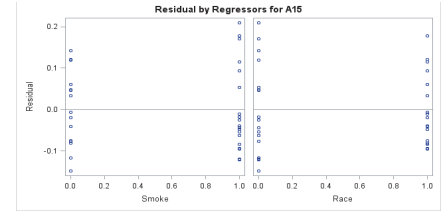

**Adduct 16**

The REG Procedure  
Model: MODEL1  
Dependent Variable: A16

Number of Observations Read 34  
Number of Observations Used 34

| Source          | DF | Sum of Squares | Mean Square | F Value | Pr > F |
|-----------------|----|----------------|-------------|---------|--------|
| Model           | 1  | 0.10132        | 0.10132     | 8.93    | 0.0053 |
| Error           | 32 | 0.36291        | 0.01134     |         |        |
| Corrected Total | 33 | 0.46423        |             |         |        |

Root MSE 0.10049 R-Square 0.2183  
Dependent Mean 0.14675 Adj R-Sq 0.1938  
Coeff Var 72.56817

| Variable  | DF | Parameter Estimate | Standard Error | t Value | Pr >  t | Squared Semi-partial Corr Type I | 95% Confidence Limits |
|-----------|----|--------------------|----------------|---------|---------|----------------------------------|-----------------------|
| Intercept | 1  | 0.5663             | 0.14155        | 4       | 0.0003  | 0.27797                          | 0.85462               |
| mmblmi    | 1  | -0.01607           | 0.00538        | -2.99   | 0.0053  | 0.21825                          | -0.02703 -0.00512     |

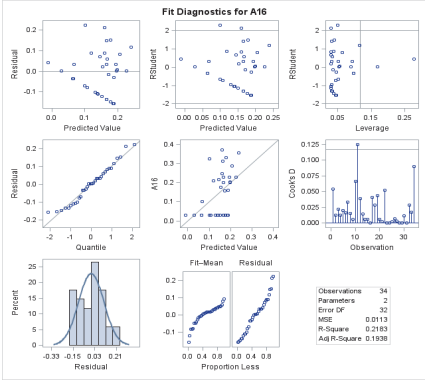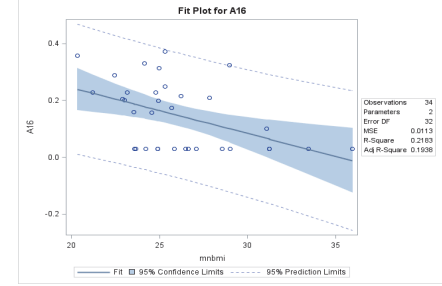

**Adduct 18**

The REG Procedure  
Model: MODEL1  
Dependent Variable: A18

Number of Observations Read 34  
Number of Observations Used 34

| Source          | DF | Sum of Squares | Mean Square | F Value | Pr > F |
|-----------------|----|----------------|-------------|---------|--------|
| Model           | 1  | 0.5281         | 0.5281      | 60.5    | <.0001 |
| Error           | 32 | 0.27931        | 0.00873     |         |        |
| Corrected Total | 33 | 0.80741        |             |         |        |

Root MSE 0.09343 R-Square 0.6541  
Dependent Mean 0.17027 Adj R-Sq 0.6433  
Coeff Var 54.87067

| Variable  | DF | Parameter Estimate | Standard Error | t Value | Pr >  t | Squared Semi-partial Corr Type I | 95% Confidence Limits |
|-----------|----|--------------------|----------------|---------|---------|----------------------------------|-----------------------|
| Intercept | 1  | 0.03               | 0.02412        | 1.24    | 0.2227  | -0.01914                         | 0.07914               |
| Smoke     | 1  | 0.251              | 0.03227        | 7.78    | <.0001  | 0.65407                          | 0.18527 0.31673       |

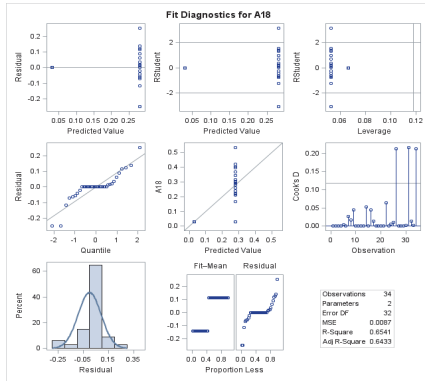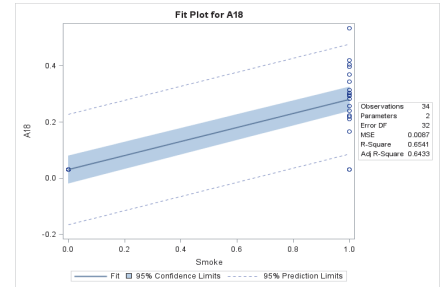

**Adduct 23**

The REG Procedure  
Model: MODEL1  
Dependent Variable: A23

Number of Observations Read 34  
Number of Observations Used 34

| Source          | DF | Sum of Squares | Mean Square | F Value | Pr > F |
|-----------------|----|----------------|-------------|---------|--------|
| Model           | 3  | 0.14486        | 0.04829     | 8.29    | 0.0004 |
| Error           | 30 | 0.17482        | 0.00583     |         |        |
| Corrected Total | 33 | 0.31969        |             |         |        |

Root MSE 0.07634 R-Square 0.4531  
Dependent Mean 0.62652 Adj R-Sq 0.3985  
Coeff Var 12.18444

| Variable  | DF | Parameter Estimate | Standard Error | t Value | Pr >  t | Squared Semi-partial Corr Type I | 95% Confidence Limits |
|-----------|----|--------------------|----------------|---------|---------|----------------------------------|-----------------------|
| Intercept | 1  | 0.92356            | 0.11772        | 7.85    | <.0001  | 0.68815                          | 1.16397               |
| Race      | 1  | 0.09256            | 0.03569        | 2.59    | 0.0145  | 0.12743                          | 0.01968 0.16543       |
| mmblmi    | 1  | -0.01714           | 0.00478        | -3.58   | 0.0012  | 0.20112                          | -0.02691 -0.00737     |
| mmfat     | 1  | 0.00208            | 0.000796       | 2.61    | 0.0138  | 0.12459                          | 0.000456 0.00371      |

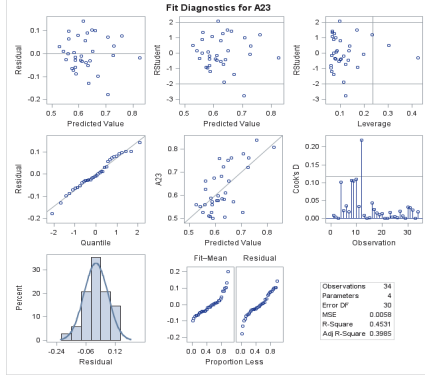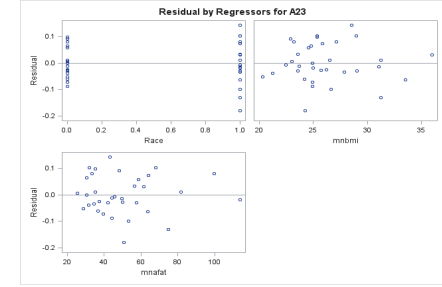

**Adduct 28**

The REG Procedure  
 Model: MODEL1  
 Dependent Variable: A28

Number of Observations Read 34  
 Number of Observations Used 34

| Analysis of Variance |          | Sum of Squares | Mean Square | F Value | Pr > F |
|----------------------|----------|----------------|-------------|---------|--------|
| Source               | DF       |                |             |         |        |
| Model                | 1        | 0.02593        | 0.02593     | 7.23    | 0.0113 |
| Error                | 32       | 0.11471        | 0.00358     |         |        |
| Corrected Total      | 33       | 0.14064        |             |         |        |
| Root MSE             | 0.05987  | R-Square       | 0.1844      |         |        |
| Dependent Mean       | 0.21381  | Adj R-Sq       | 0.1589      |         |        |
| Coeff Var            | 28.00217 |                |             |         |        |

| Parameter Estimates |    | Parameter Estimate | Standard Error | t Value | Pr >  t | Squared Semi-partial Corr Type I | 95% Confidence Limits |
|---------------------|----|--------------------|----------------|---------|---------|----------------------------------|-----------------------|
| Variable            | DF |                    |                |         |         |                                  |                       |
| Intercept           | 1  | 0.14388            | 0.02795        | 5.15    | <.0001  | 0.08694                          | 0.20082               |
| mmfat               | 1  | 0.0014             | 0.00052        | 2.69    | 0.0113  | 0.1844                           | 0.00034 0.00246       |

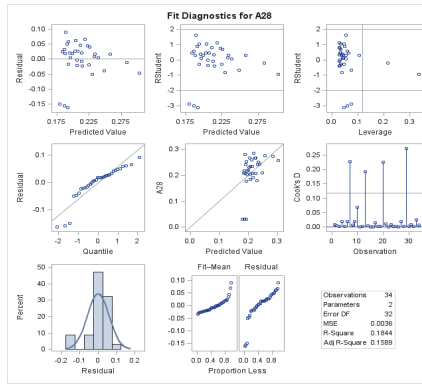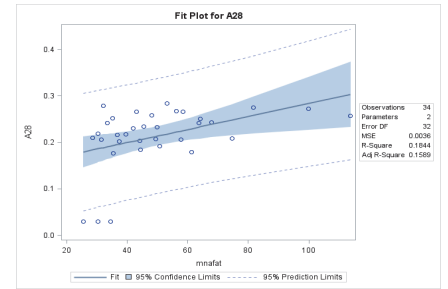

**Adduct (A45-A29-A35-A37)**

The REG Procedure  
 Model: MODEL1  
 Dependent Variable: A45

Number of Observations Read 34  
 Number of Observations Used 34

| Analysis of Variance |           | Sum of Squares | Mean Square | F Value | Pr > F |
|----------------------|-----------|----------------|-------------|---------|--------|
| Source               | DF        |                |             |         |        |
| Model                | 3         | 1957.374       | 639.1248    | 6.22    | 0.0021 |
| Error                | 30        | 3082.586       | 102.7529    |         |        |
| Corrected Total      | 33        | 4999.96        |             |         |        |
| Root MSE             | 10.13671  | R-Square       | 0.3835      |         |        |
| Dependent Mean       | 559.77482 | Adj R-Sq       | 0.3218      |         |        |
| Coeff Var            | 1.81085   |                |             |         |        |

| Parameter Estimates |    | Parameter Estimate | Standard Error | t Value | Pr >  t | Squared Semi-partial Corr Type I | 95% Confidence Limits |
|---------------------|----|--------------------|----------------|---------|---------|----------------------------------|-----------------------|
| Variable            | DF |                    |                |         |         |                                  |                       |
| Intercept           | 1  | 569.0614           | 5.06798        | 112.29  | <.0001  | 558.7112                         | 579.4116              |
| Smoke               | 1  | -11.0416           | 4.08882        | -2.7    | 0.0113  | 0.2731                           | -19.3921 -2.69114     |
| mmfat               | 1  | 0.33821            | 0.16149        | 2.09    | 0.0448  | 0.00502                          | 0.0084 0.66802        |
| mmfat               | 1  | -0.60386           | 0.2667         | -2.26   | 0.031   | 0.10535                          | -1.14853 -0.05918     |

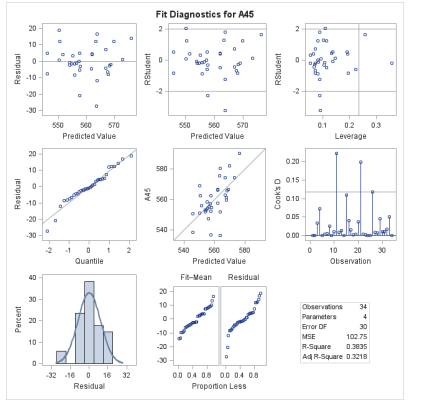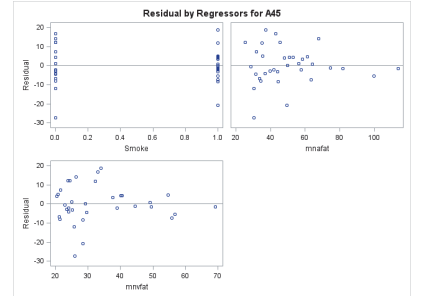

**Adduct A31**

Dependent Variable: A31

Number of Observations Read 34  
 Number of Observations Used 34

| Analysis of Variance |          | Sum of Squares | Mean Square | F Value | Pr > F |
|----------------------|----------|----------------|-------------|---------|--------|
| Source               | DF       |                |             |         |        |
| Model                | 2        | 0.03835        | 0.01917     | 3.61    | 0.0388 |
| Error                | 31       | 0.12157        | 0.00392     |         |        |
| Corrected Total      | 33       | 0.14991        |             |         |        |
| Root MSE             | 0.06262  | R-Square       | 0.1891      |         |        |
| Dependent Mean       | 0.28888  | Adj R-Sq       | 0.1368      |         |        |
| Coeff Var            | 21.67765 |                |             |         |        |

| Parameter Estimates |    | Parameter Estimate | Standard Error | t Value | Pr >  t | Squared Semi-partial Corr Type I | 95% Confidence Limits |
|---------------------|----|--------------------|----------------|---------|---------|----------------------------------|-----------------------|
| Variable            | DF |                    |                |         |         |                                  |                       |
| Intercept           | 1  | 0.2441             | 0.01983        | 12.31   | <.0001  | 0.20366                          | 0.28454               |
| Smoke               | 1  | 0.04591            | 0.02167        | 2.12    | 0.0442  | 0.10644                          | 0.00172 0.0901        |
| Race                | 1  | 0.03825            | 0.02152        | 1.78    | 0.0853  | 0.08265                          | -0.00564 0.08213      |

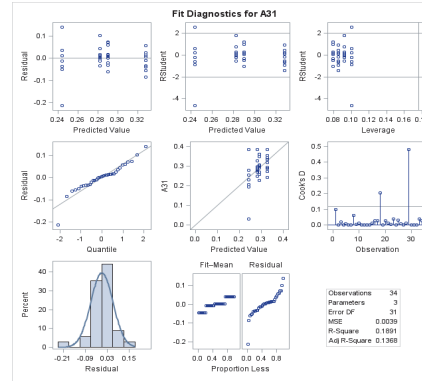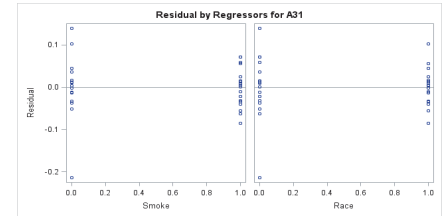

**Adduct 34**

The REG Procedure  
 Model: MODEL1  
 Dependent Variable: A34

Number of Observations Read 34  
 Number of Observations Used 34

| Analysis of Variance |          | Sum of Squares | Mean Square | F Value | Pr > F |
|----------------------|----------|----------------|-------------|---------|--------|
| Source               | DF       |                |             |         |        |
| Model                | 2        | 0.43927        | 0.21964     | 8.88    | 0.0009 |
| Error                | 31       | 0.76585        | 0.02474     |         |        |
| Corrected Total      | 33       | 1.20612        |             |         |        |
| Root MSE             | 0.15728  | R-Square       | 0.3642      |         |        |
| Dependent Mean       | 0.59907  | Adj R-Sq       | 0.3232      |         |        |
| Coeff Var            | 26.25401 |                |             |         |        |

| Parameter Estimates |    | Parameter Estimate | Standard Error | t Value | Pr >  t | Squared Semi-partial Corr Type I | 95% Confidence Limits |
|---------------------|----|--------------------|----------------|---------|---------|----------------------------------|-----------------------|
| Variable            | DF |                    |                |         |         |                                  |                       |
| Intercept           | 1  | 0.77518            | 0.04888        | 15.57   | <.0001  | 0.67178                          | 0.87691               |
| Smoke               | 1  | -0.16962           | 0.05442        | -3.12   | 0.0039  | 0.1777                           | -0.28061 0.05863      |
| Race                | 1  | -0.16297           | 0.05404        | -3.02   | 0.0051  | 0.18651                          | -0.27319 -0.05275     |

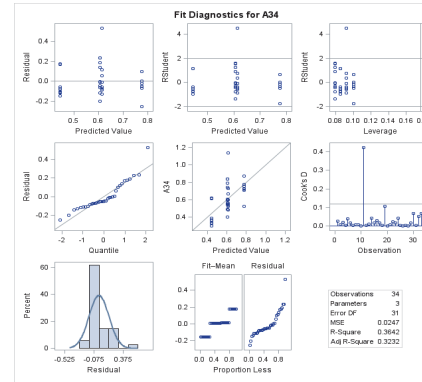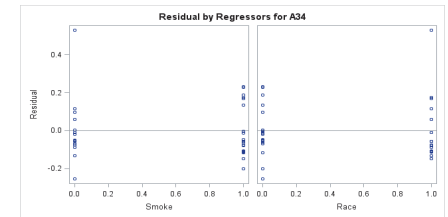

**Adduct 38**  
The REG Procedure  
Model: MODEL1  
Dependent Variable: A38

|                             |    |
|-----------------------------|----|
| Number of Observations Read | 34 |
| Number of Observations Used | 34 |

Analysis of Variance

| Source          | DF | Sum of Squares | Mean Square | F Value | Pr > F |
|-----------------|----|----------------|-------------|---------|--------|
| Model           | 2  | 0.07986        | 0.03993     | 5.65    | 0.0081 |
| Error           | 31 | 0.21907        | 0.00707     |         |        |
| Corrected Total | 33 | 0.29892        |             |         |        |

Root MSE 0.08406  
Dependent Mean 0.5423  
Coeff Var 15.50149

Parameter Estimates

| Variable  | DF | Parameter Estimate | Standard Error | t Value | Pr >  t | Squared Semi-partial Corr Type I | 95% Confidence Limits |
|-----------|----|--------------------|----------------|---------|---------|----------------------------------|-----------------------|
| Intercept | 1  | 0.83171            | 0.12795        | 6.5     | <.0001  |                                  | 0.57075 1.09267       |
| Race      | 1  | 0.11643            | 0.03559        | 3.27    | 0.0026  | 0.11436                          | 0.04386 0.18901       |
| mmfmi     | 1  | -0.01332           | 0.00524        | -2.54   | 0.0162  | 0.15278                          | -0.024 -0.00263       |

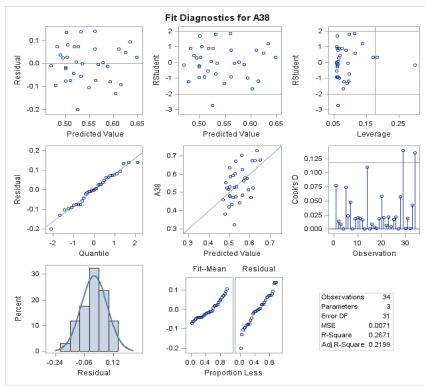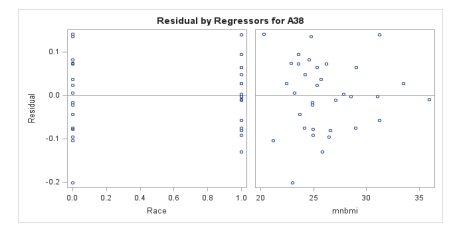

**Adduct 39**  
The REG Procedure  
Model: MODEL1  
Dependent Variable: A39

|                             |    |
|-----------------------------|----|
| Number of Observations Read | 33 |
| Number of Observations Used | 33 |

Analysis of Variance

| Source          | DF | Sum of Squares | Mean Square | F Value | Pr > F |
|-----------------|----|----------------|-------------|---------|--------|
| Model           | 2  | 0.02282        | 0.01141     | 6.8     | 0.0037 |
| Error           | 30 | 0.05034        | 0.00168     |         |        |
| Corrected Total | 32 | 0.07316        |             |         |        |

Root MSE 0.04096  
R-Square 0.3119  
Dependent Mean 0.12784  
Adj R-Sq 0.266  
Coeff Var 32.04275

Parameter Estimates

| Variable  | DF | Parameter Estimate | Standard Error | t Value | Pr >  t | Squared Semi-partial Corr Type I | 95% Confidence Limits   |
|-----------|----|--------------------|----------------|---------|---------|----------------------------------|-------------------------|
| Intercept | 1  | 0.08858            | 0.01305        | 6.79    | <.0001  |                                  | 0.06194 0.11523 0.98831 |
| Smoke     | 1  | 0.04754            | 0.01438        | 3.31    | 0.0025  | 0.22746                          | 0.01818 0.0769 0.00323  |
| Race      | 1  | 0.02748            | 0.01432        | 1.92    | 0.0646  | 0.08444                          | -0.00177 0.05674        |

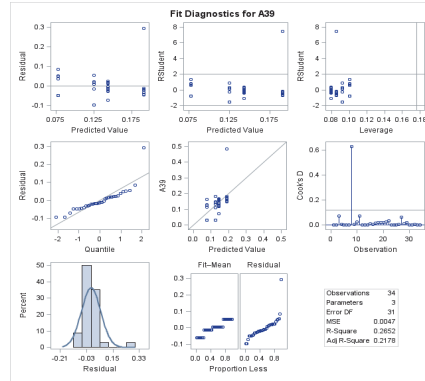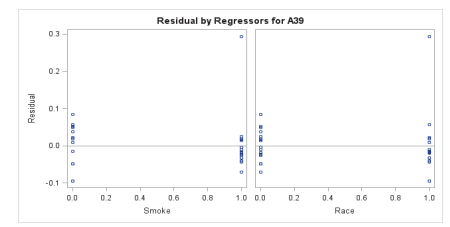

**Adduct 40**  
The REG Procedure  
Model: MODEL1  
Dependent Variable: A40

|                             |    |
|-----------------------------|----|
| Number of Observations Read | 34 |
| Number of Observations Used | 34 |

Analysis of Variance

| Source          | DF | Sum of Squares | Mean Square | F Value | Pr > F |
|-----------------|----|----------------|-------------|---------|--------|
| Model           | 2  | 100.1216       | 50.0608     | 7.18    | 0.0027 |
| Error           | 31 | 216.1606       | 6.97292     |         |        |
| Corrected Total | 33 | 316.2822       |             |         |        |

Root MSE 2.64063  
Dependent Mean 49.14659  
Coeff Var 5.37297

Parameter Estimates

| Variable  | DF | Parameter Estimate | Standard Error | t Value | Pr >  t | Squared Semi-partial Corr Type I | 95% Confidence Limits |
|-----------|----|--------------------|----------------|---------|---------|----------------------------------|-----------------------|
| Intercept | 1  | 51.4759            | 1.31261        | 39.22   | <.0001  |                                  | 48.79881 54.15299     |
| mmfat     | 1  | 0.11918            | 0.04203        | 2.84    | 0.008   | 0.00689                          | 0.03346 0.2049        |
| mmfat     | 1  | -0.24592           | 0.06668        | -3.75   | 0.0007  | 0.30967                          | -0.38592 -0.11392     |

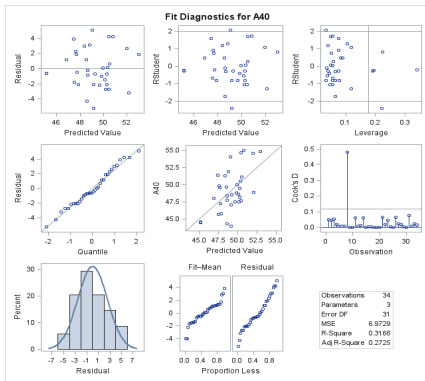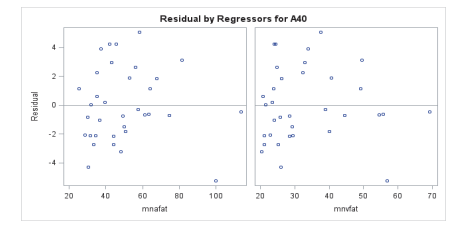

**Adduct 43**  
The REG Procedure  
Model: MODEL1  
Dependent Variable: A43

|                             |    |
|-----------------------------|----|
| Number of Observations Read | 34 |
| Number of Observations Used | 34 |

Analysis of Variance

| Source          | DF | Sum of Squares | Mean Square | F Value | Pr > F |
|-----------------|----|----------------|-------------|---------|--------|
| Model           | 1  | 0.75137        | 0.75137     | 9.11    | 0.005  |
| Error           | 32 | 2.63901        | 0.08247     |         |        |
| Corrected Total | 33 | 3.39038        |             |         |        |

Root MSE 0.28717  
Dependent Mean 2.16099  
Coeff Var 13.28904

Parameter Estimates

| Variable  | DF | Parameter Estimate | Standard Error | t Value | Pr >  t | Squared Semi-partial Corr Type I | 95% Confidence Limits |
|-----------|----|--------------------|----------------|---------|---------|----------------------------------|-----------------------|
| Intercept | 1  | 3.30349            | 0.3817         | 8.65    | <.0001  |                                  | 2.52599 4.08099       |
| mmfmi     | 1  | -0.04377           | 0.0145         | -3.02   | 0.005   | 0.22162                          | -0.07331 -0.01423     |

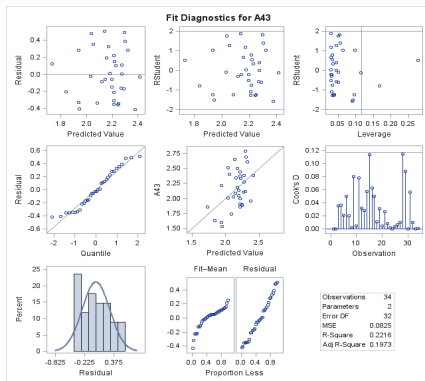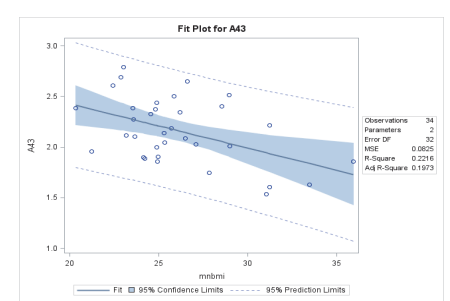



**Figure S1** – The MS2 spectra of T3 and its related adducts coded from A1 to A43. The headline in each figure indicates the raw file name\_sample ID\_Precursor scan #\_MIM\_RT\_Tandem scan #.

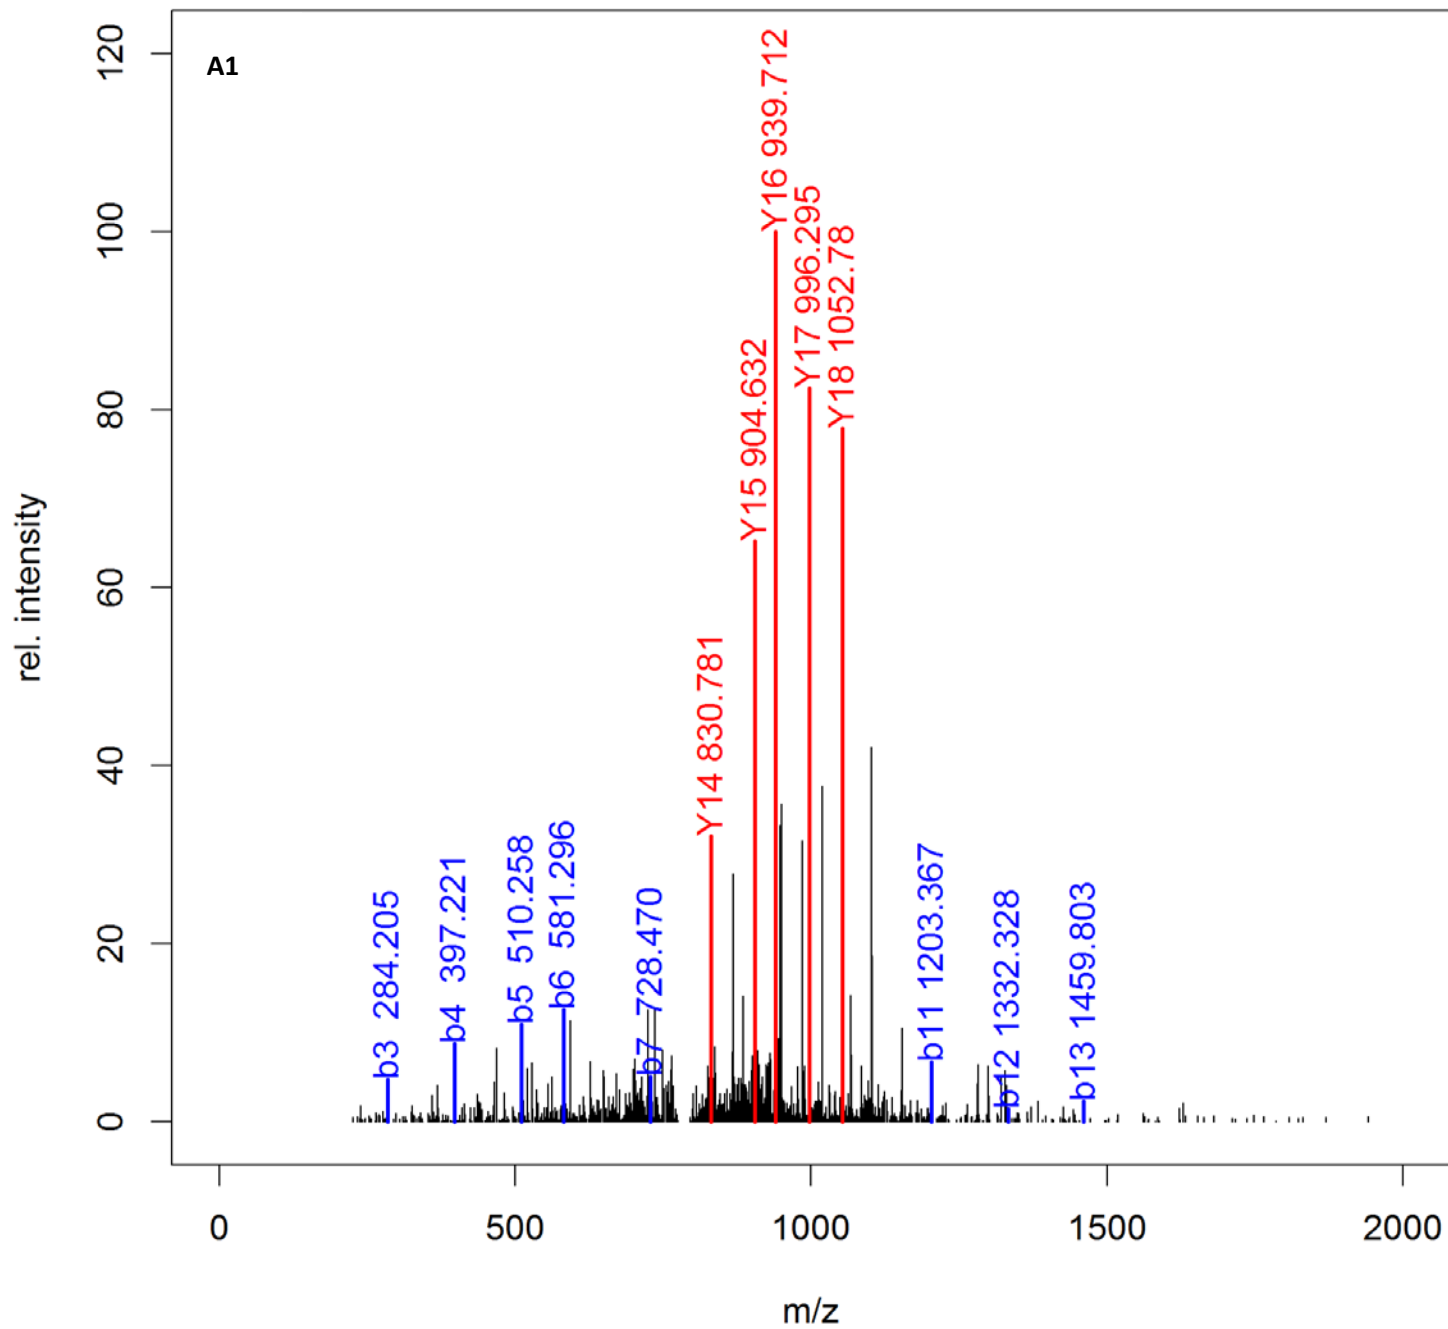

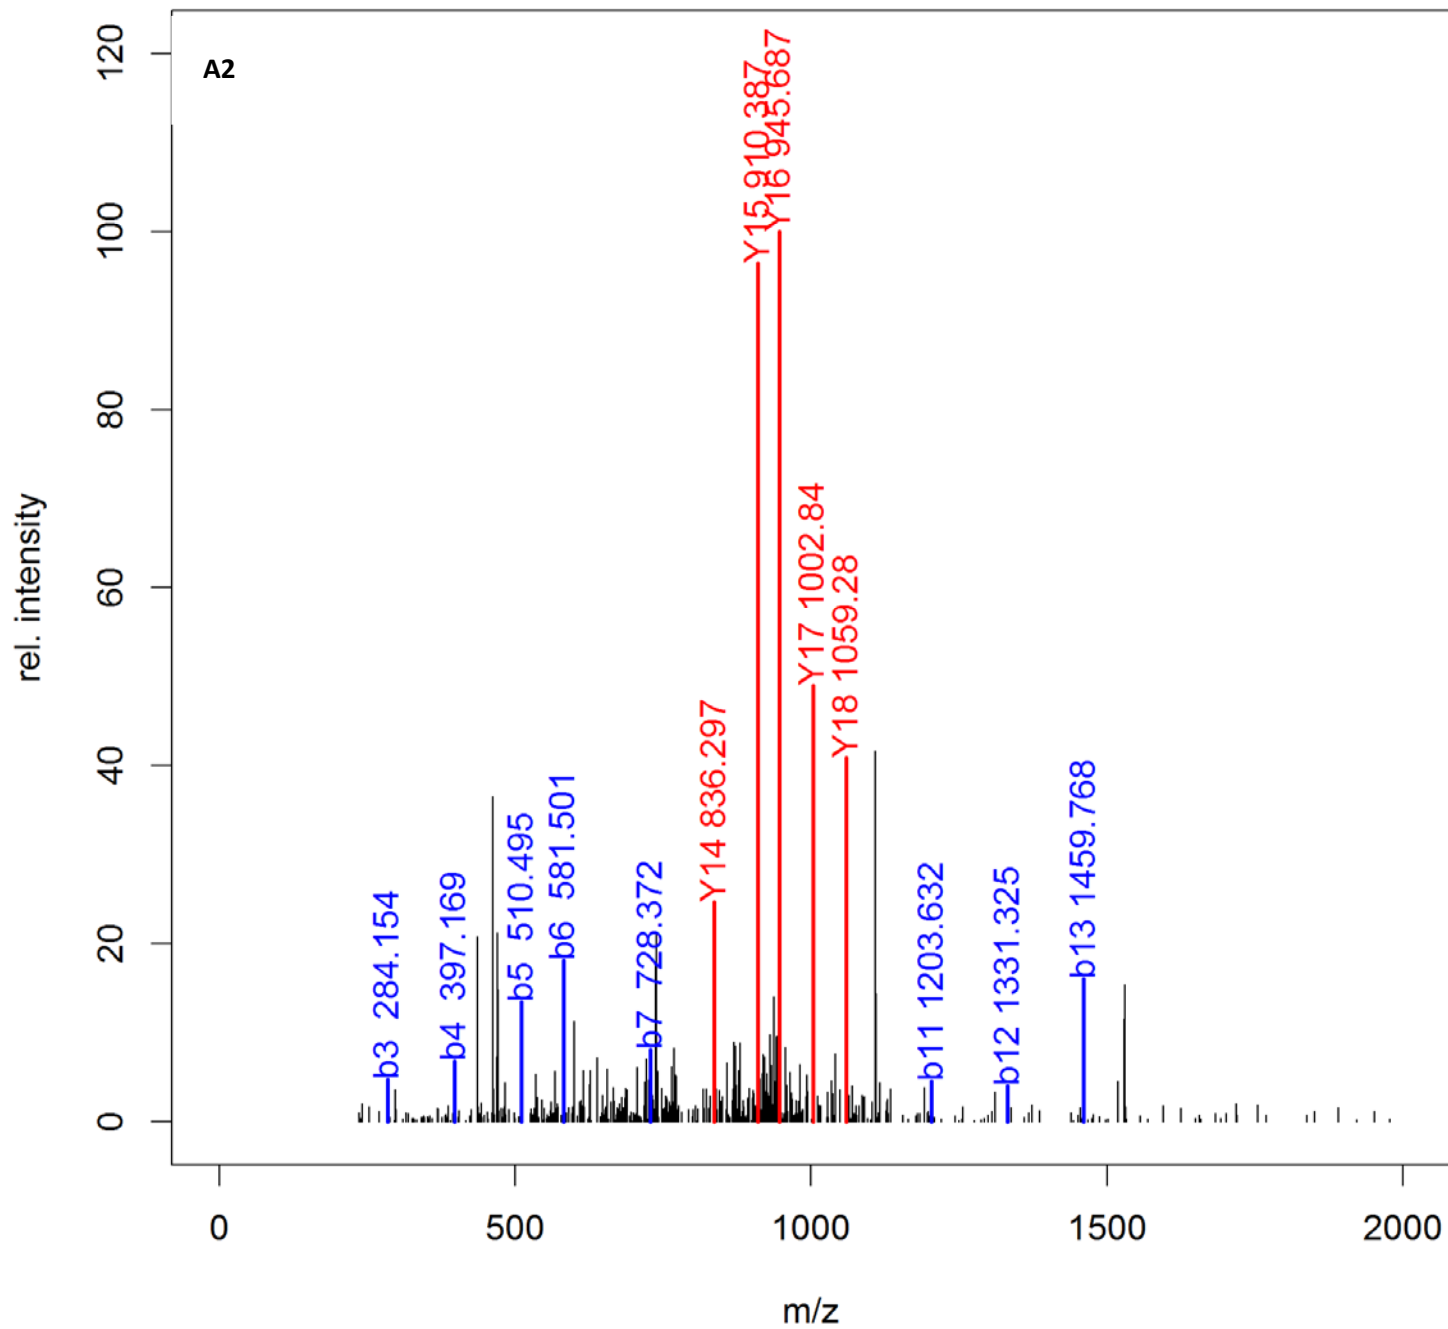

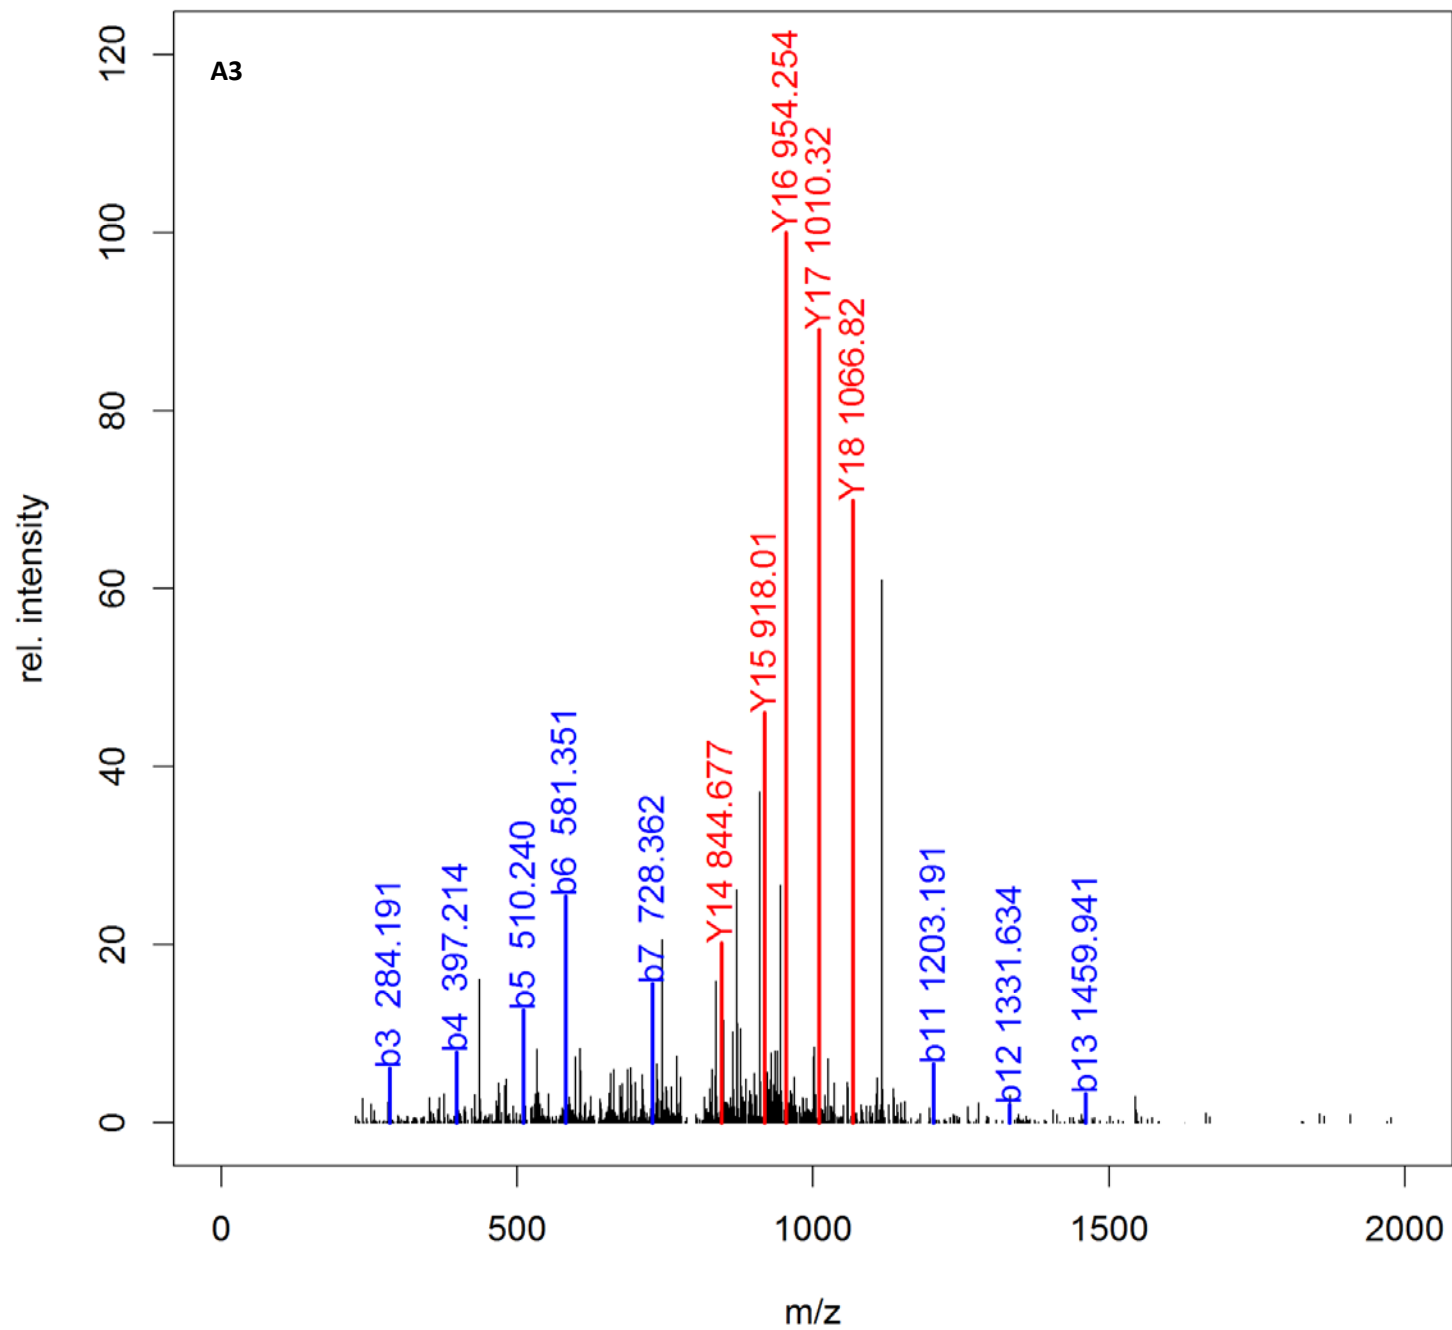

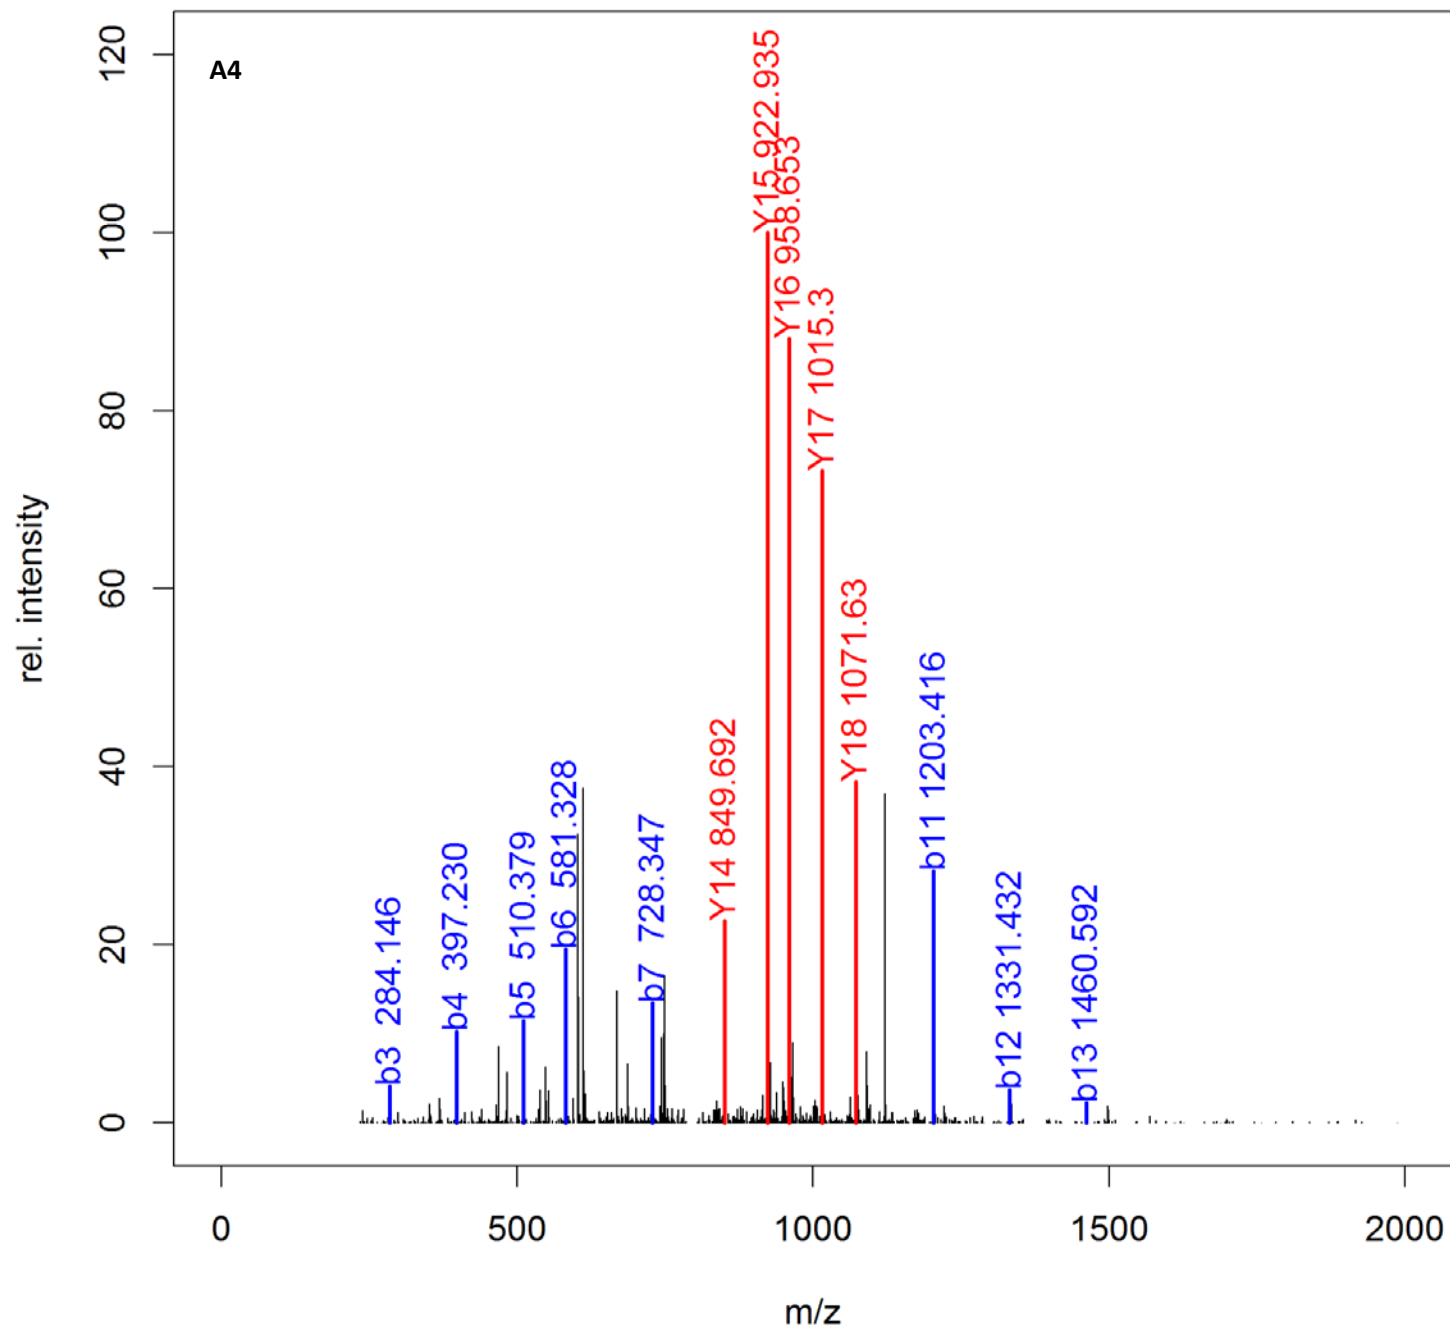

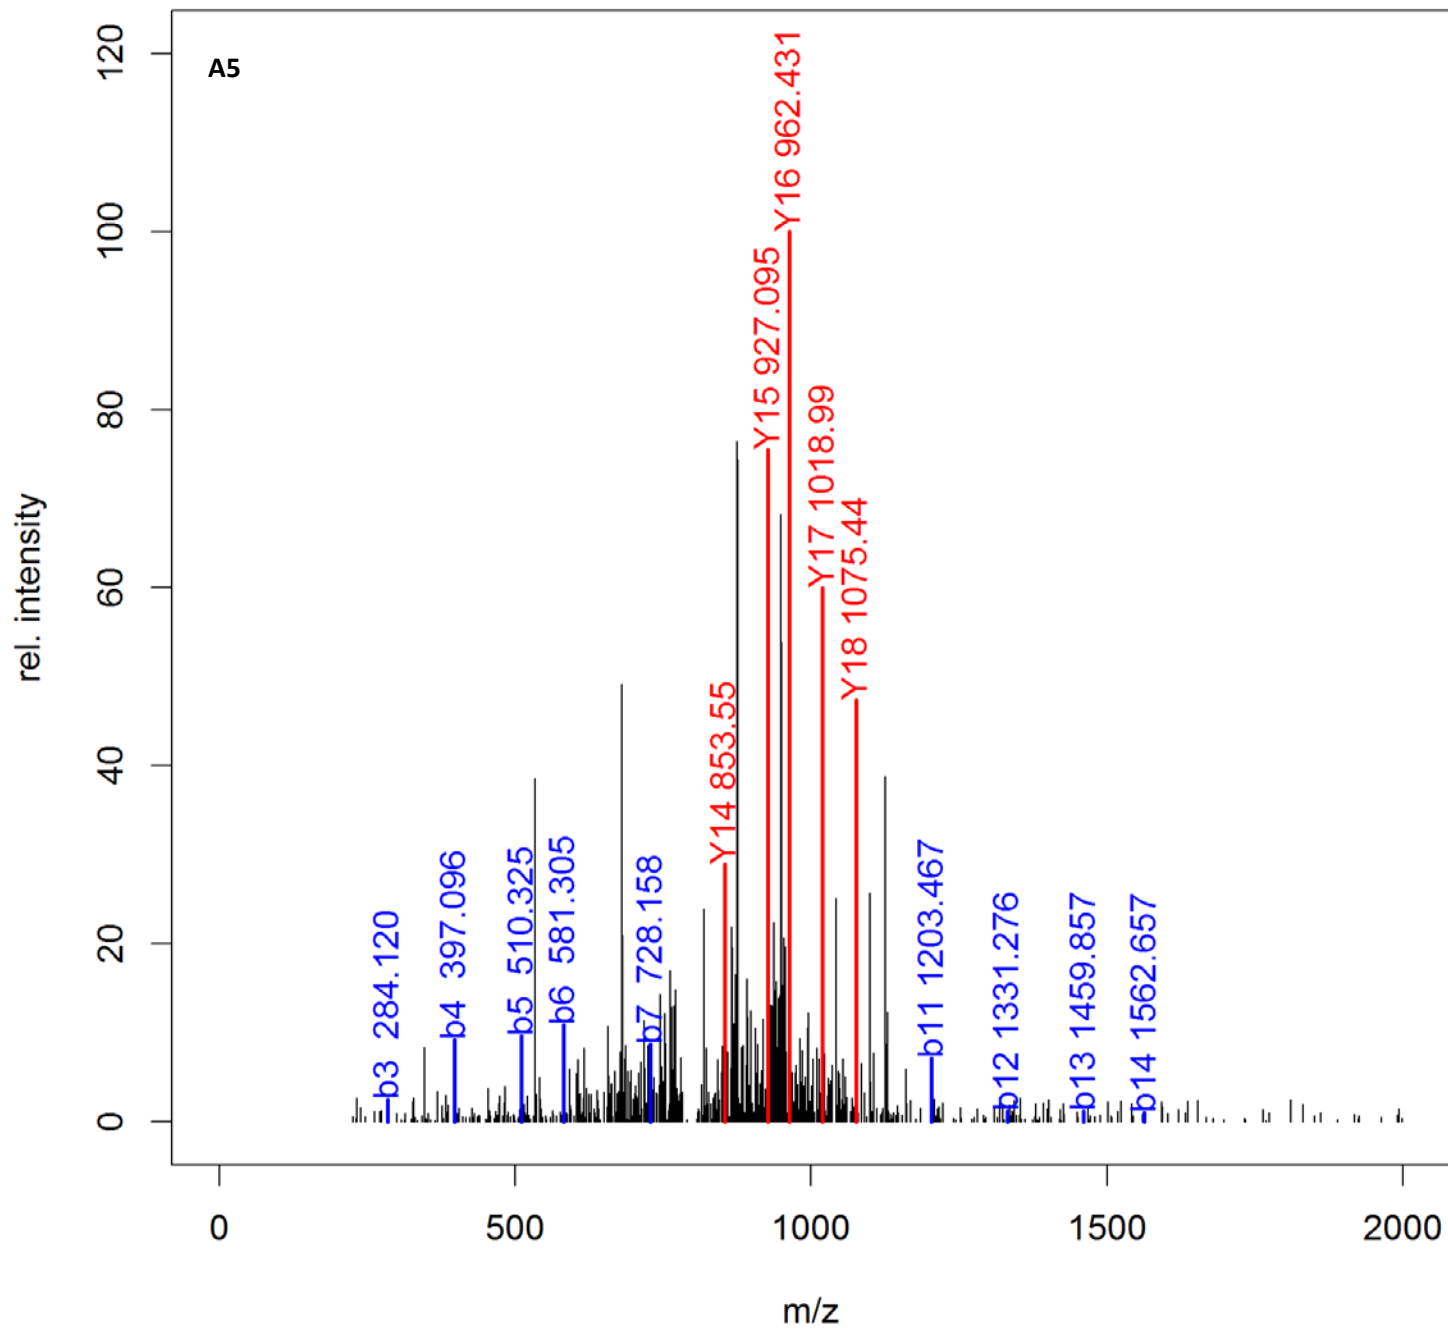

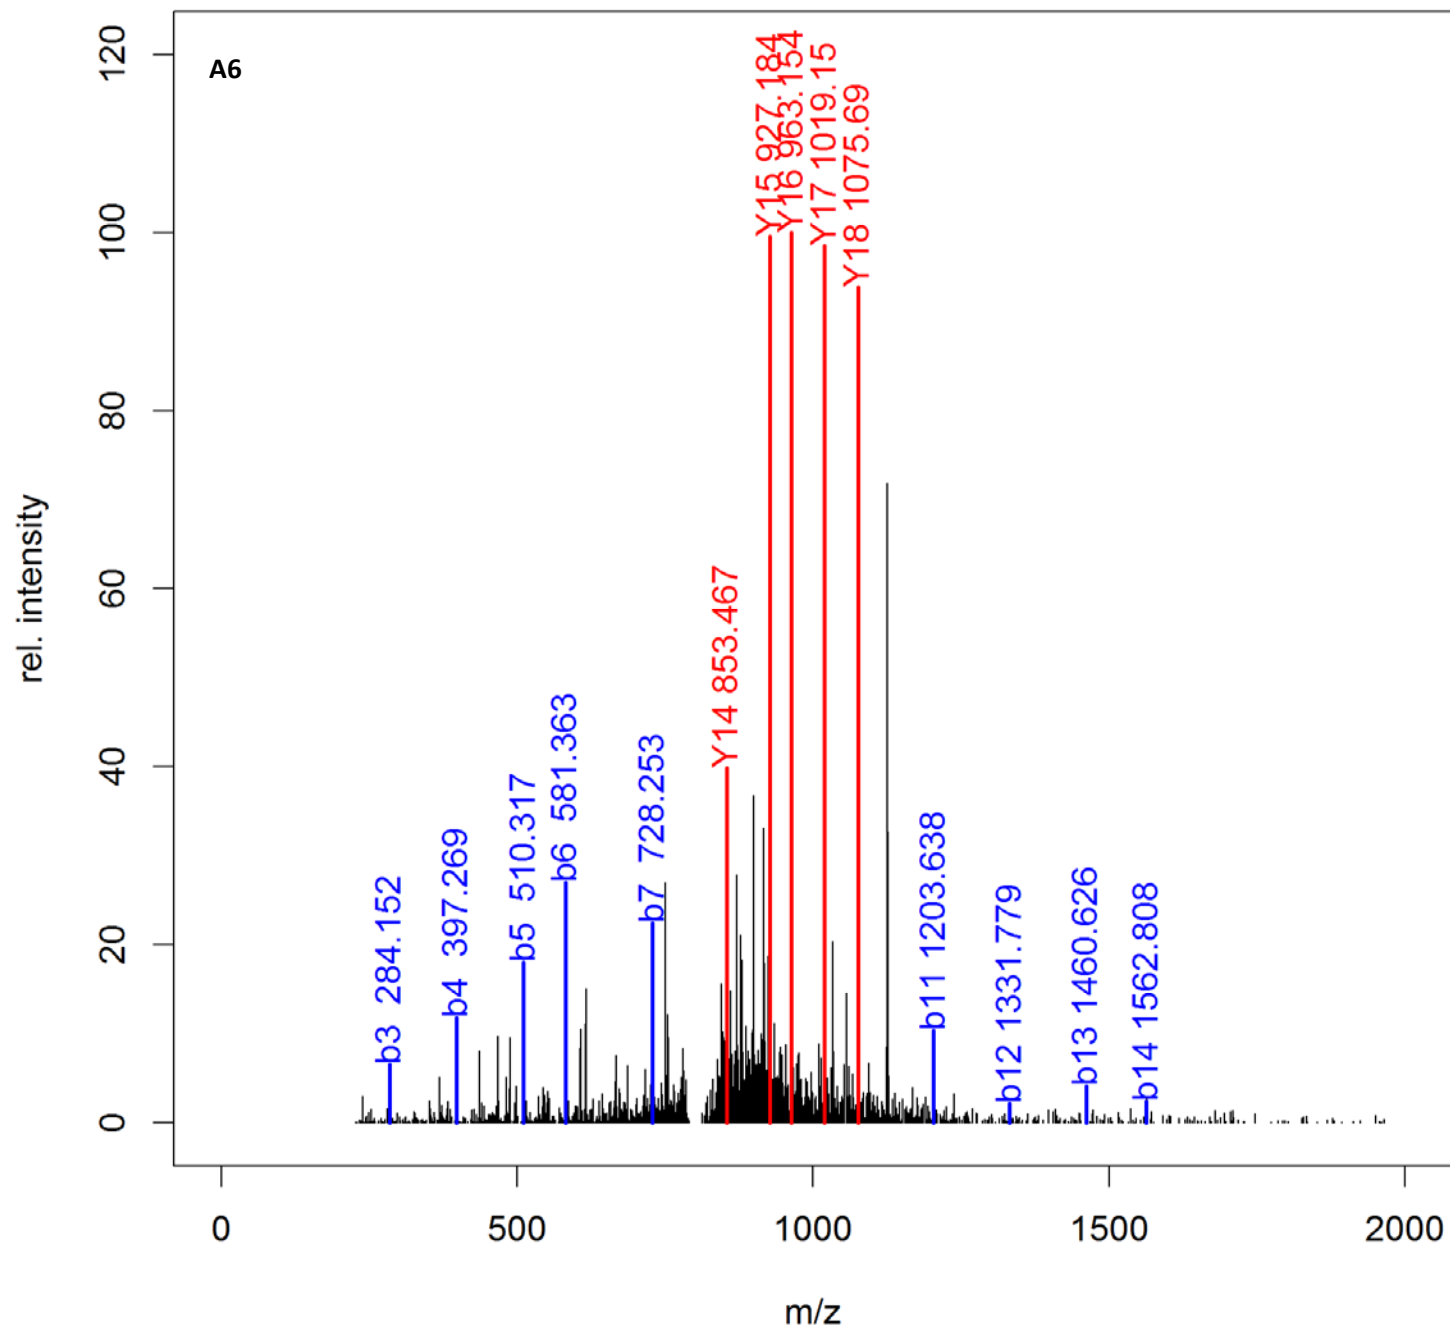

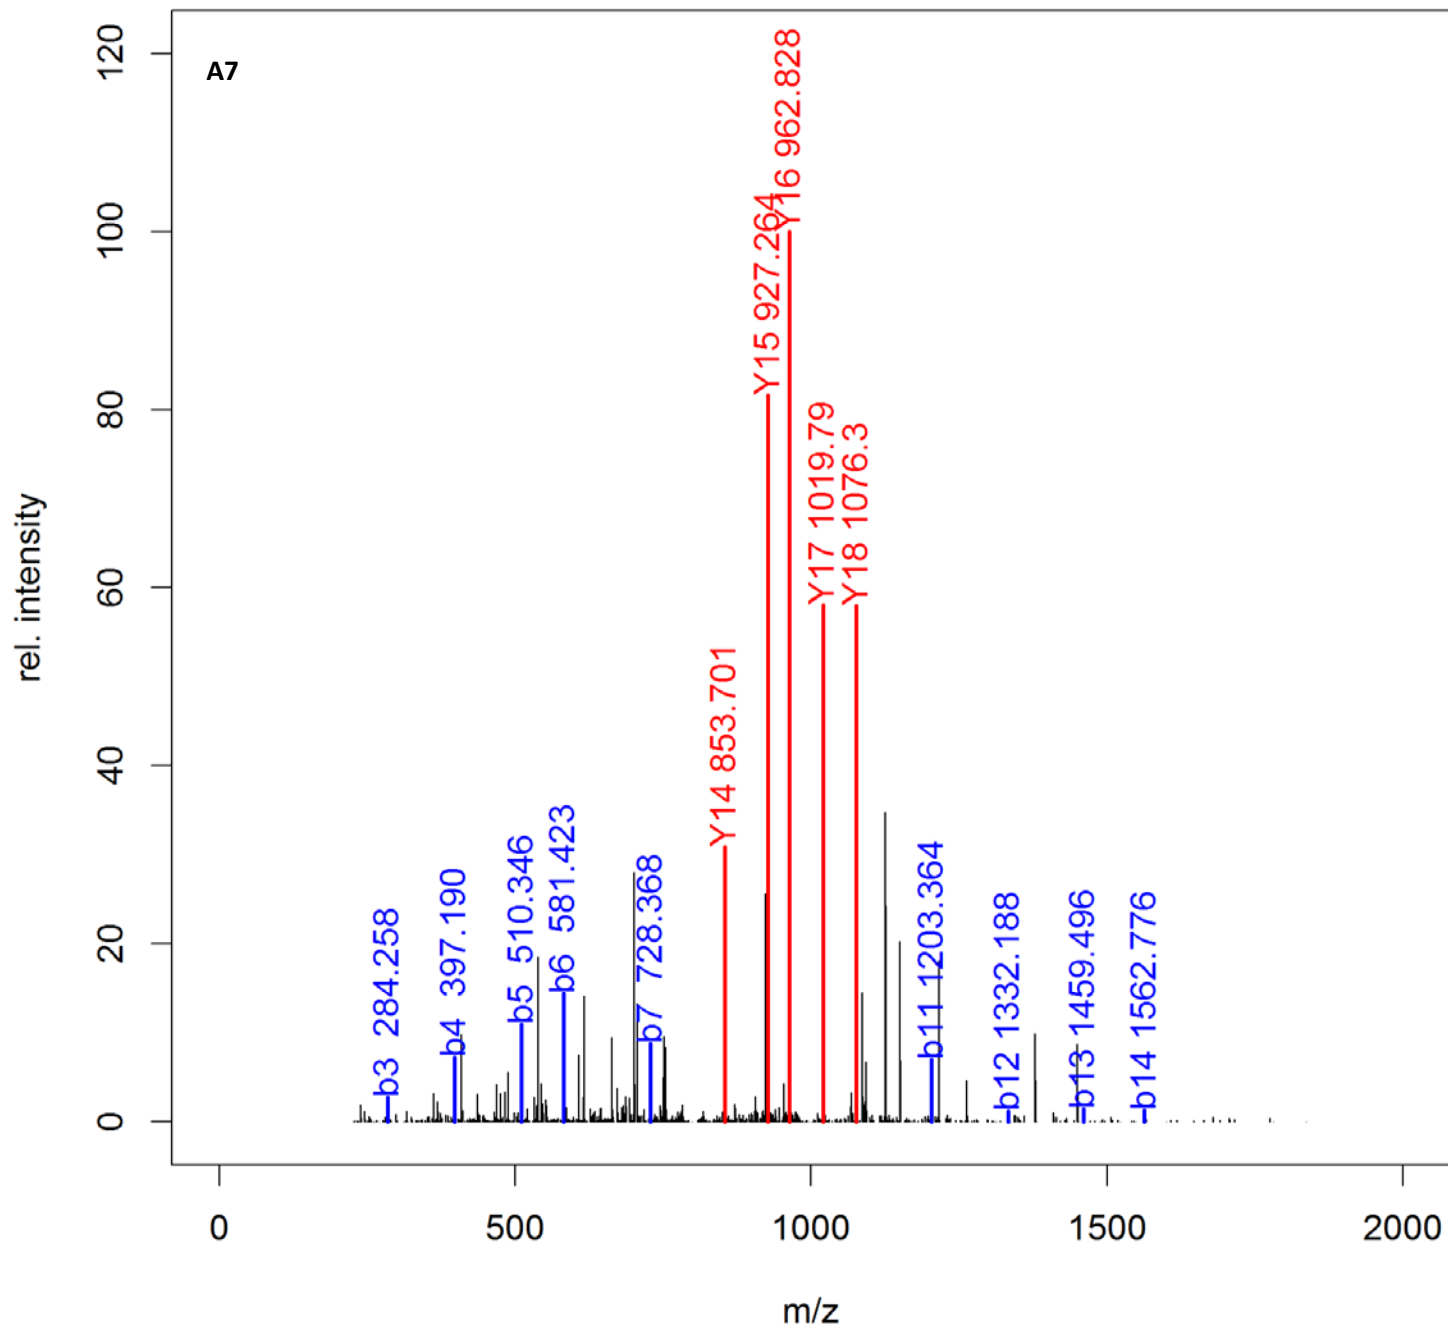



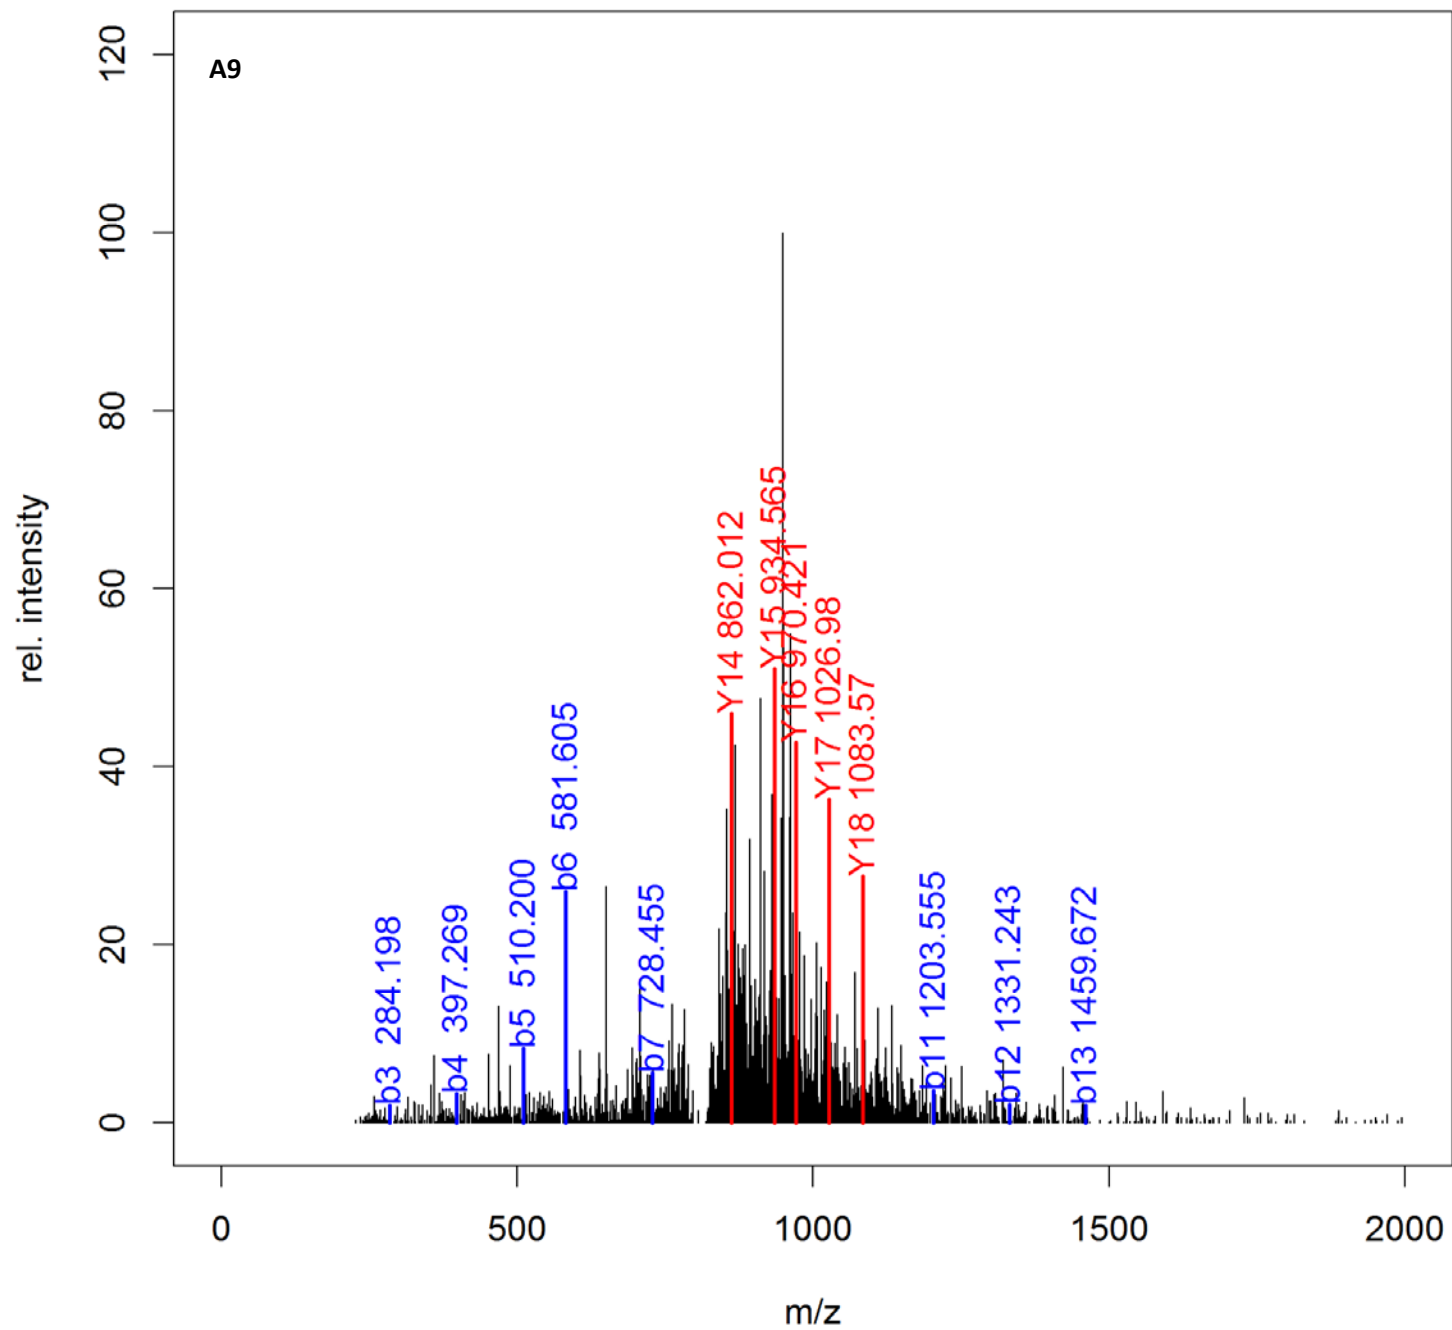

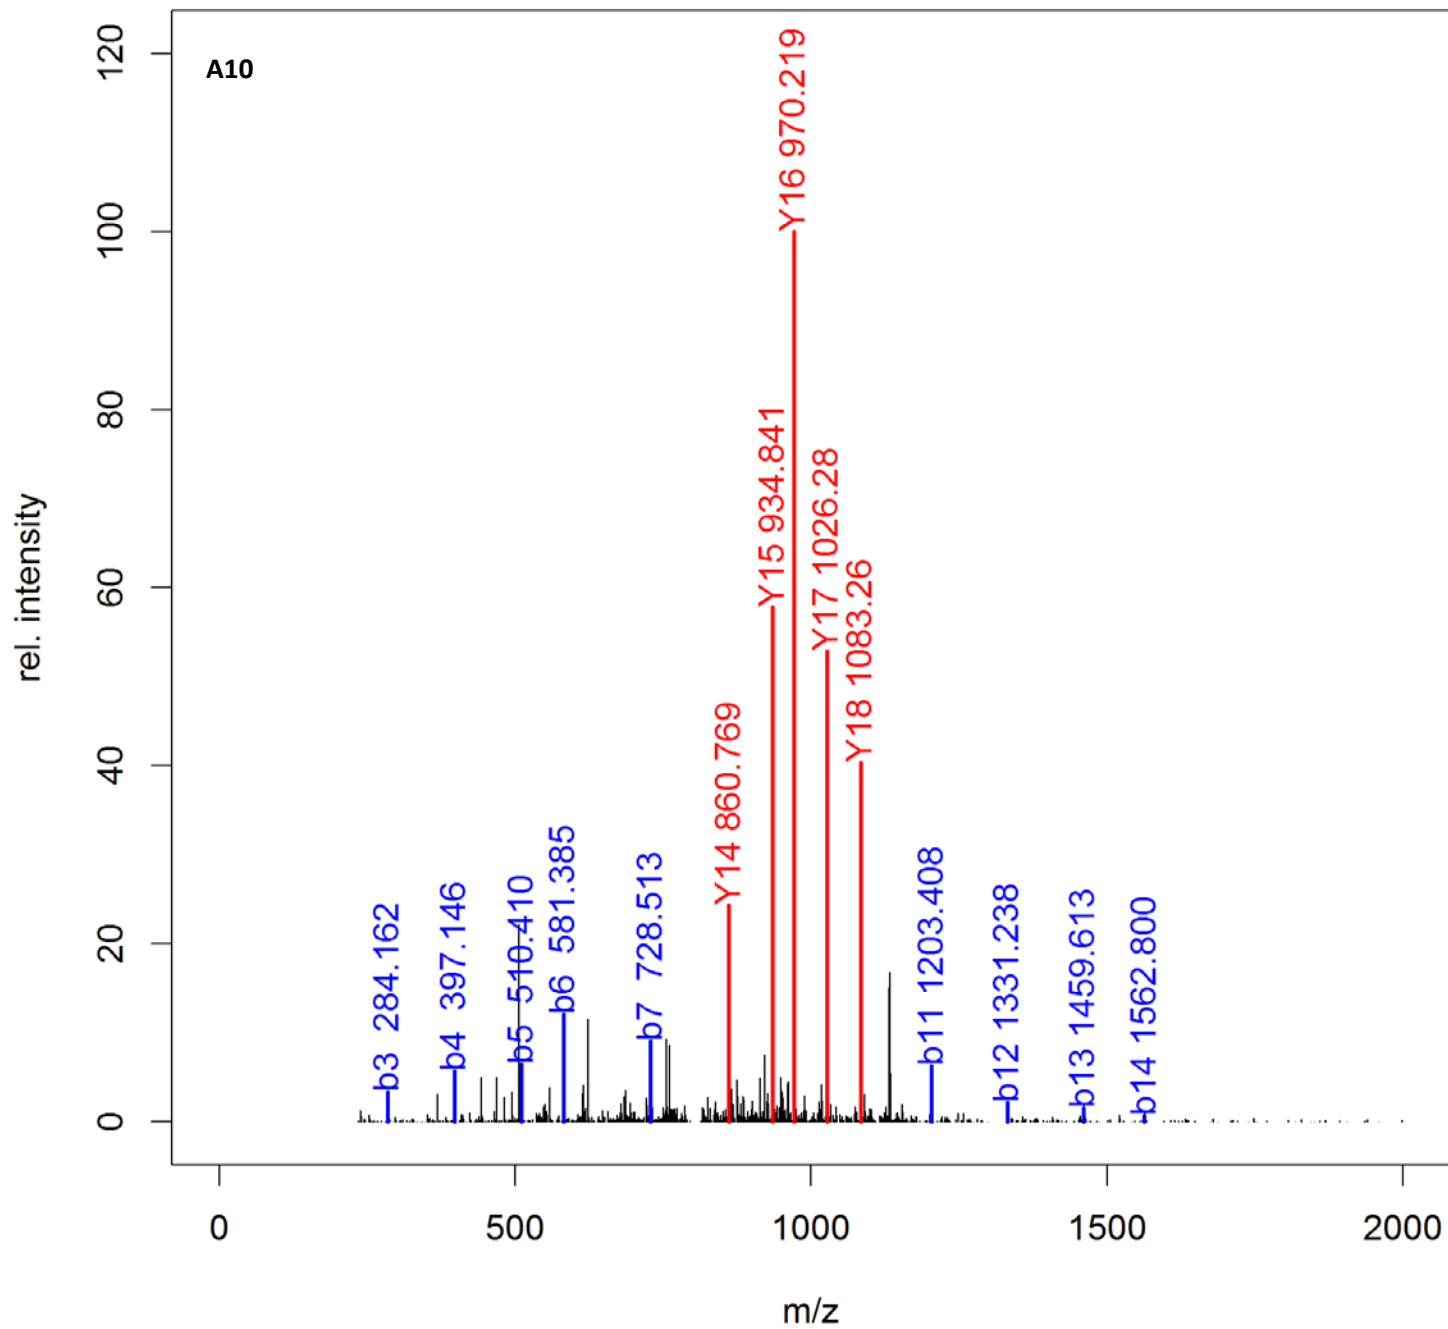

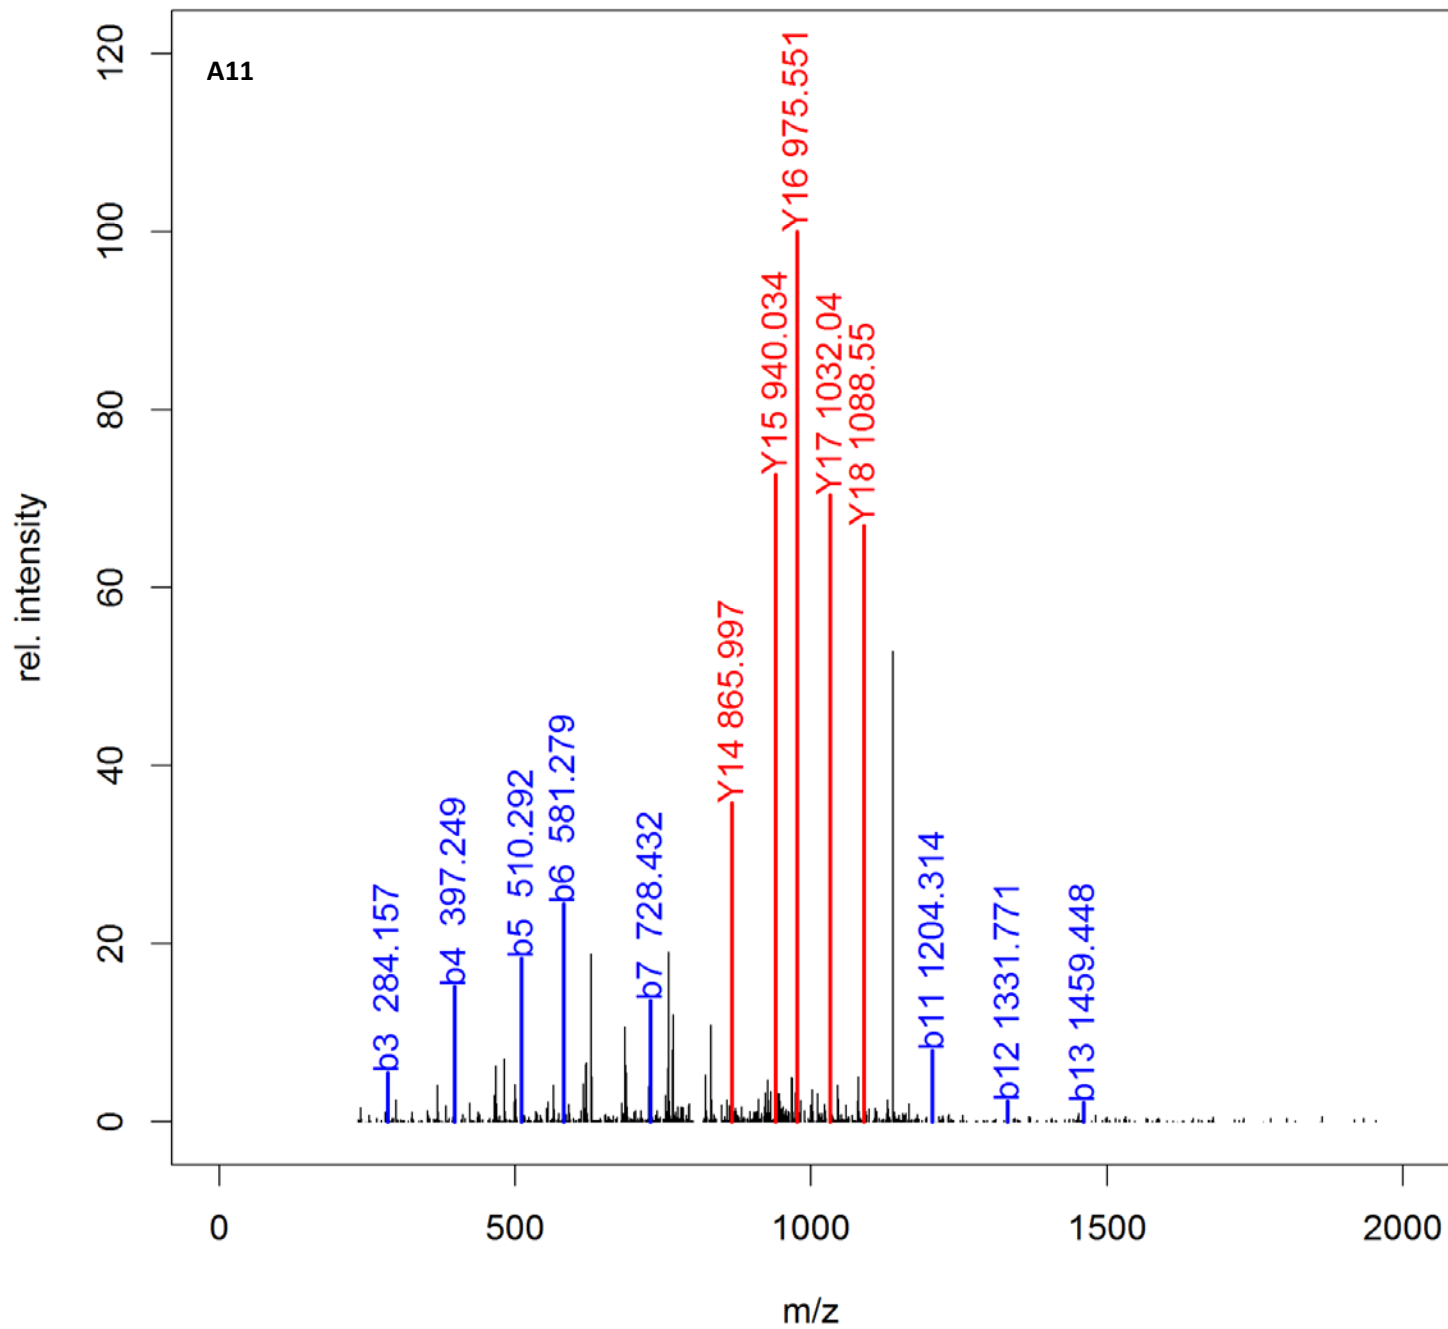

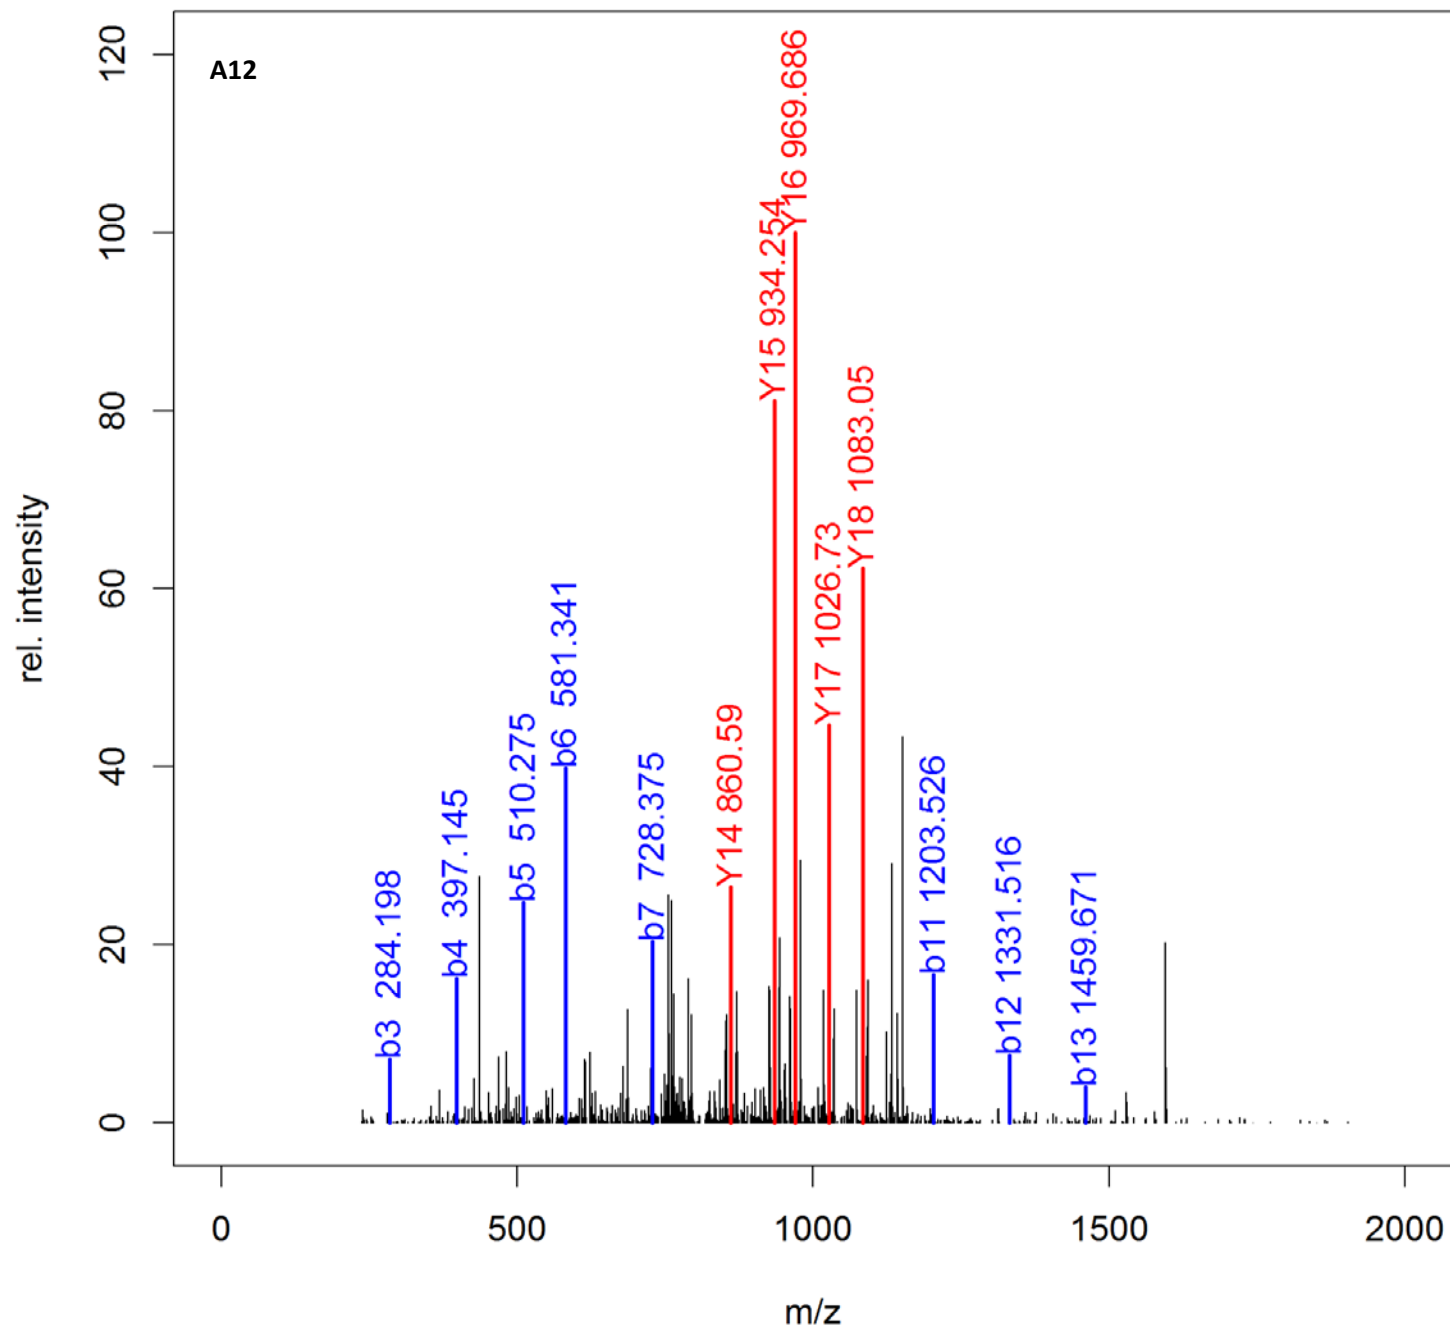

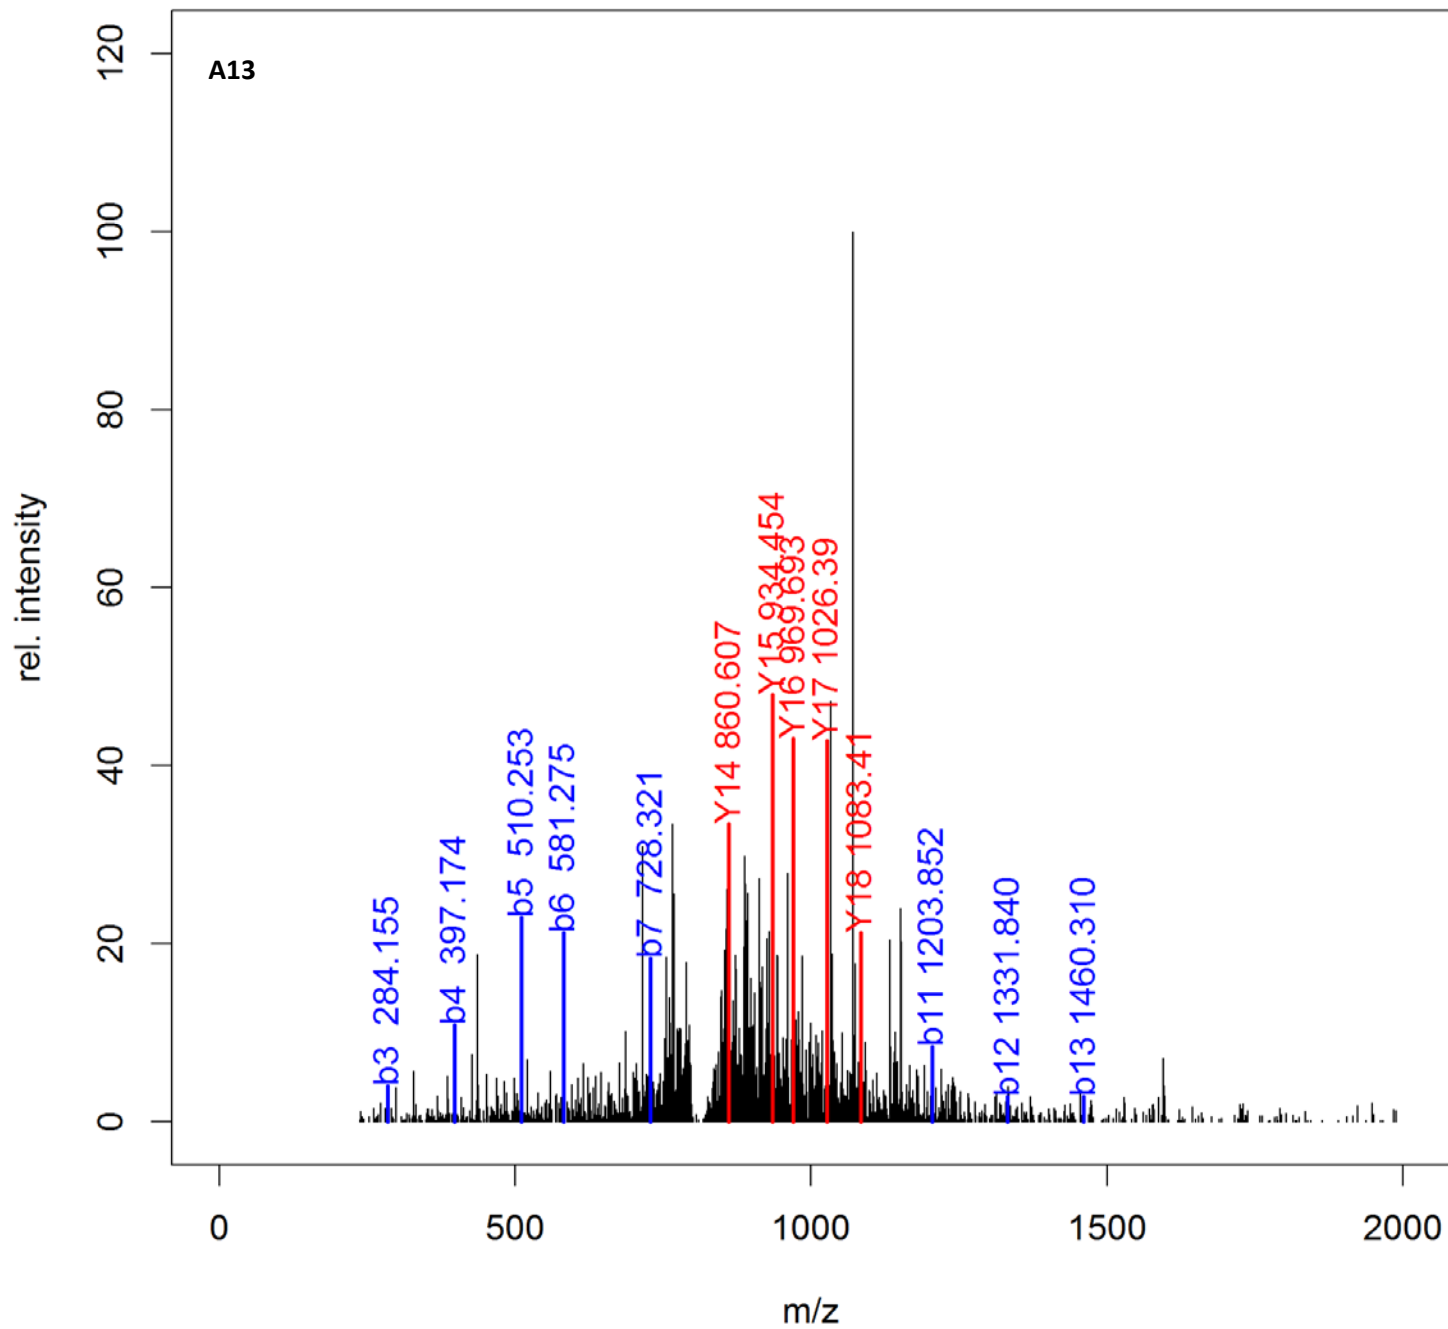

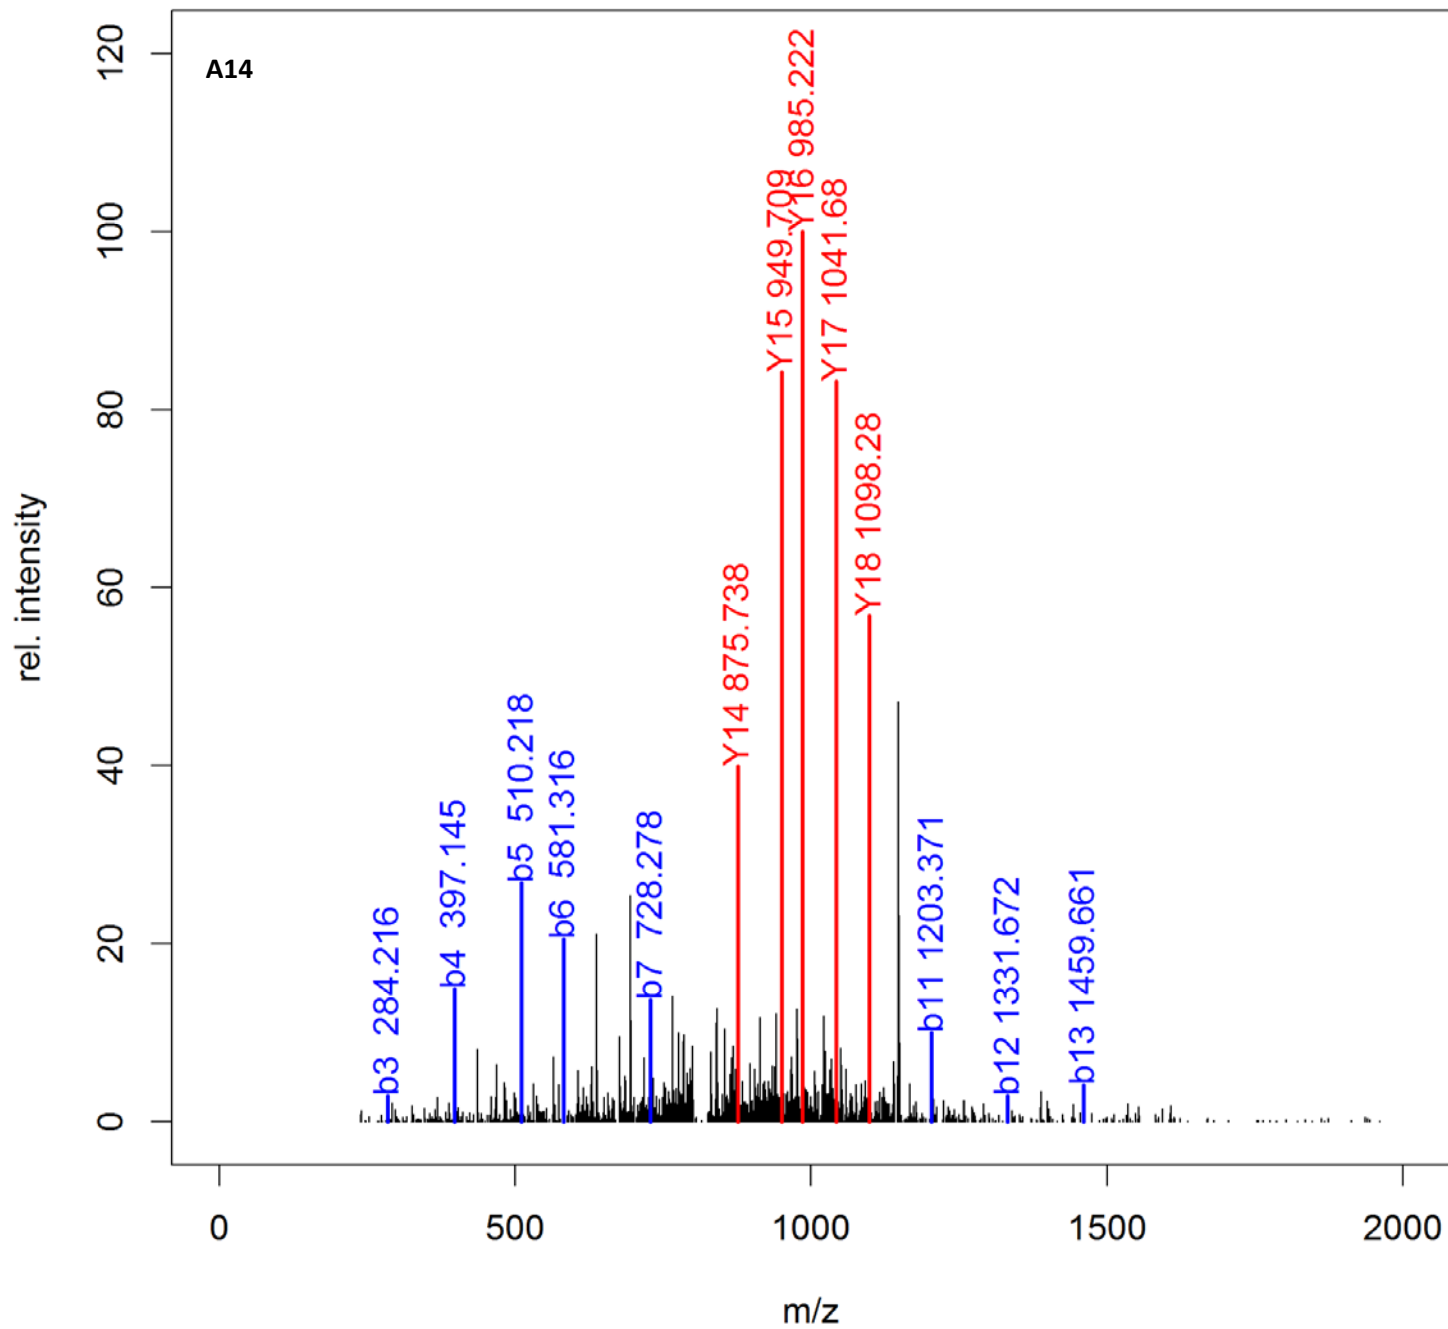

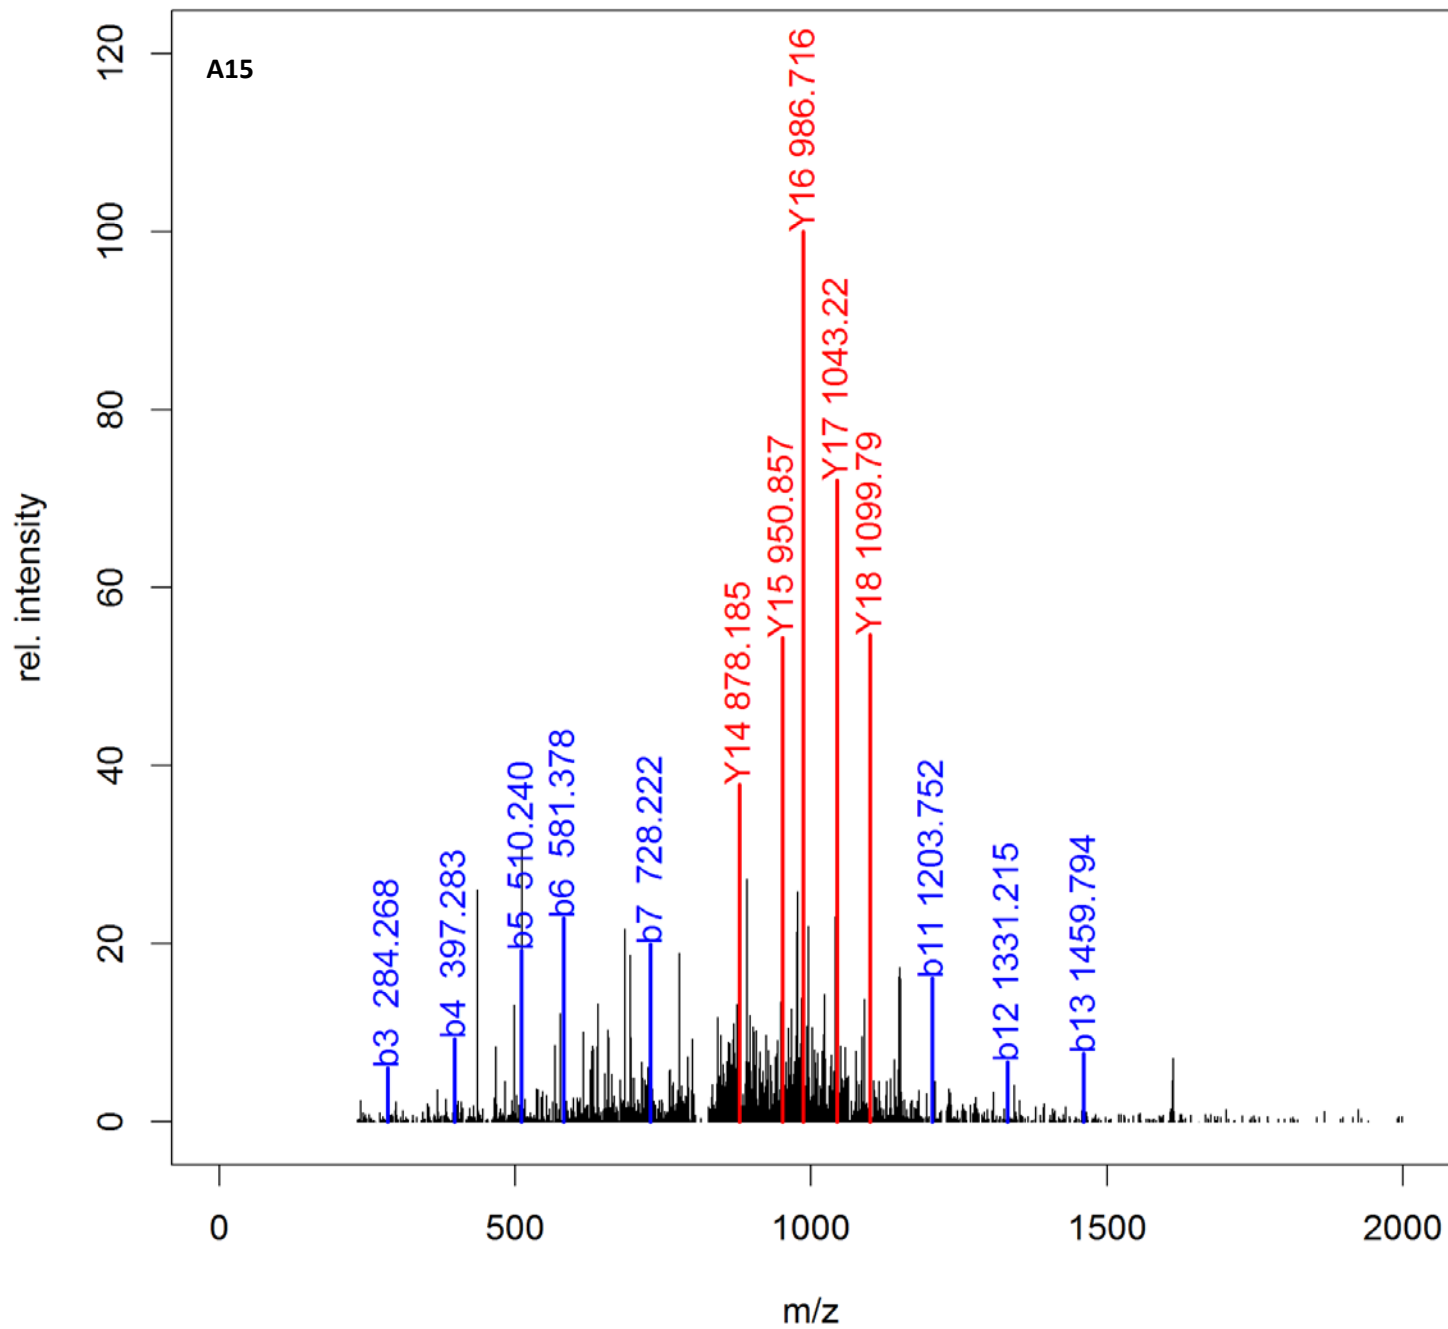

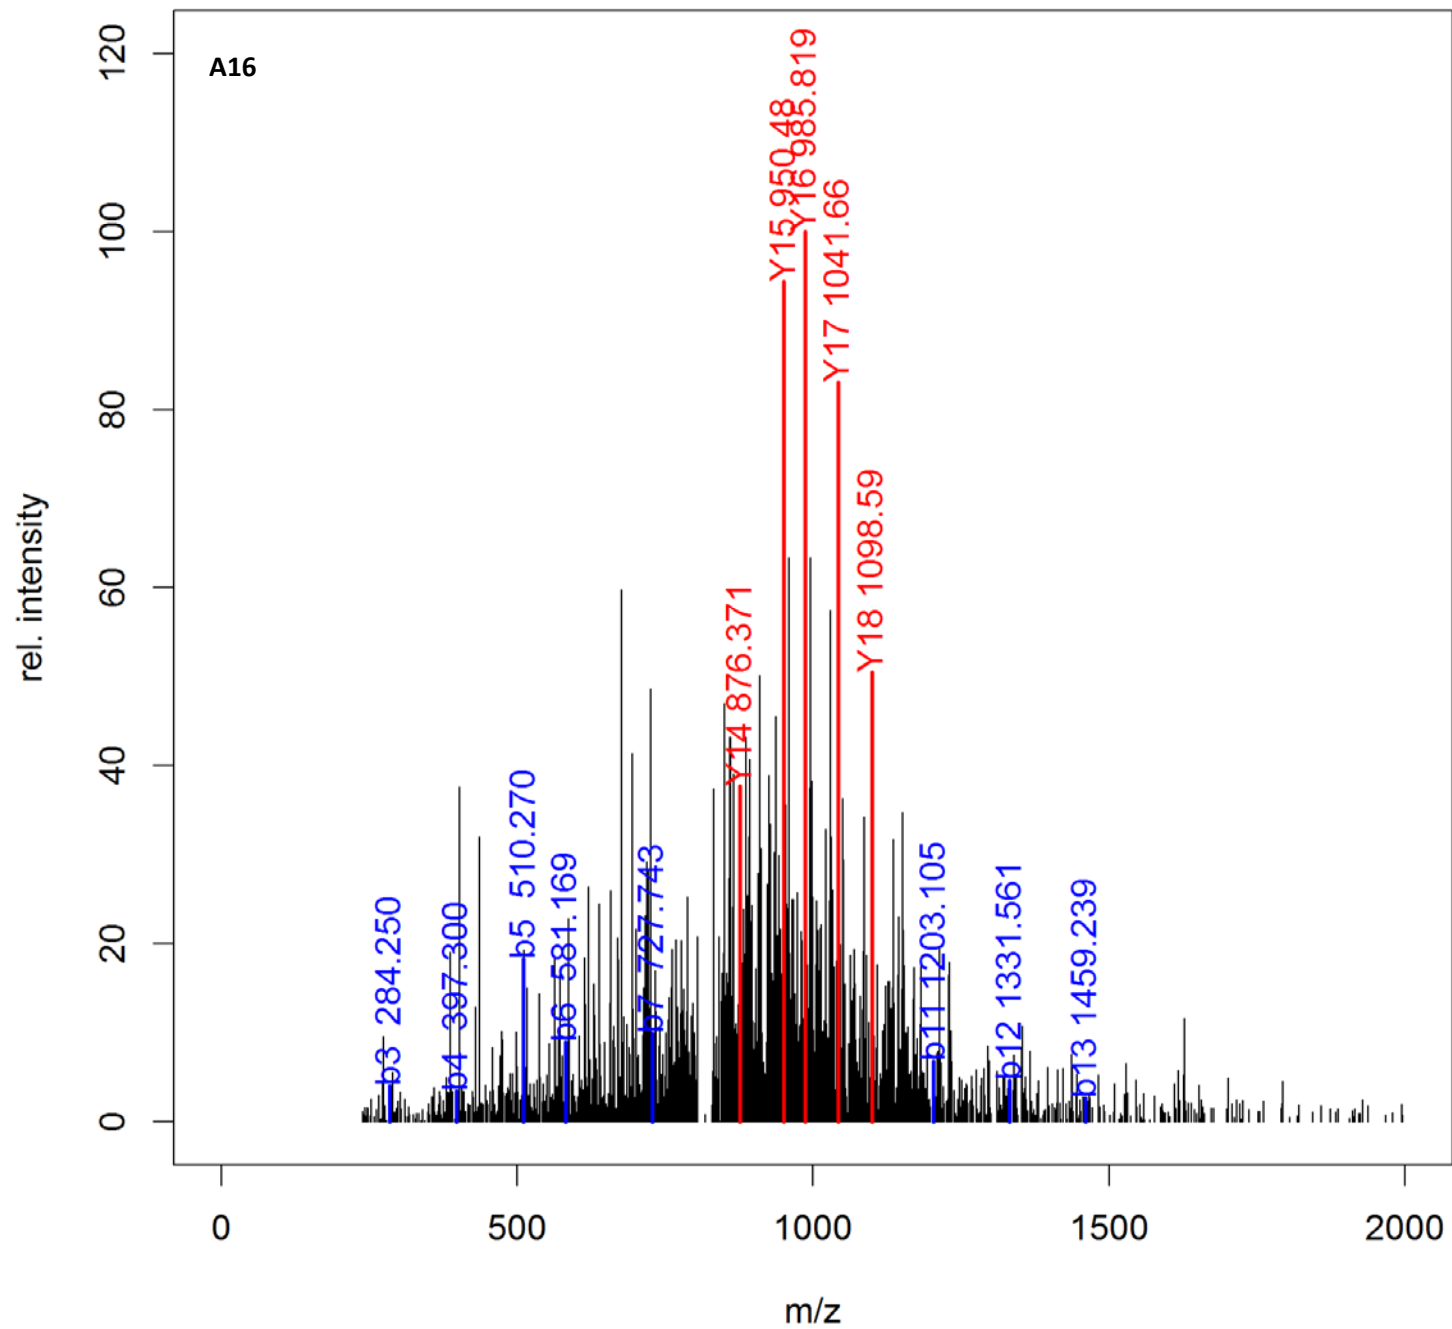



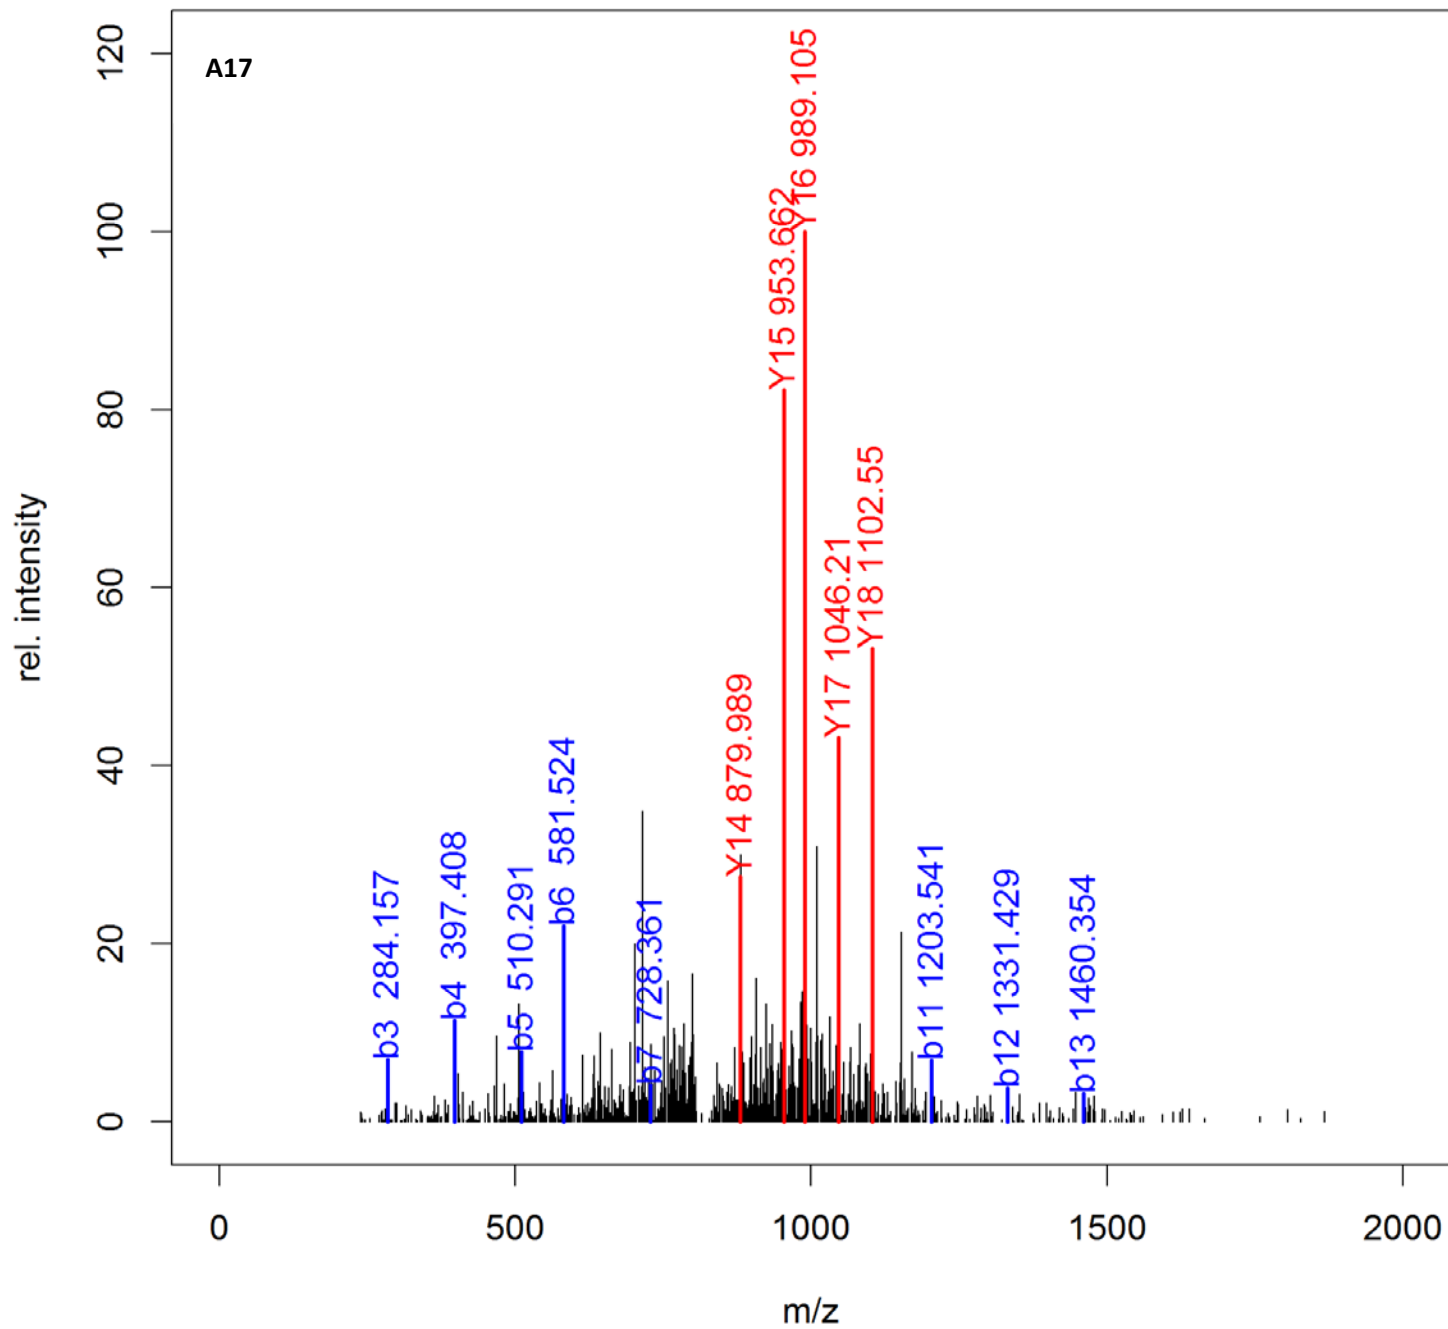

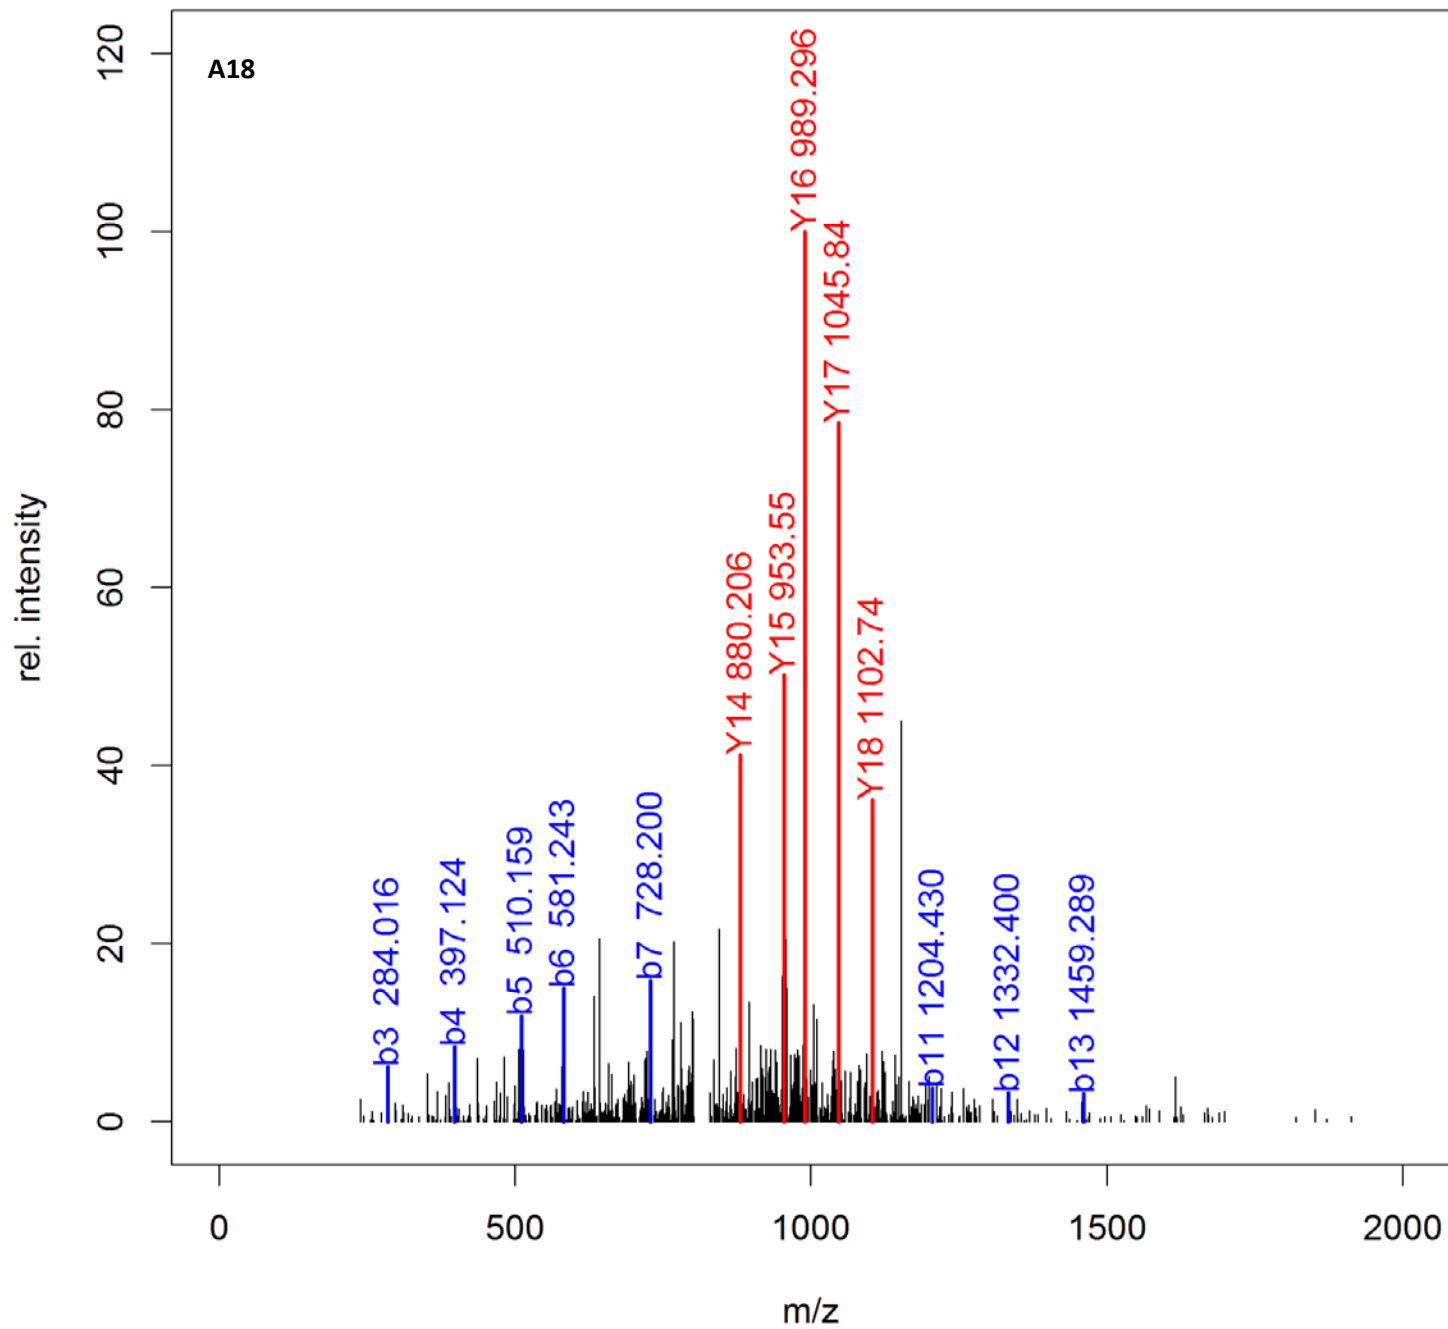

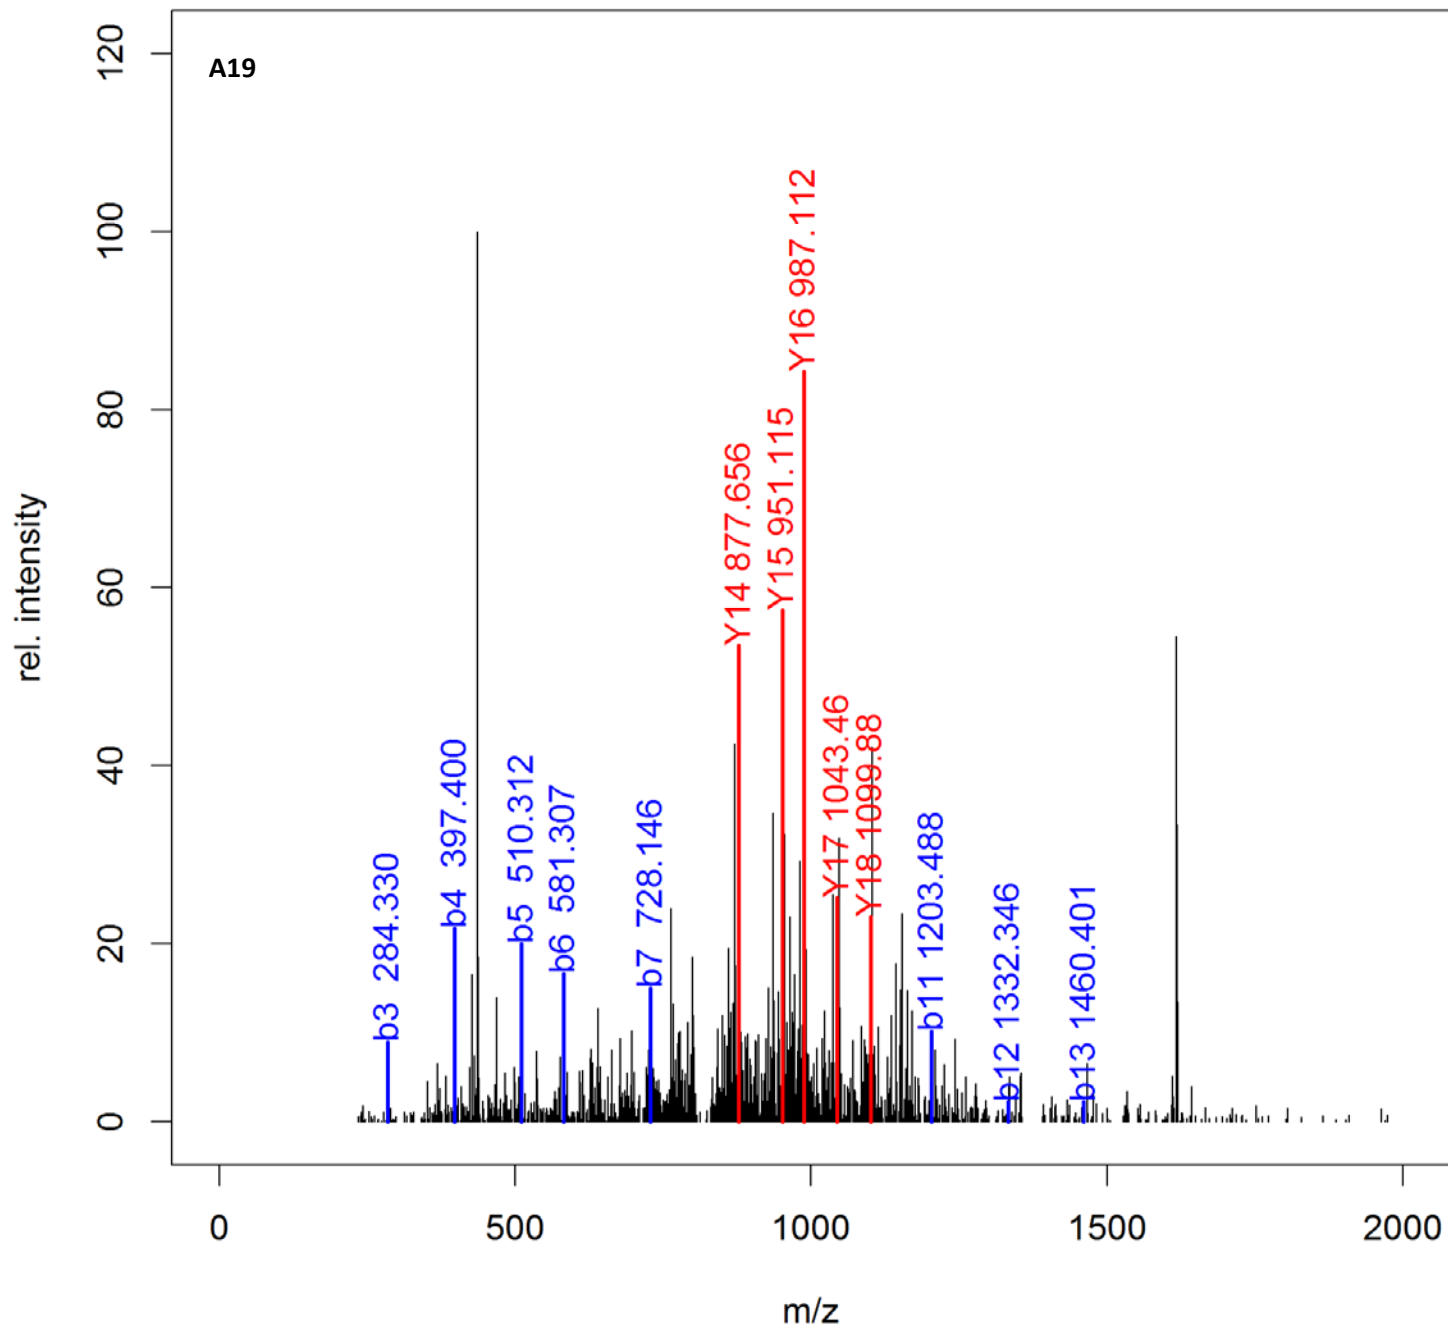

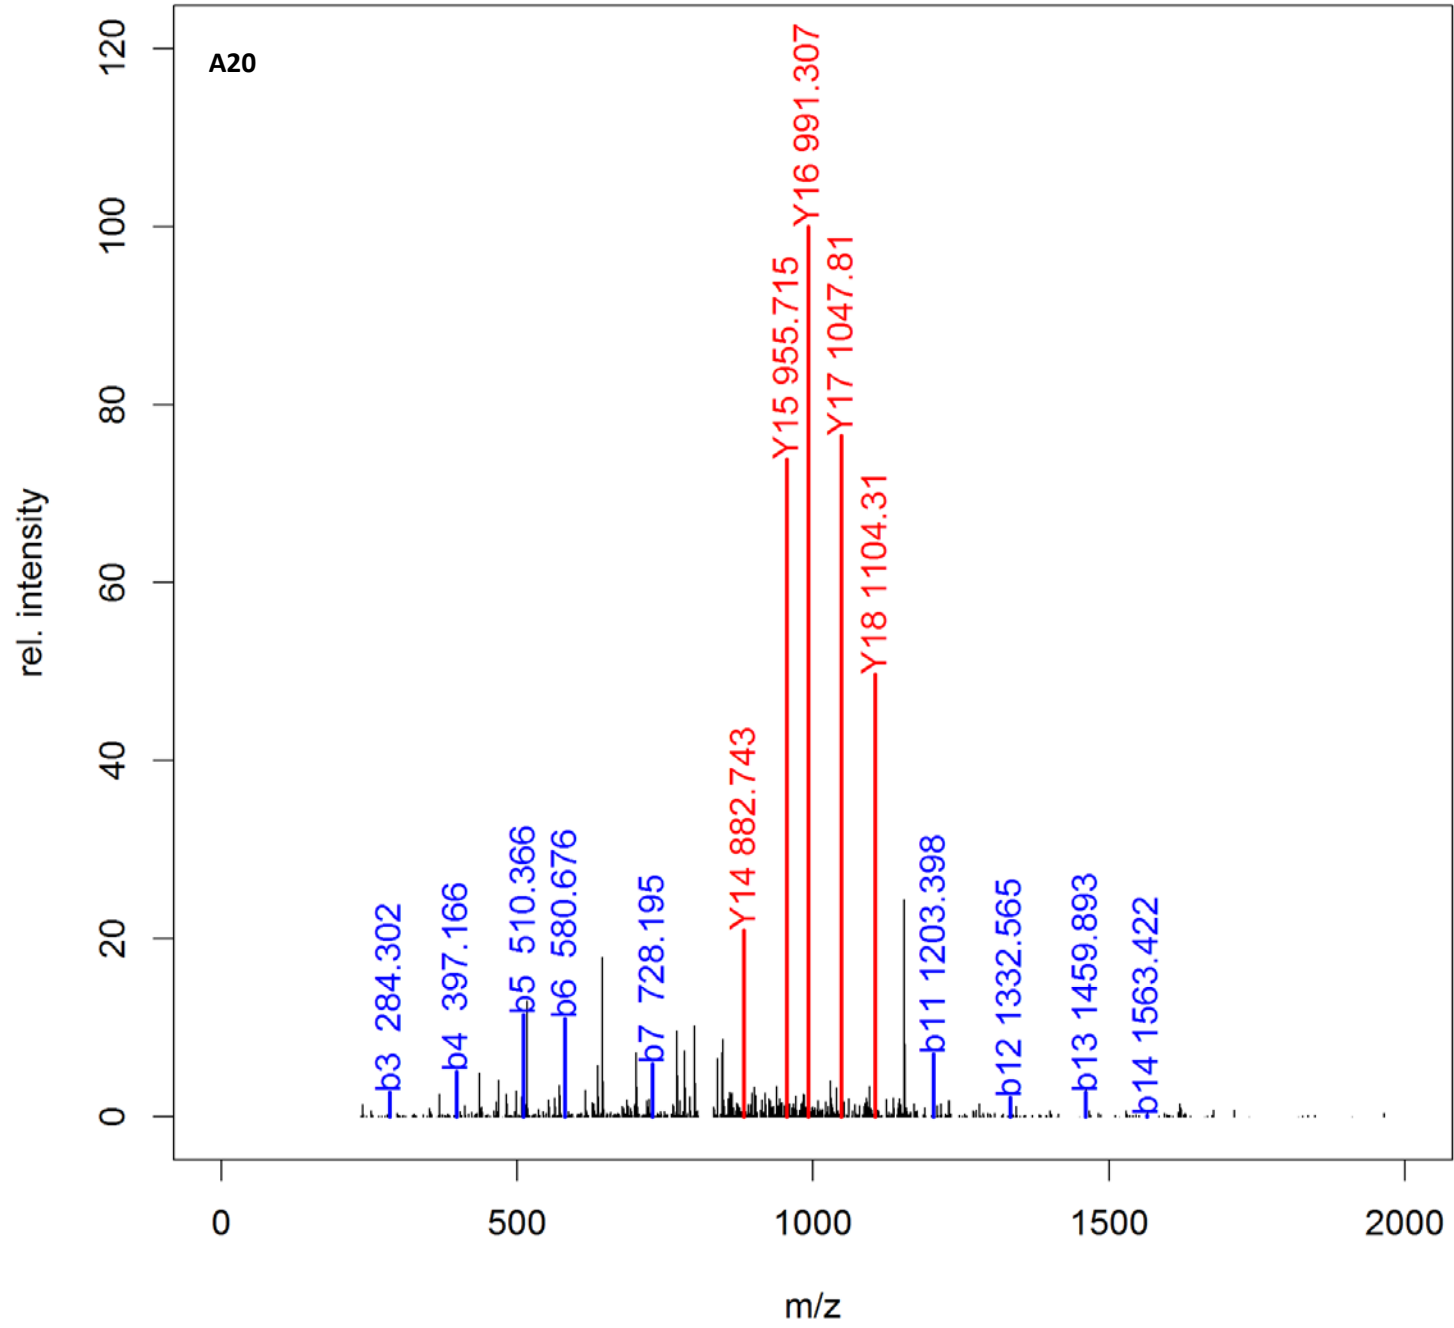

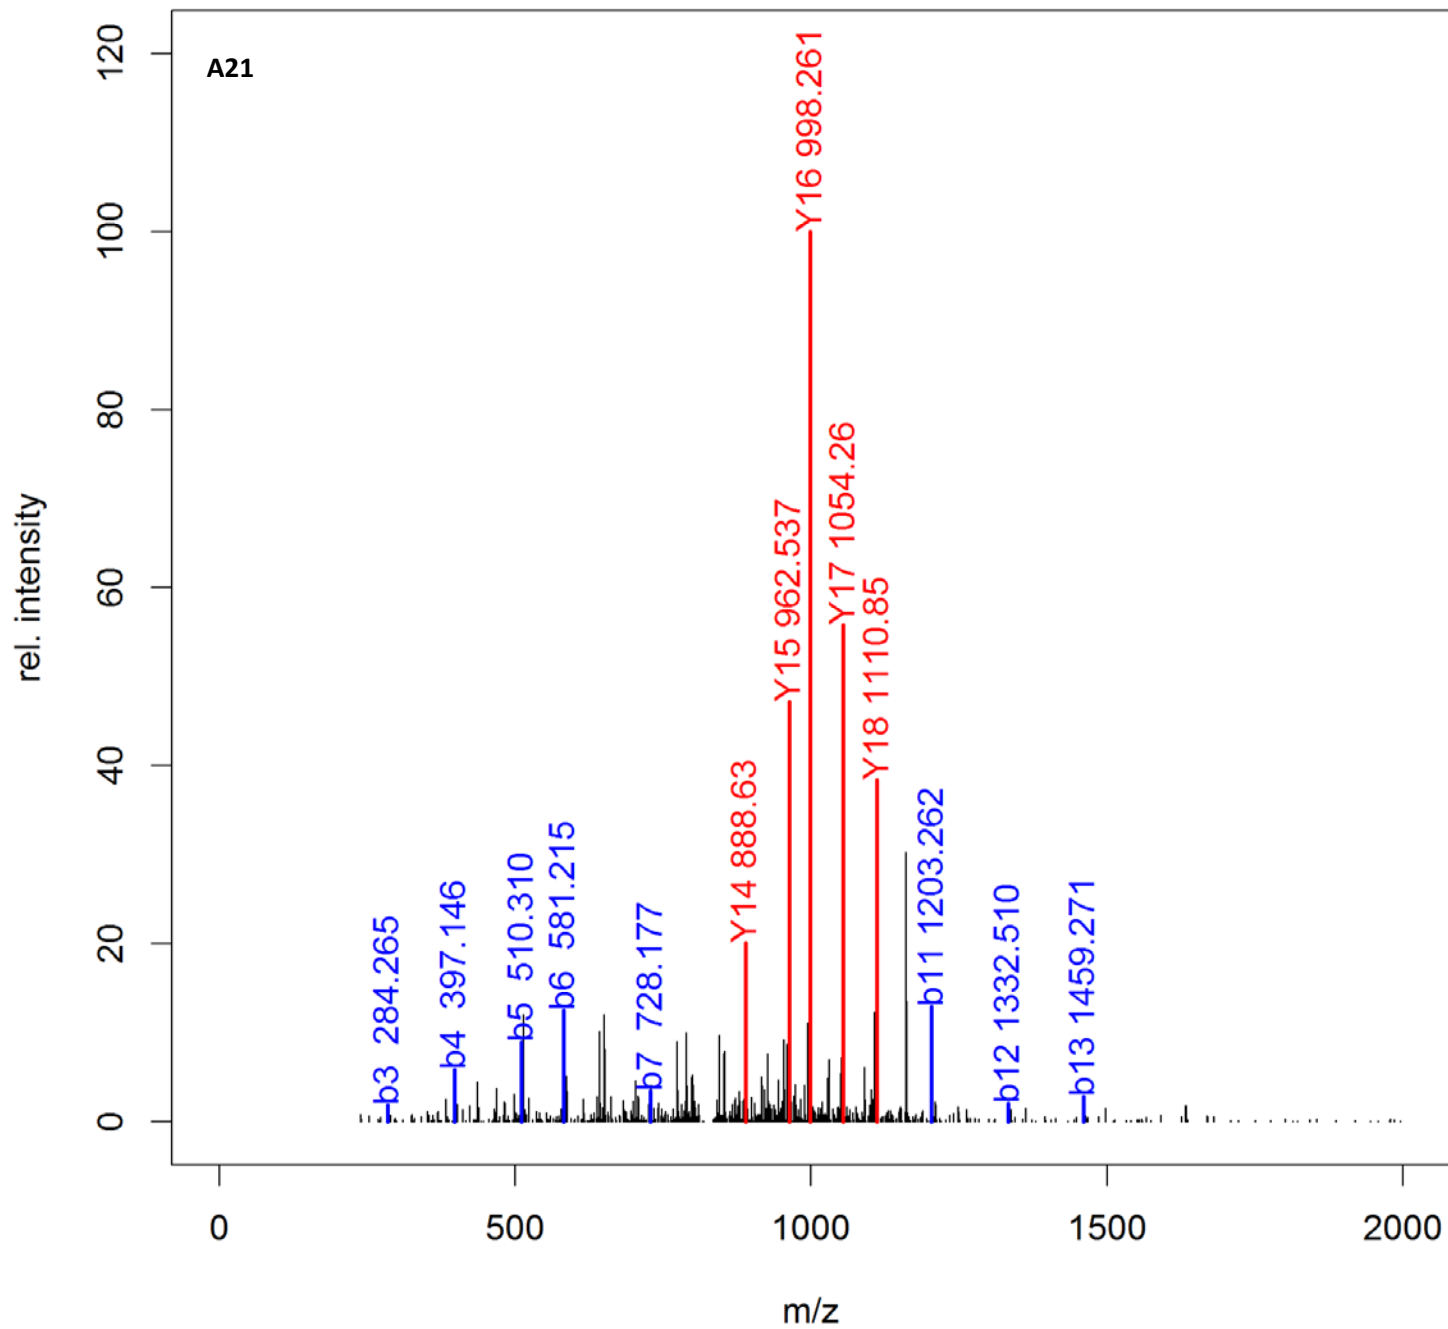

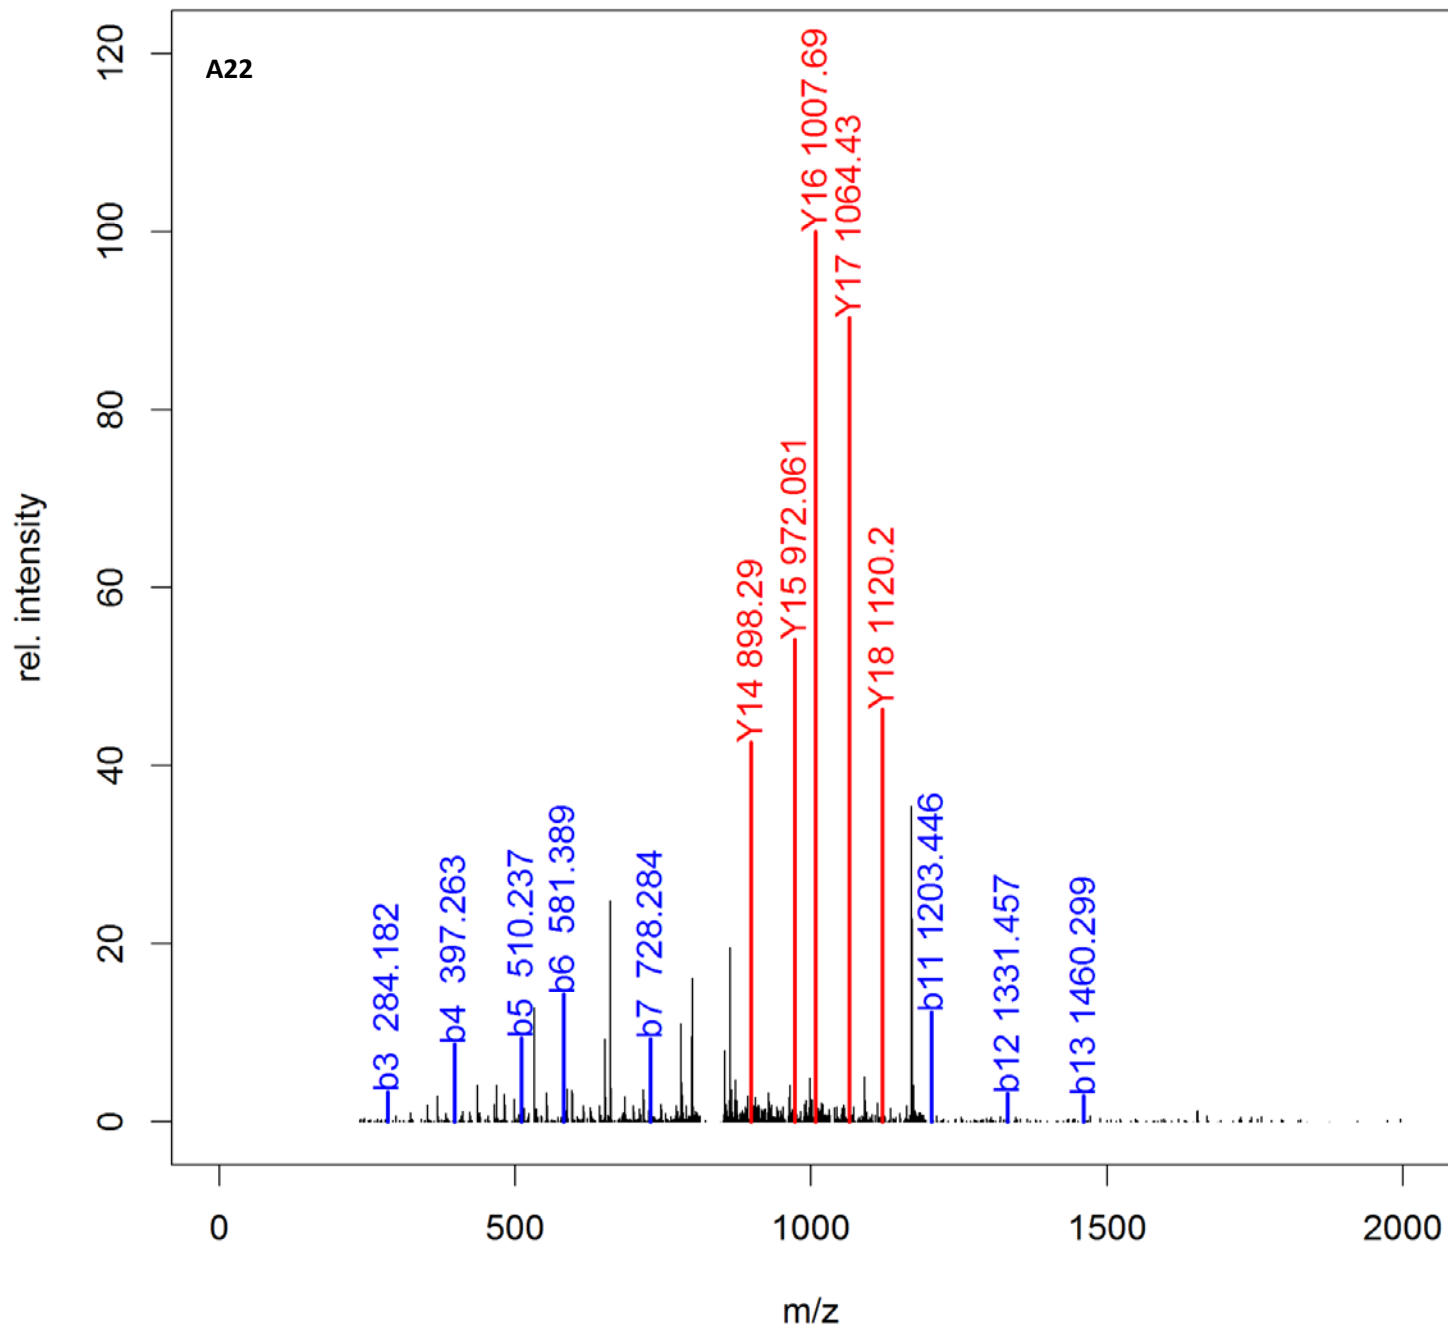

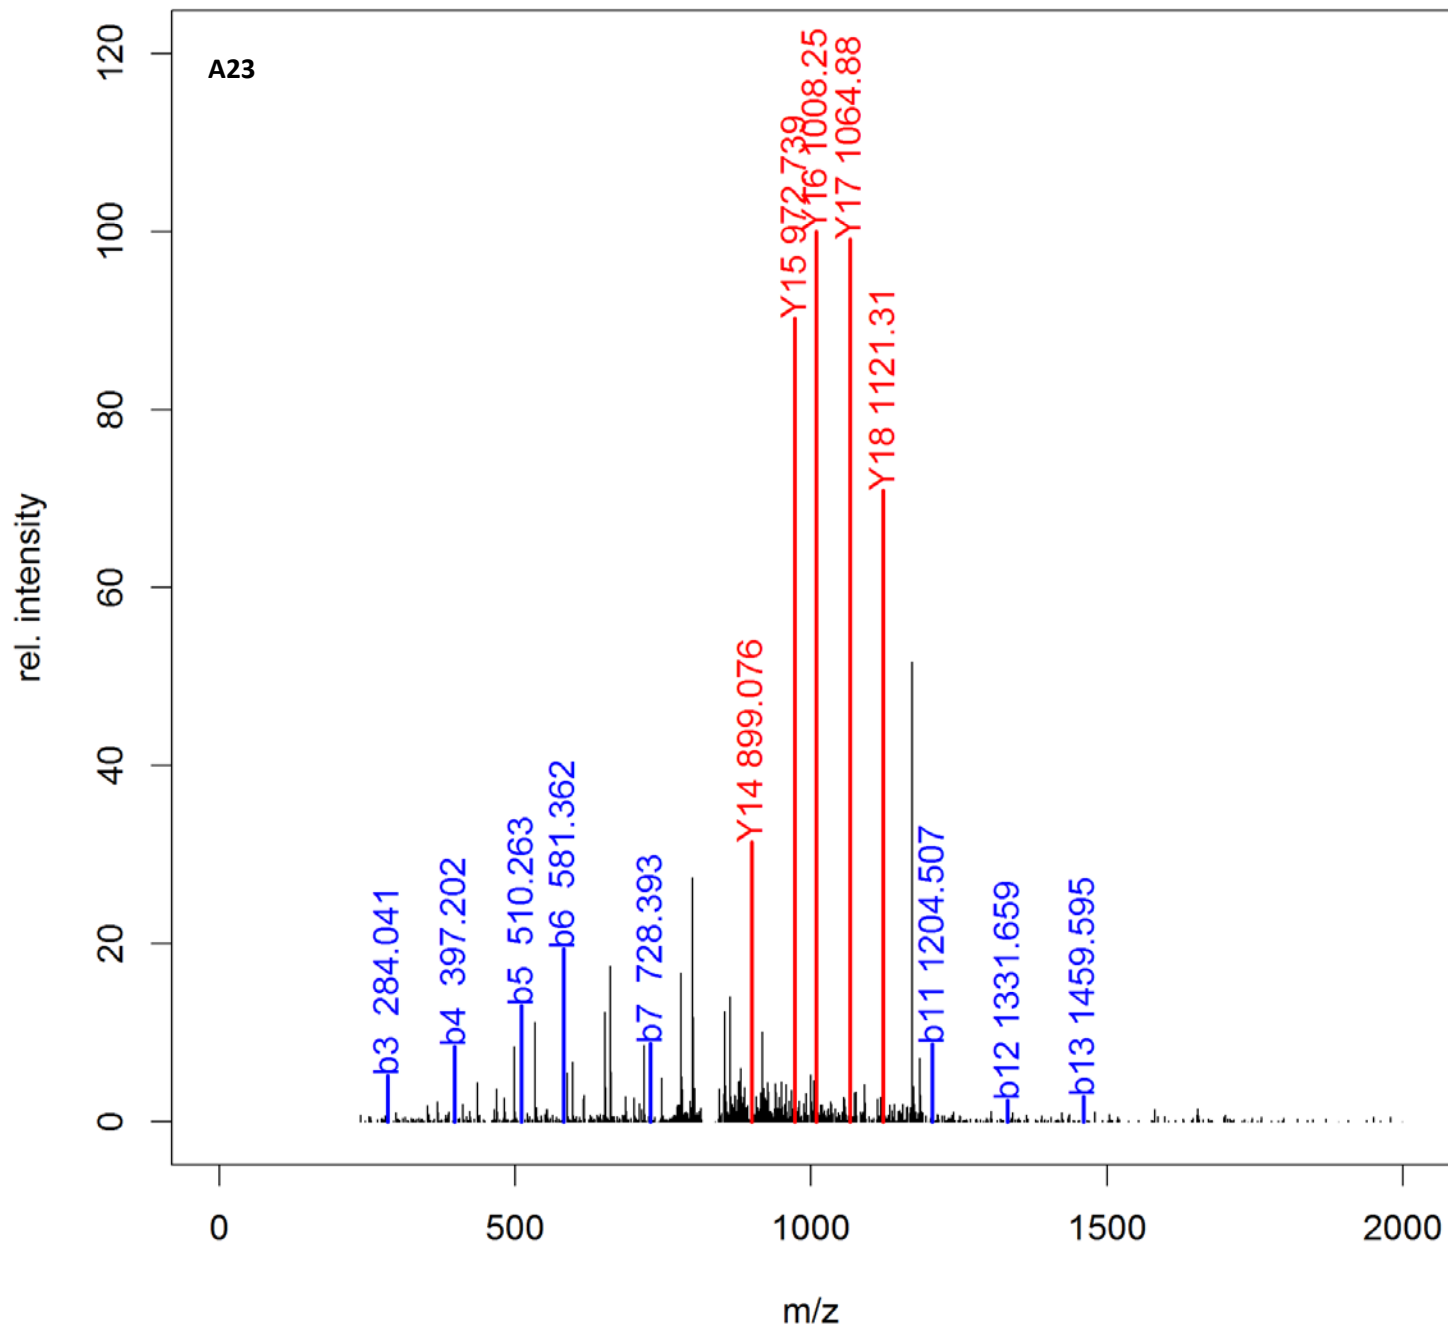

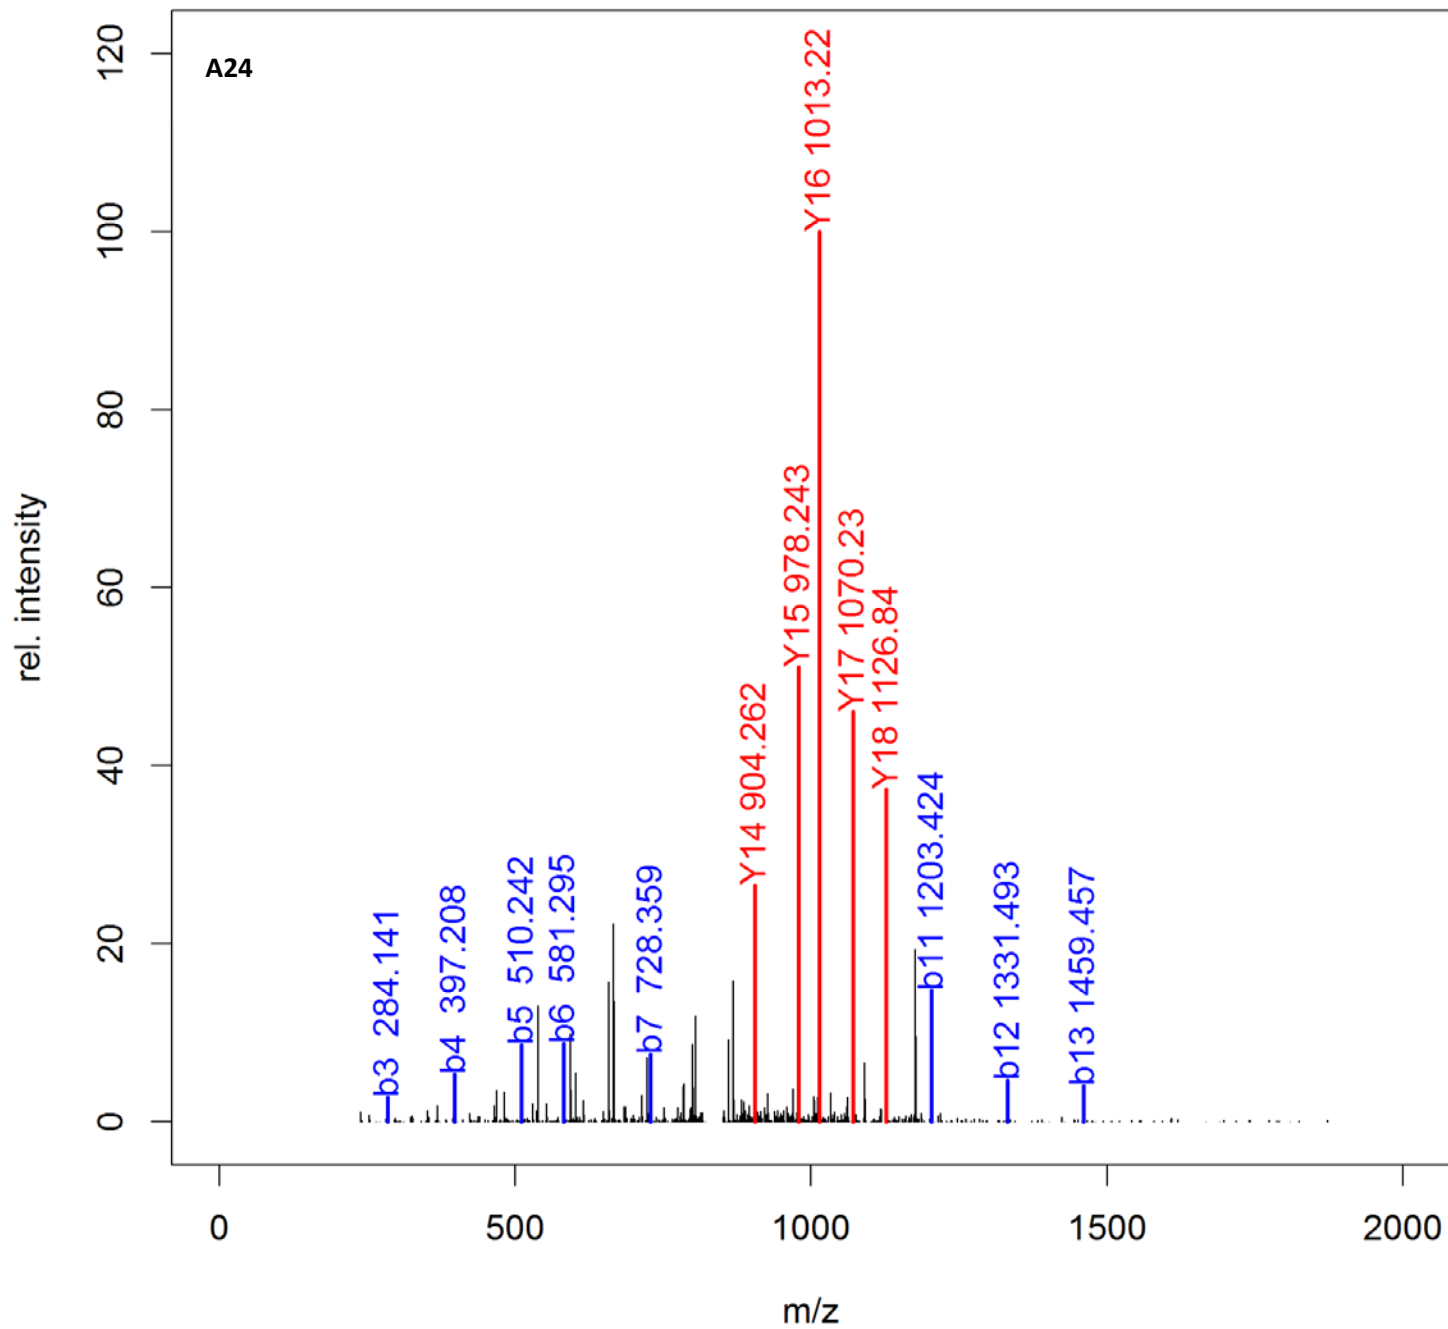



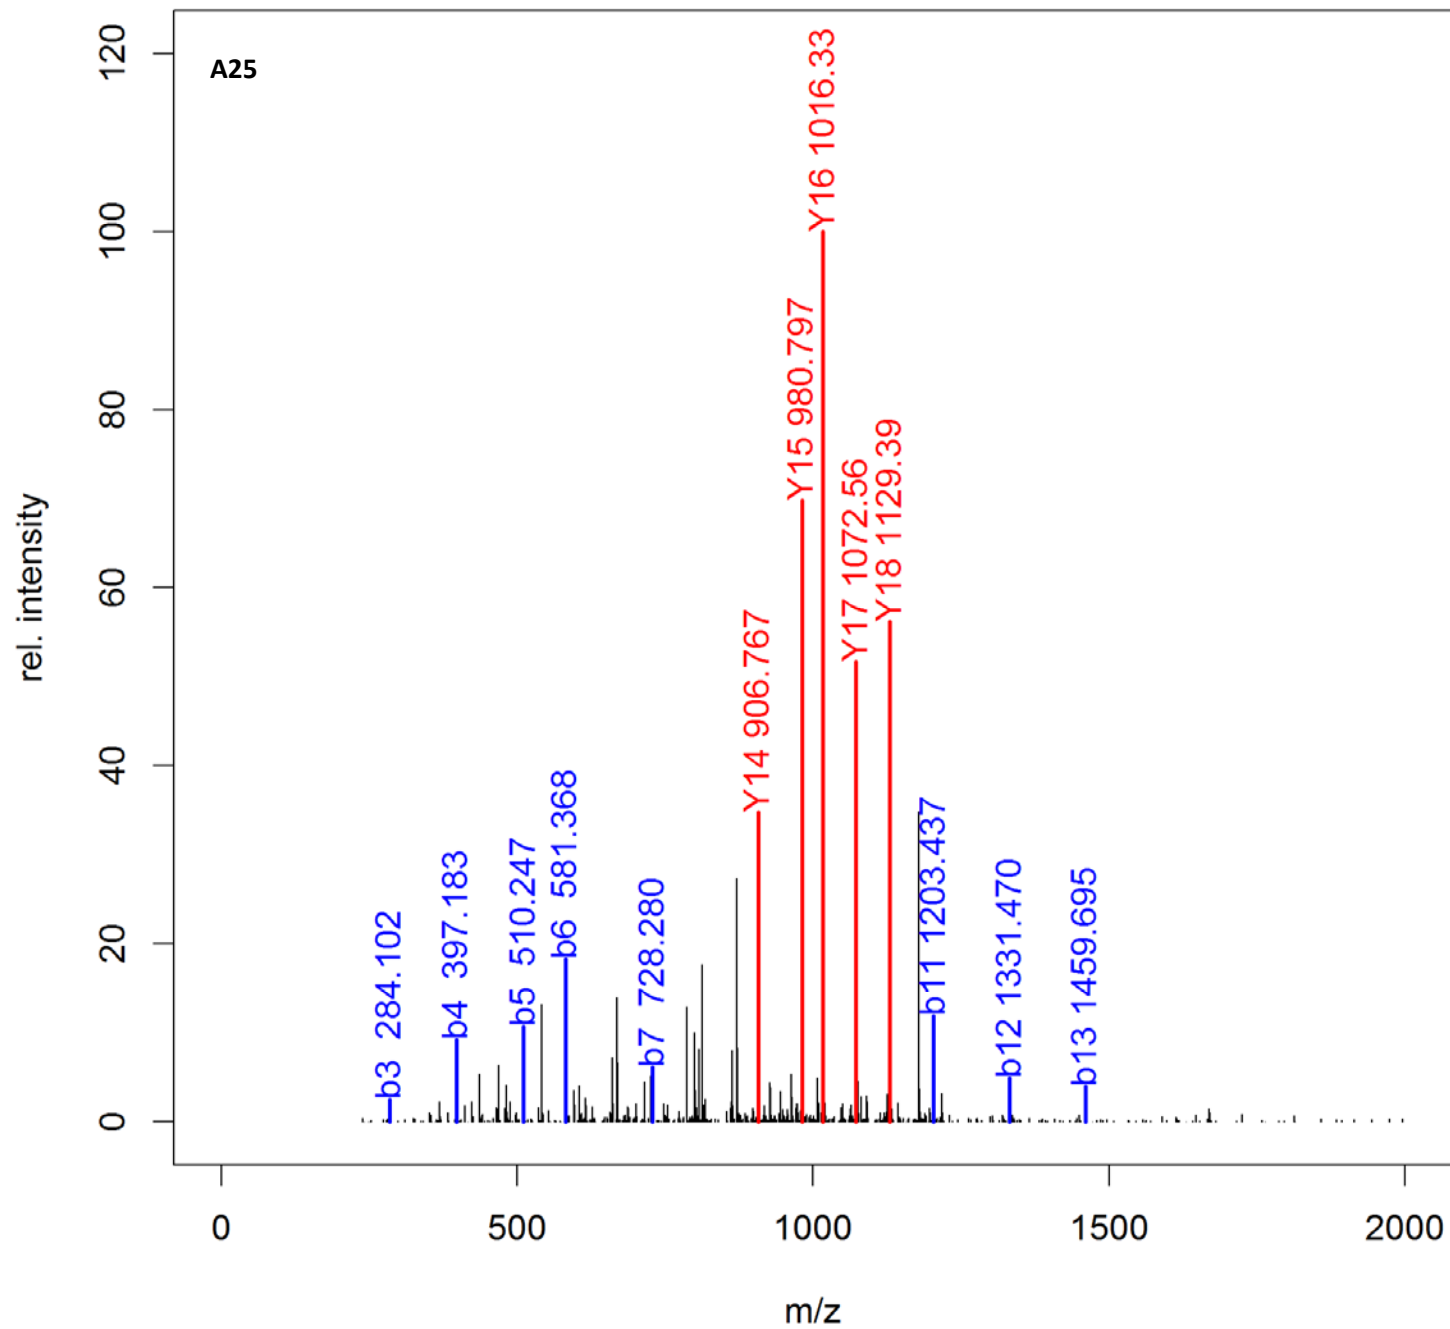

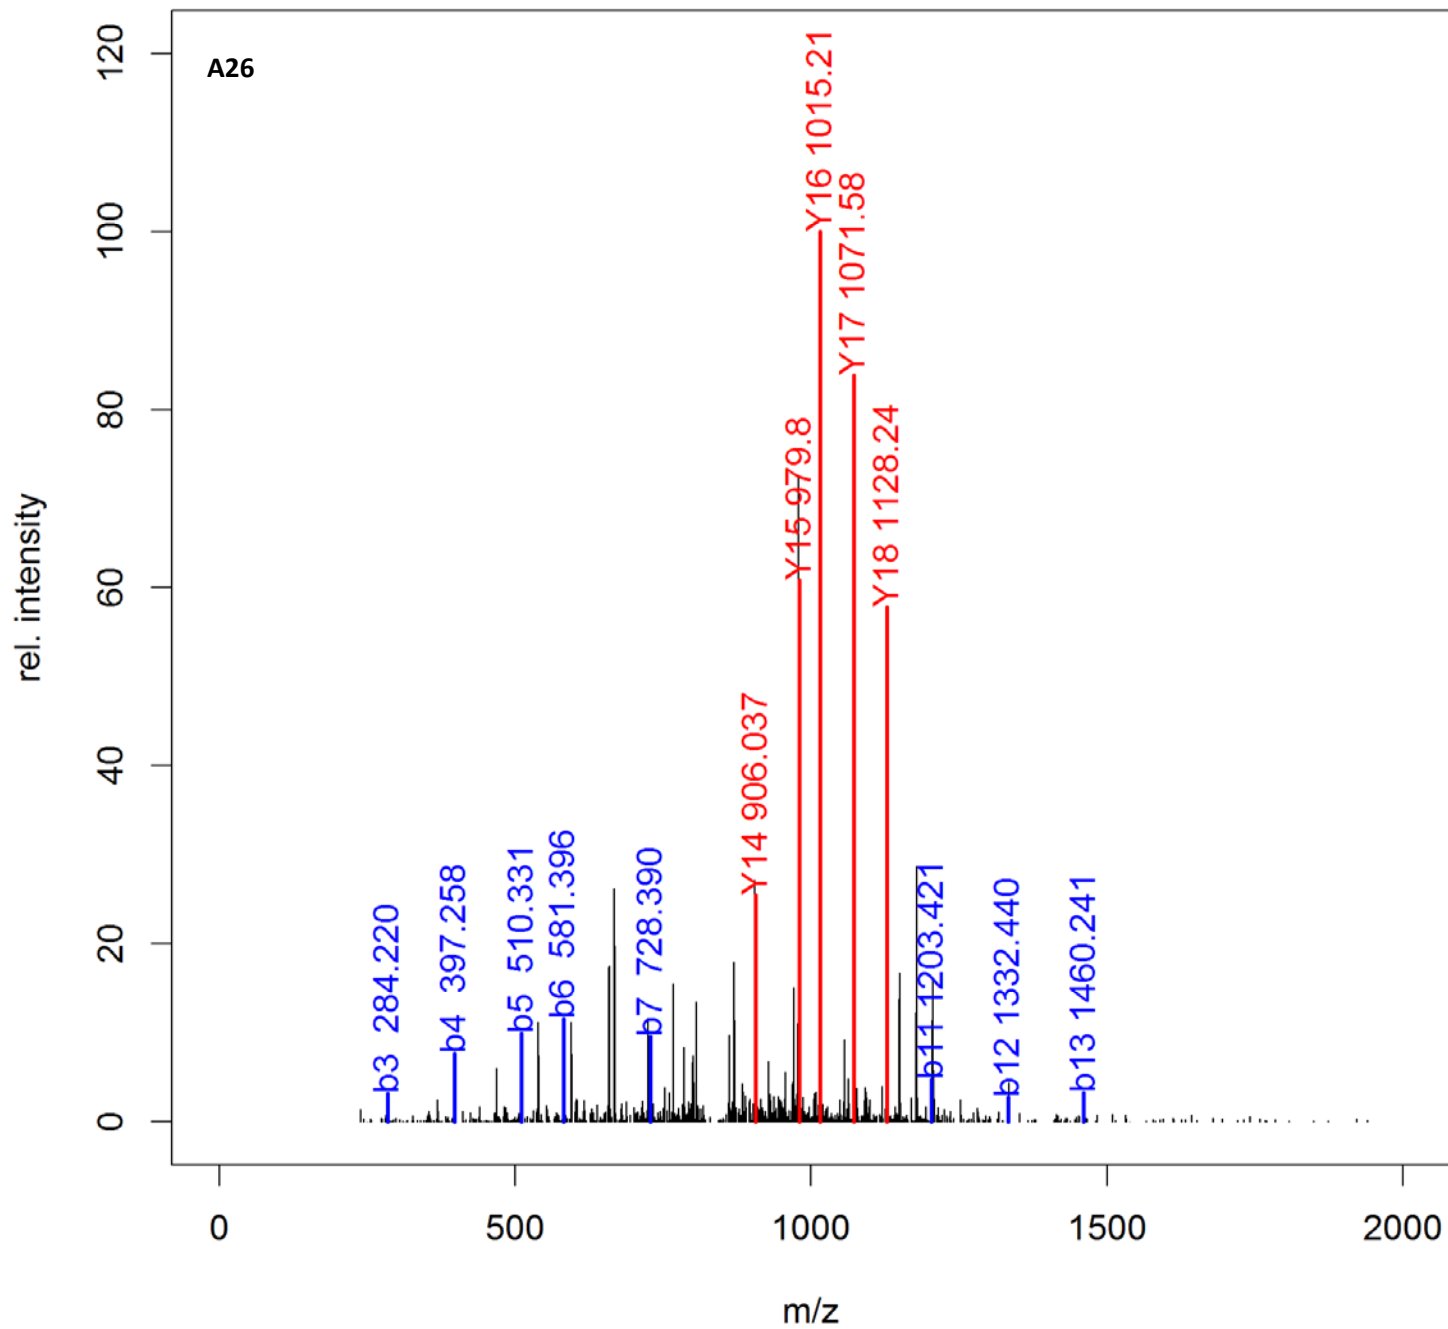

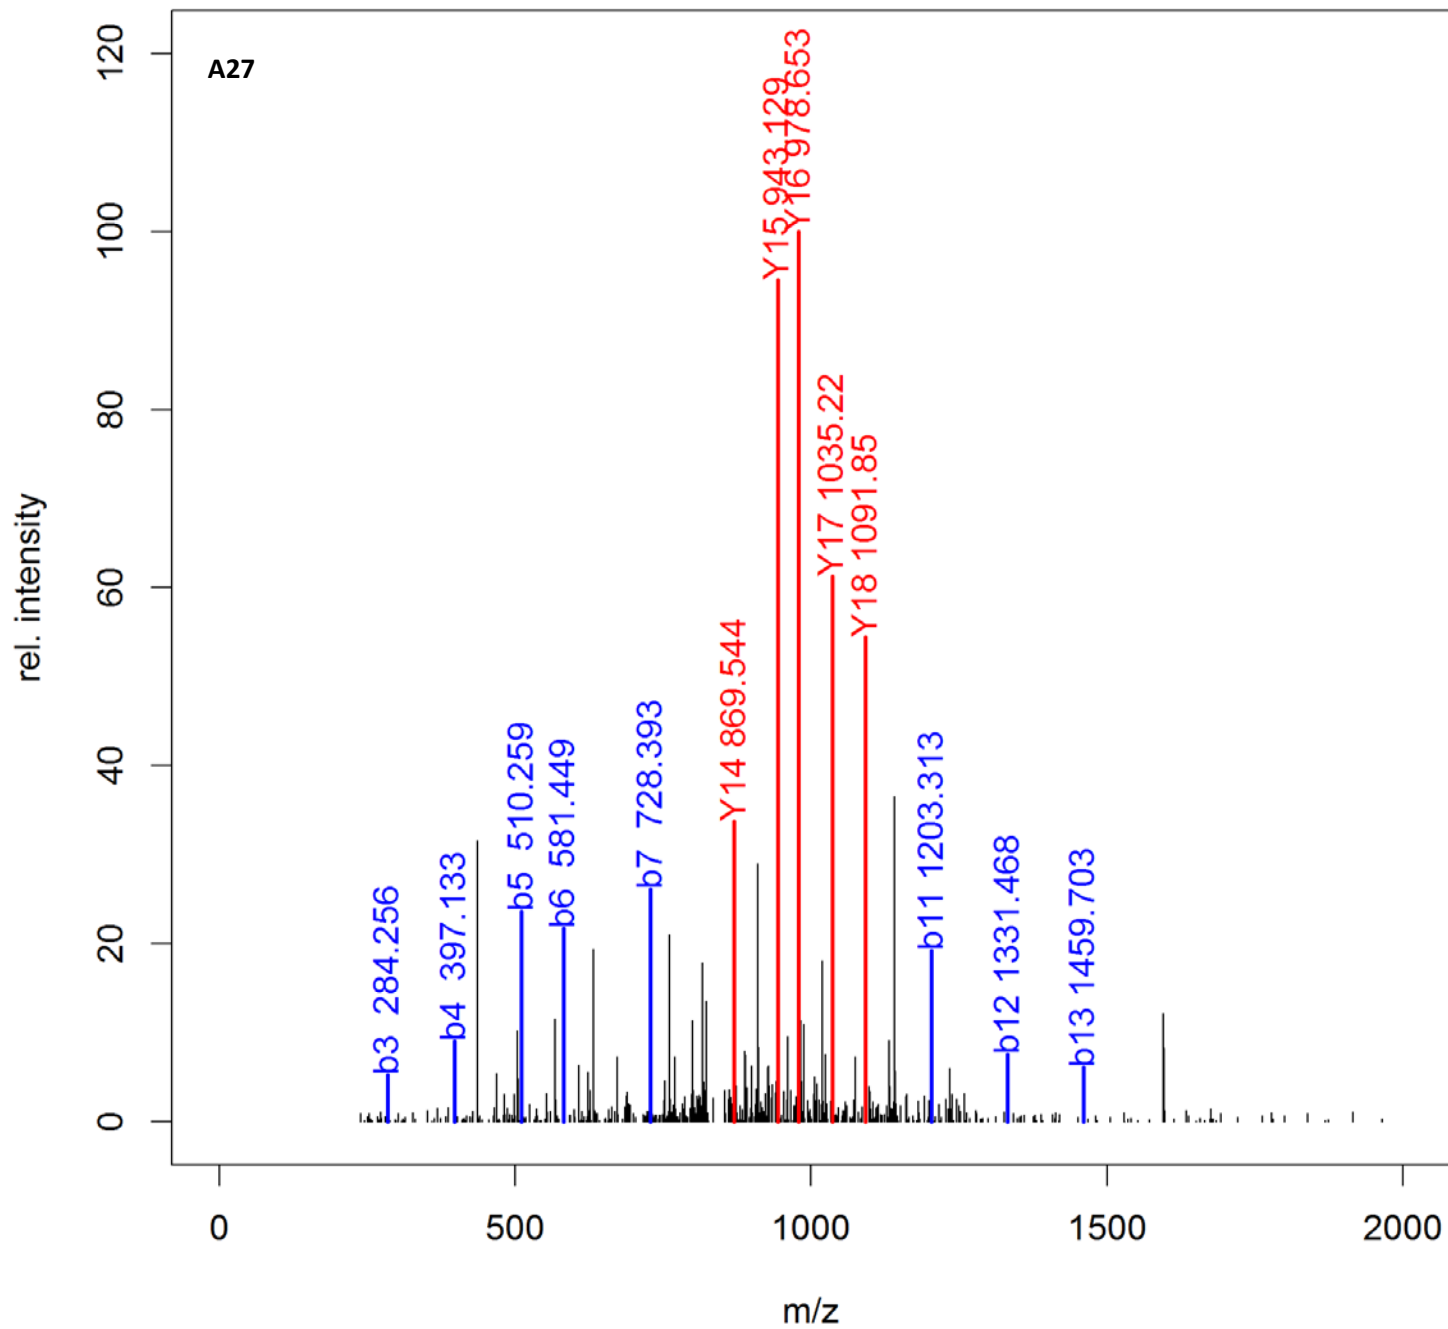

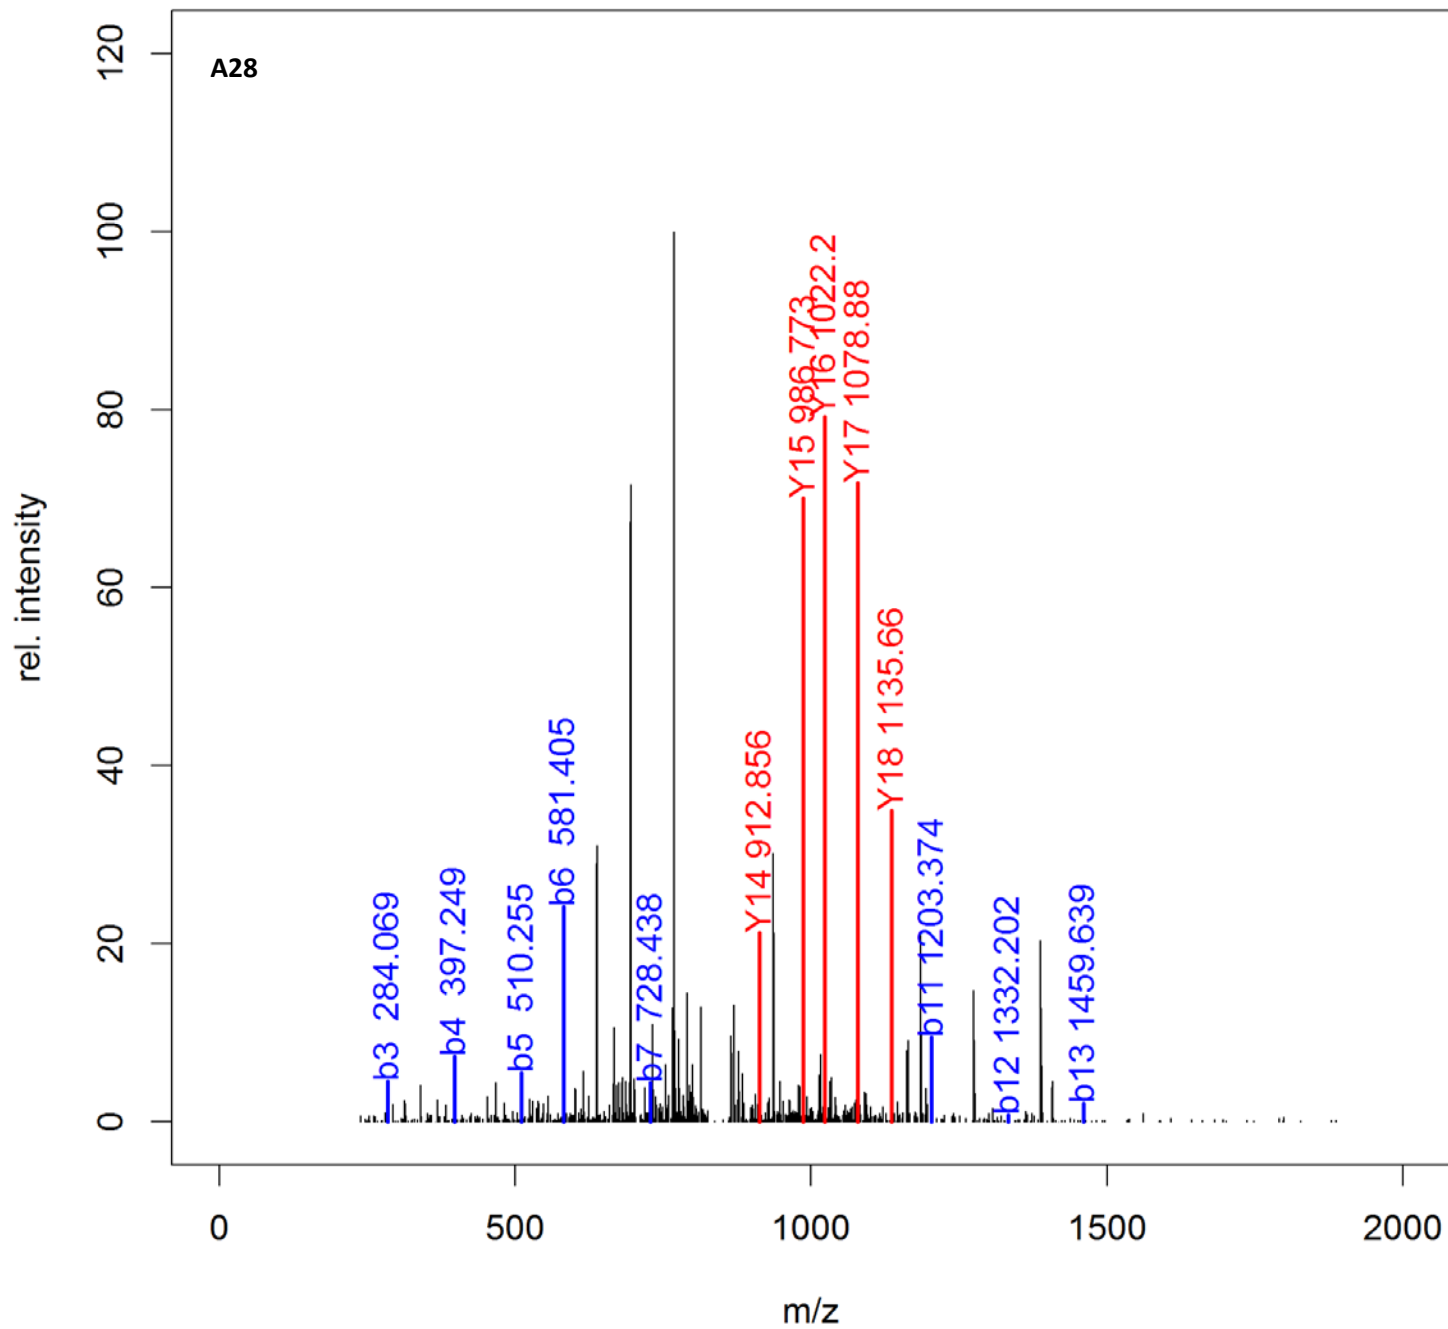

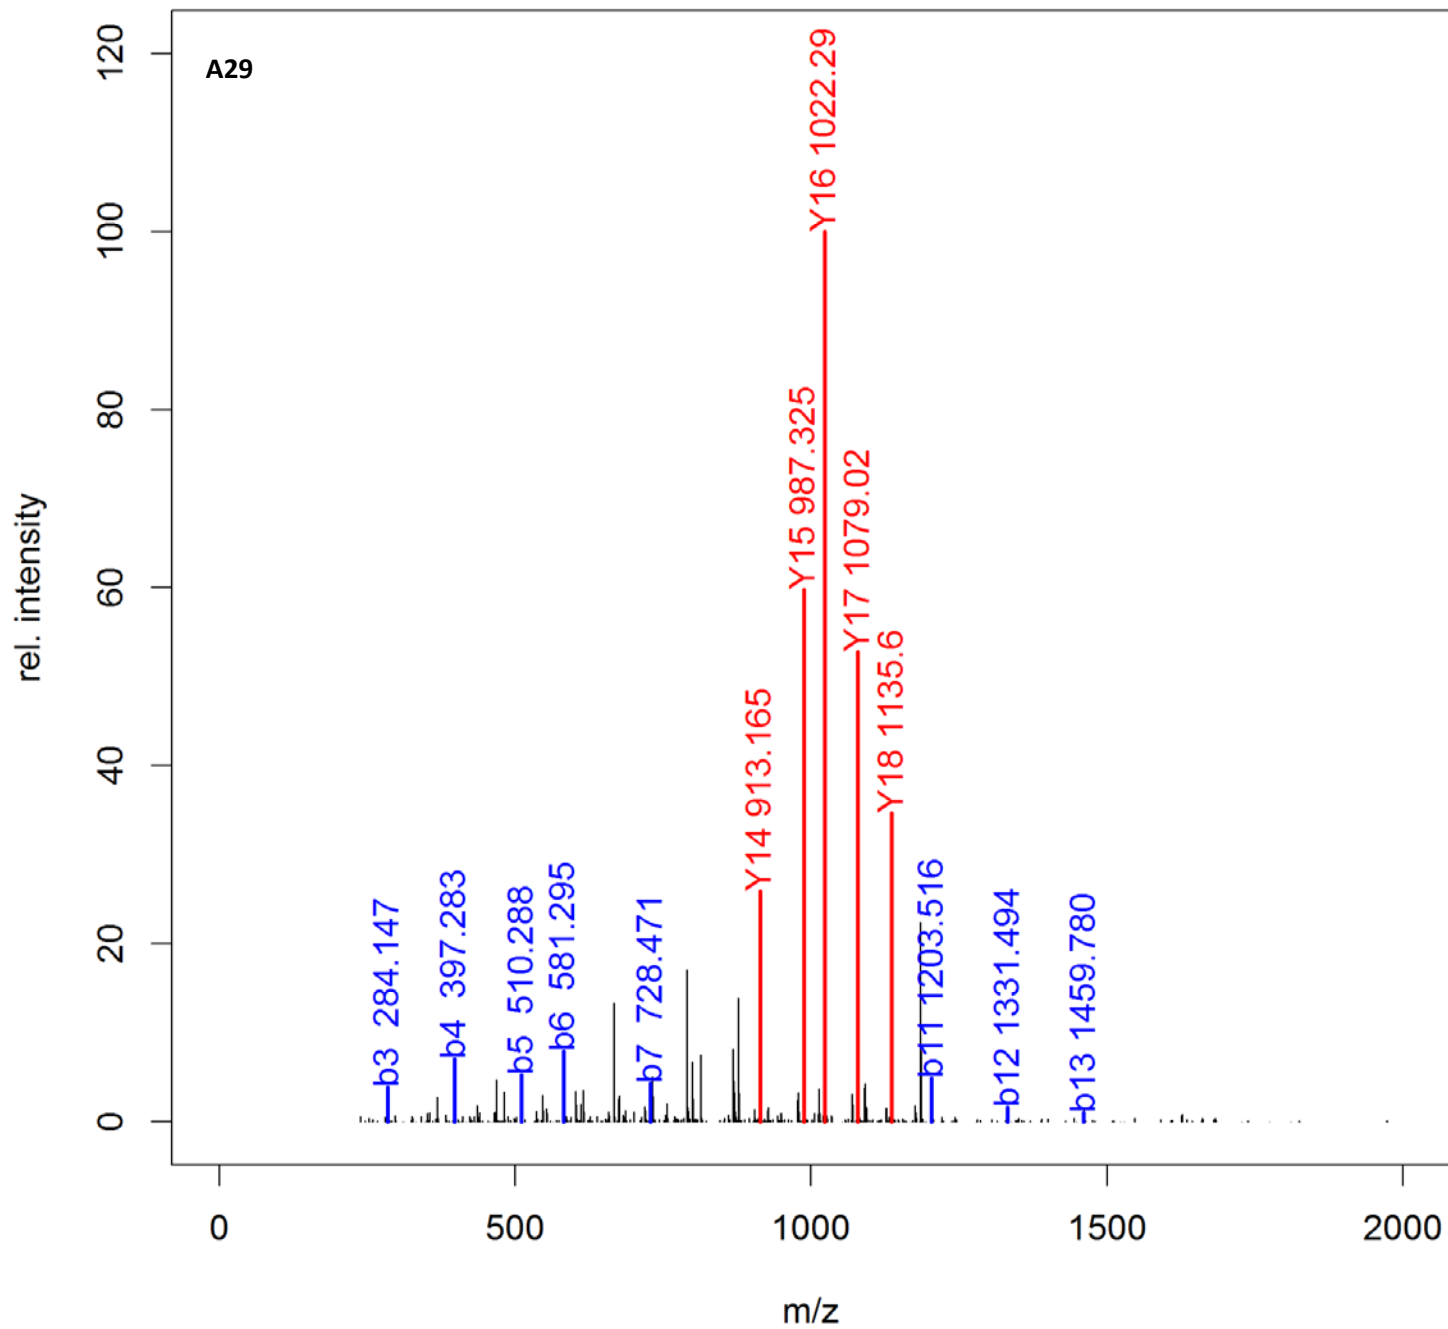

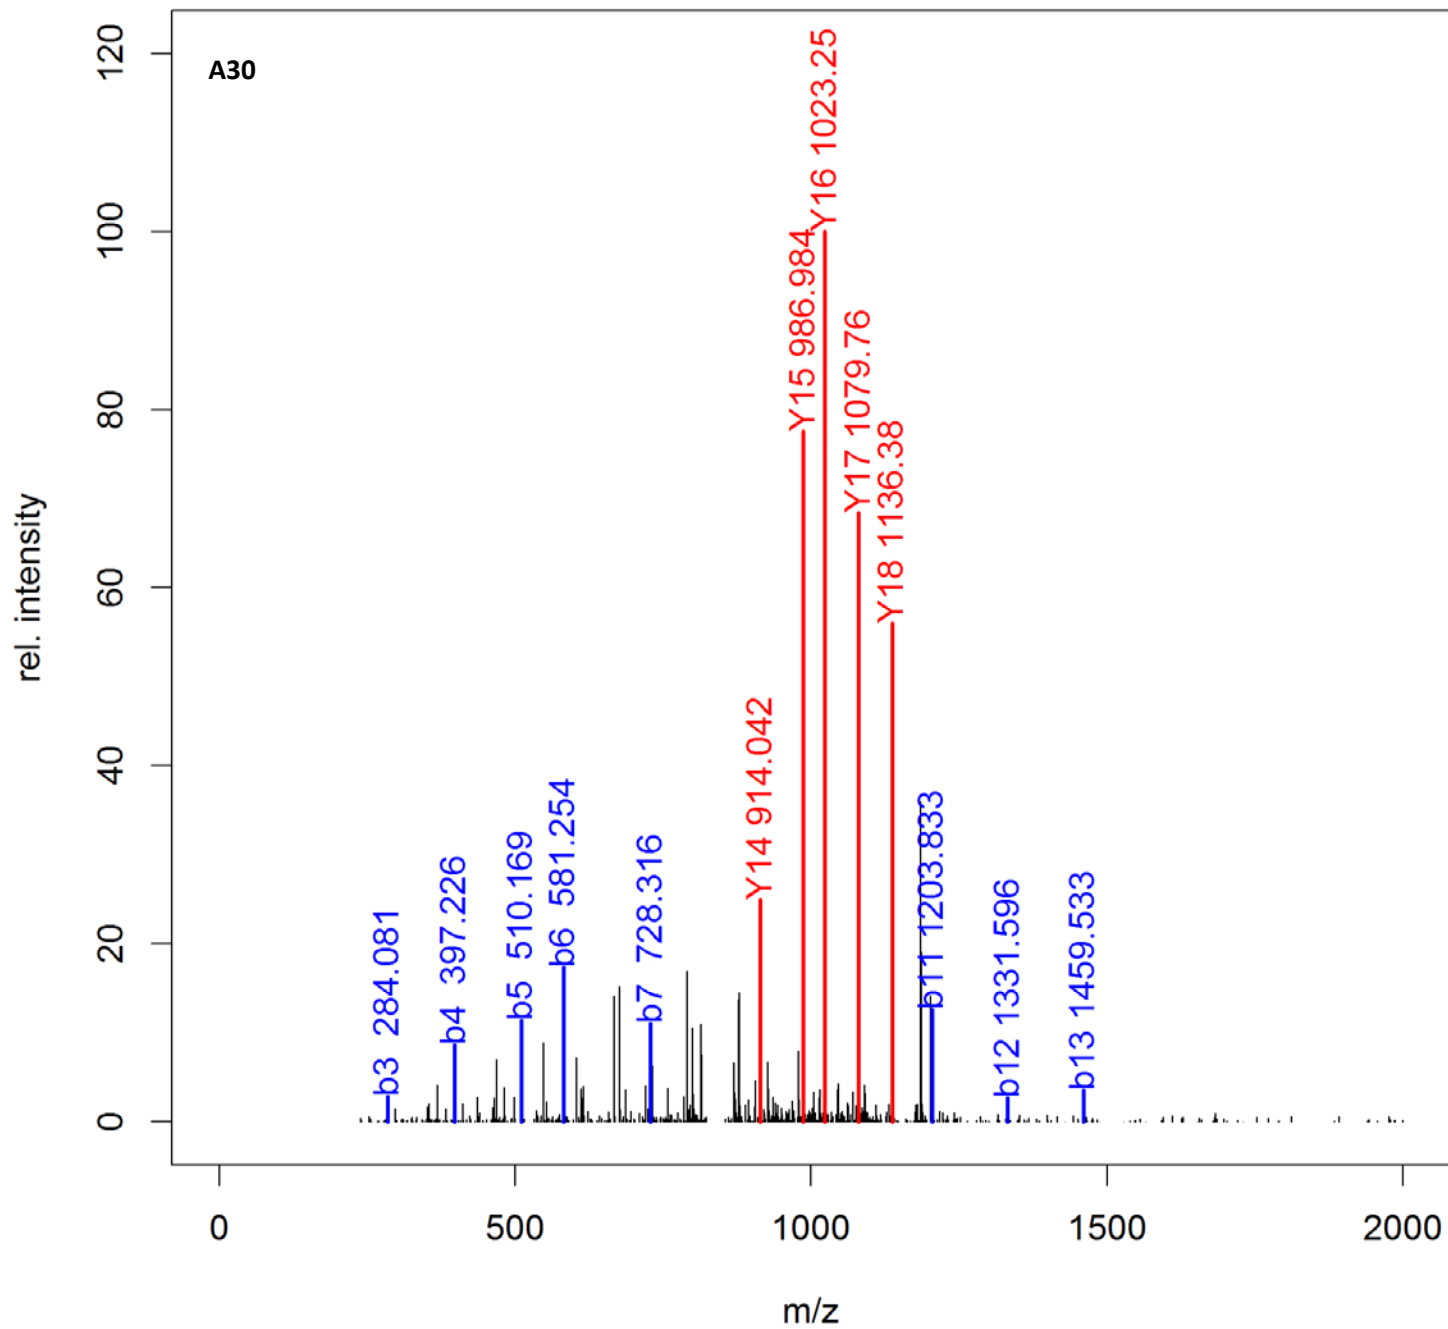

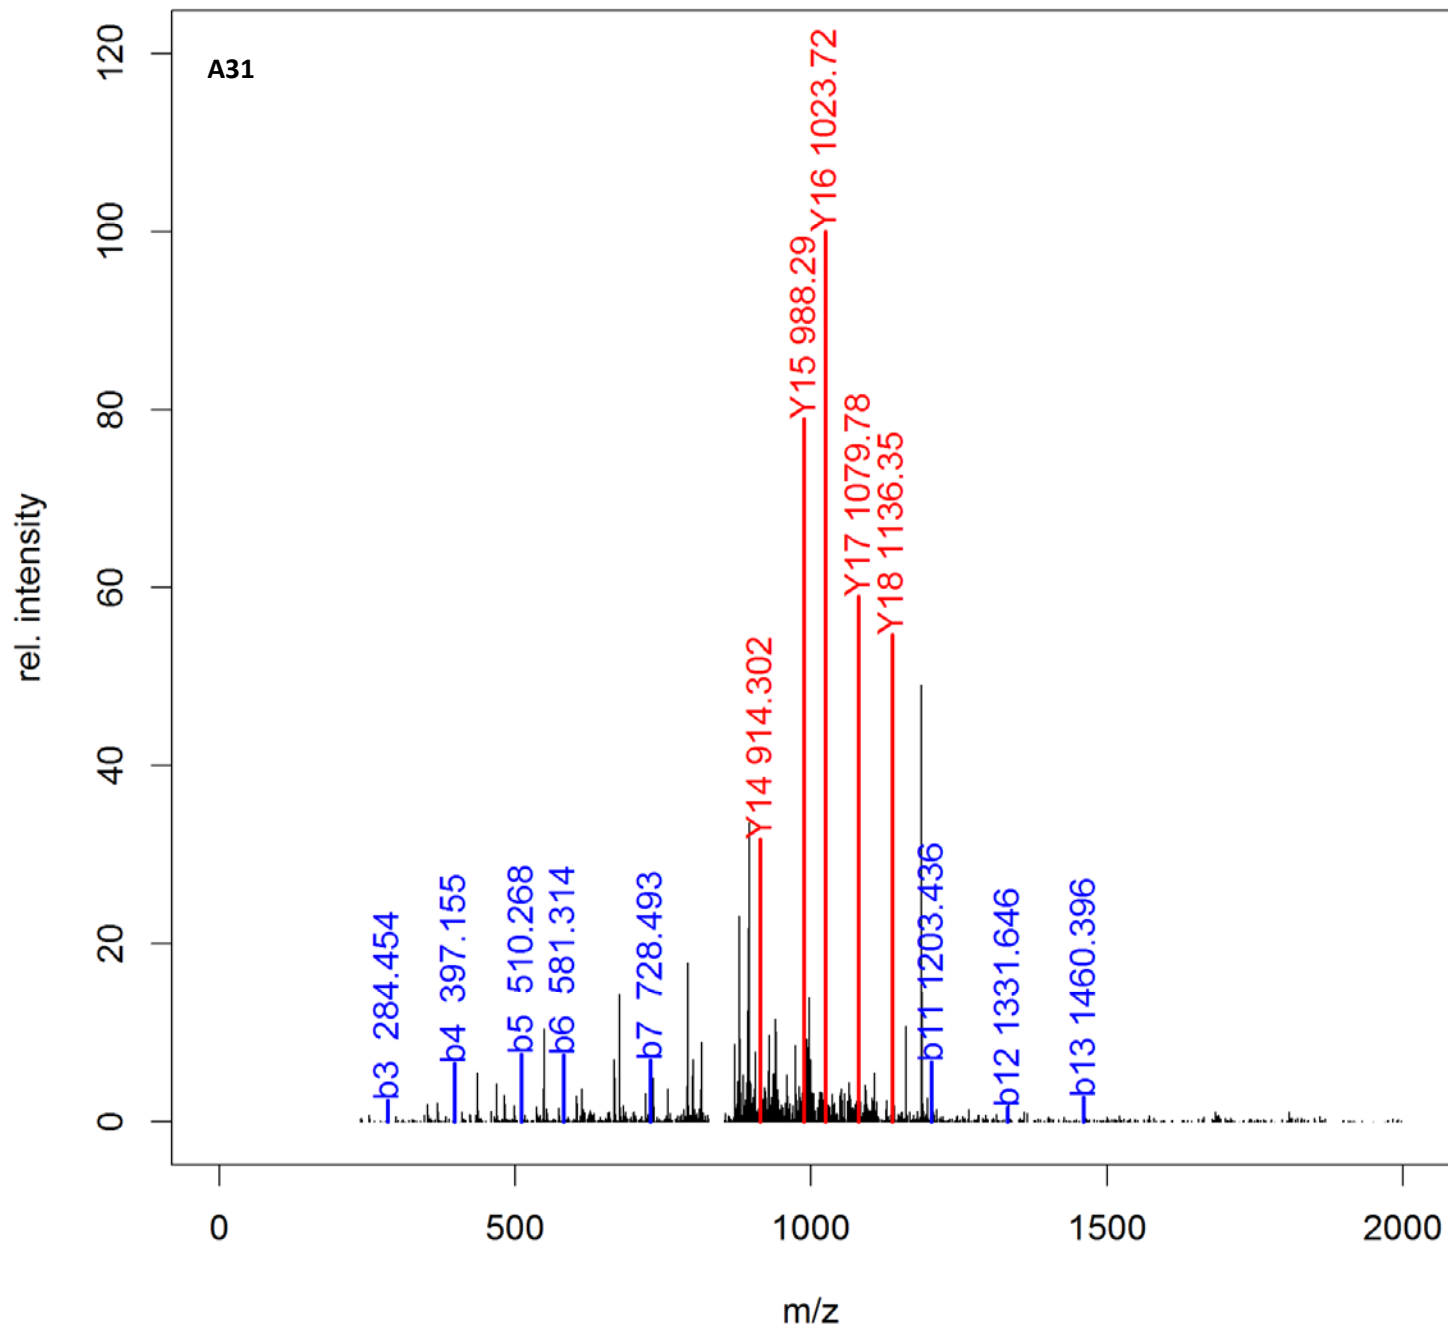





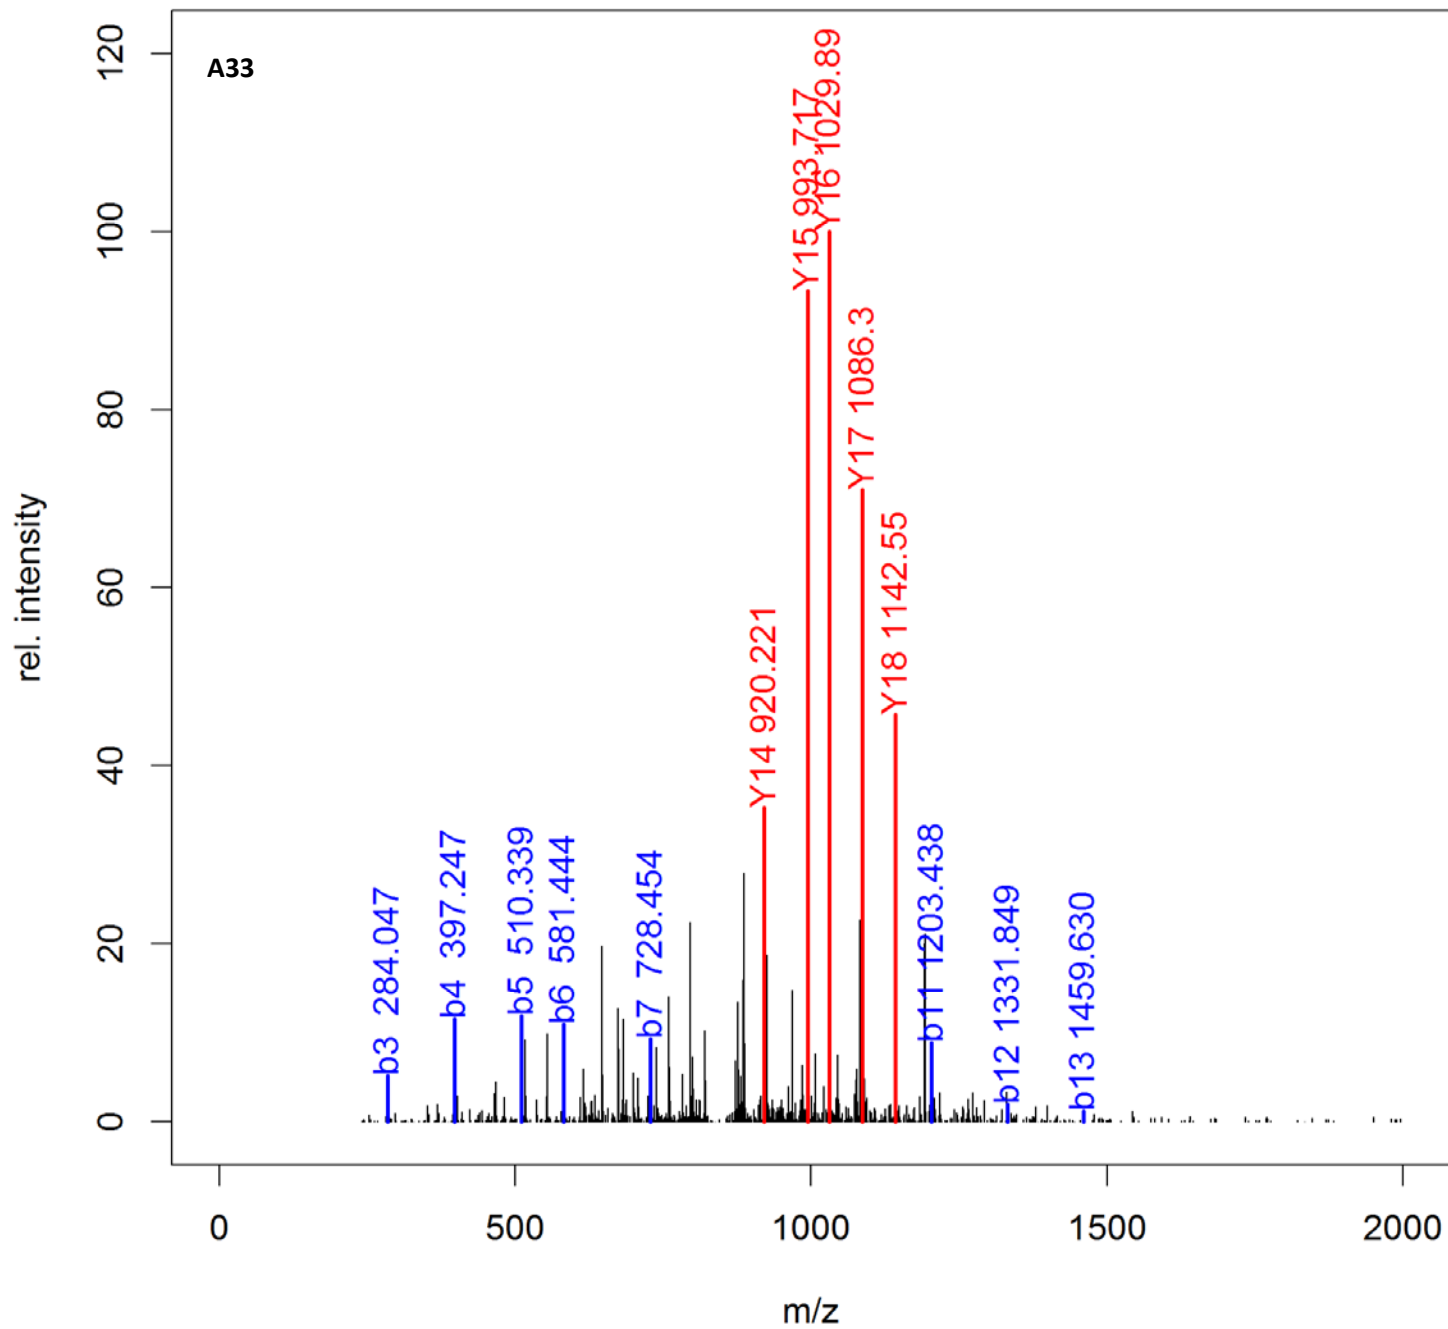

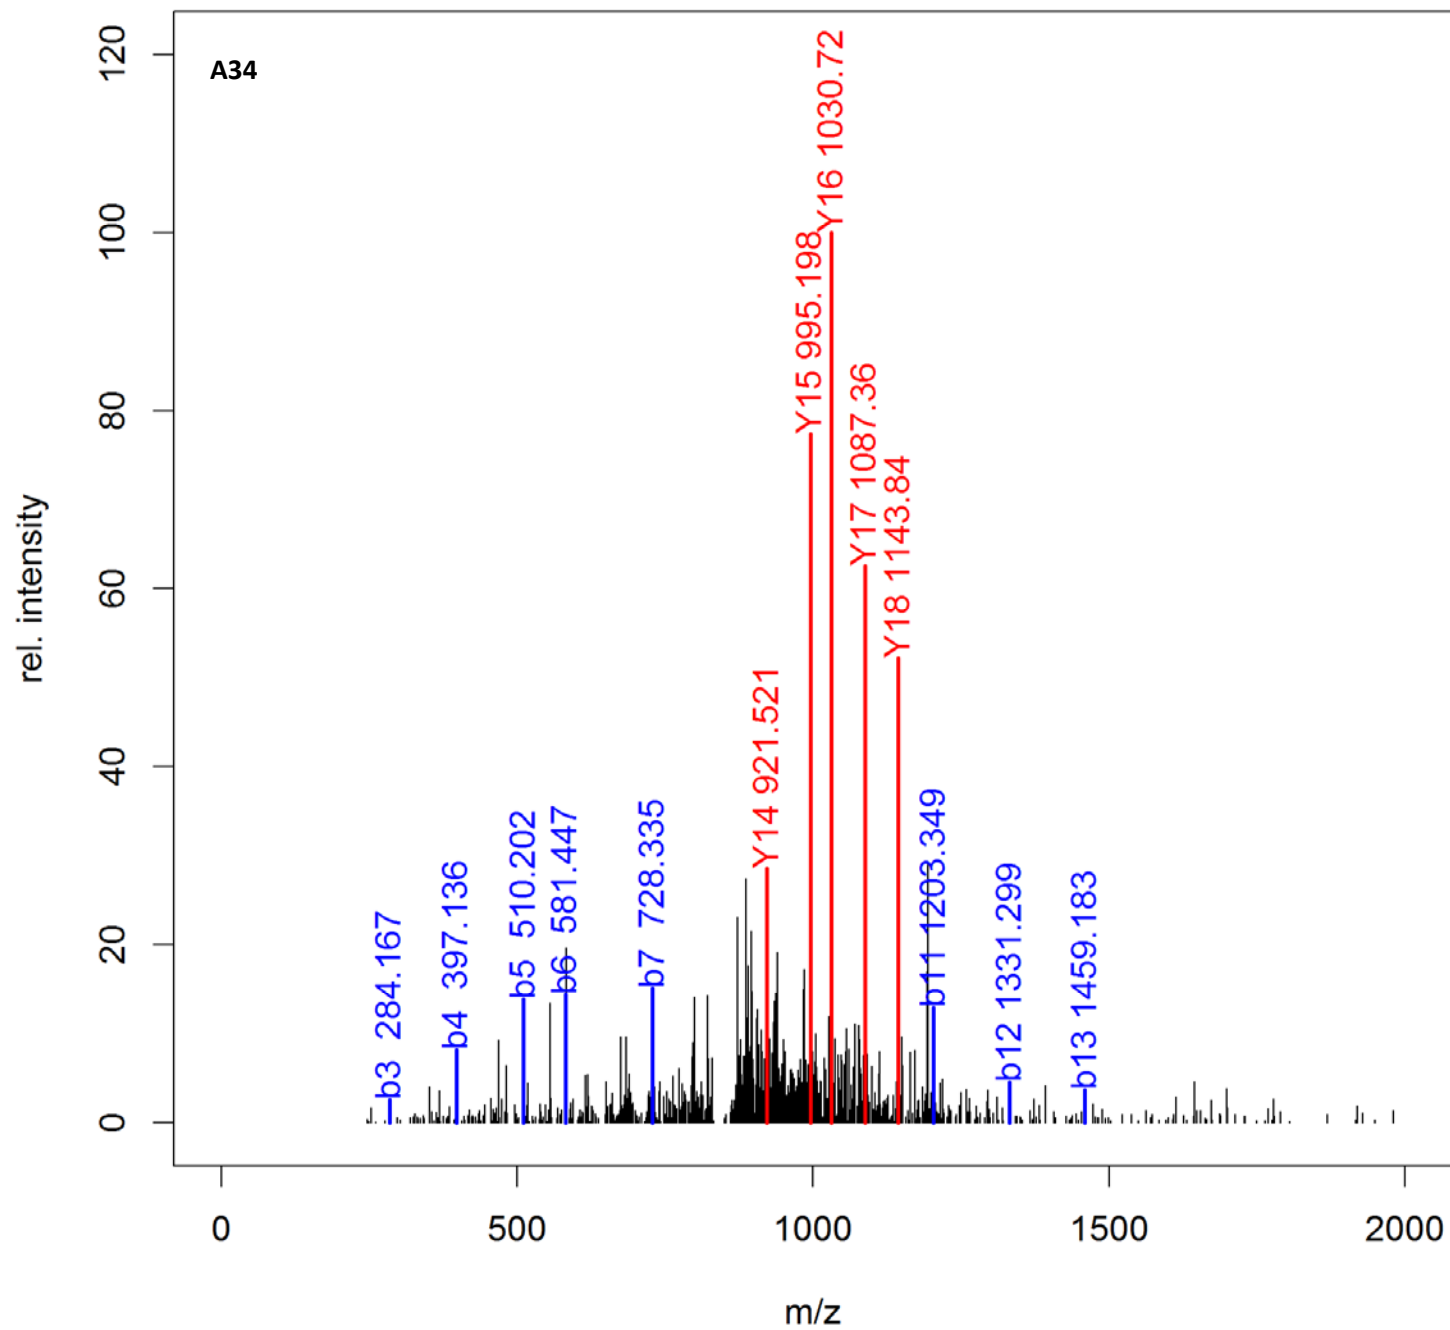

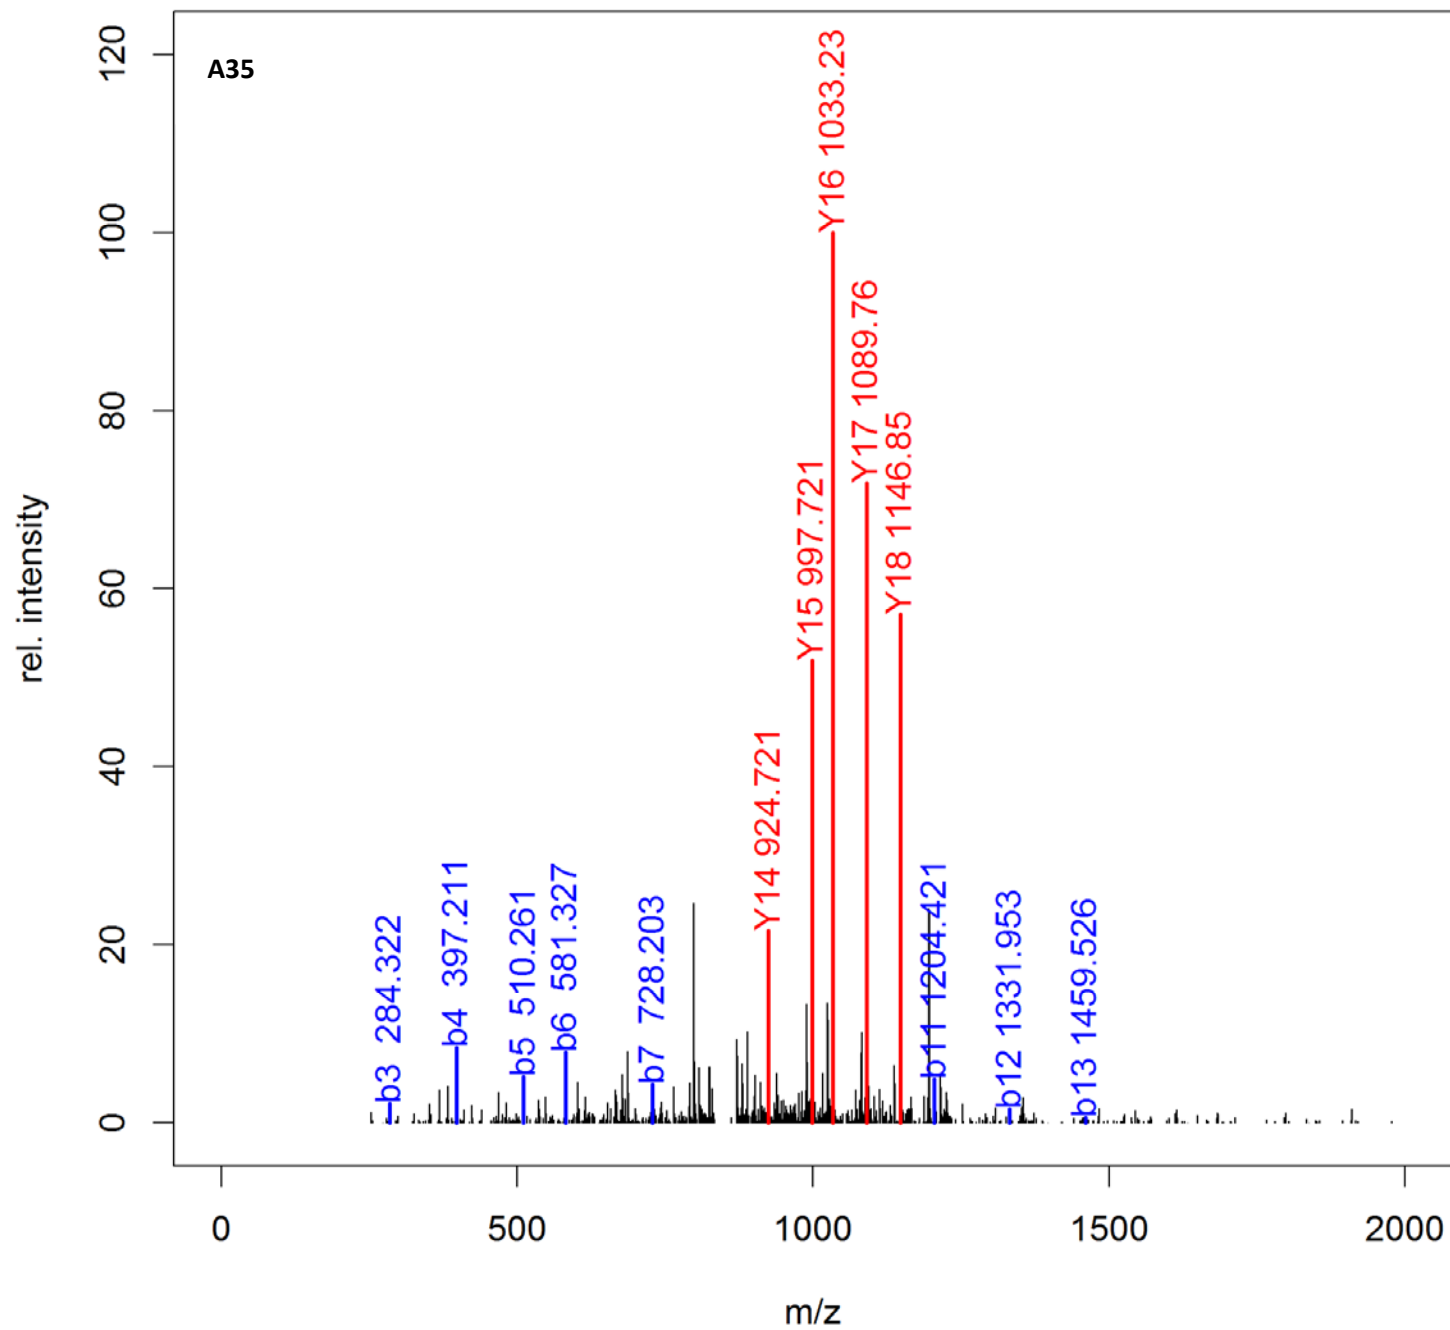

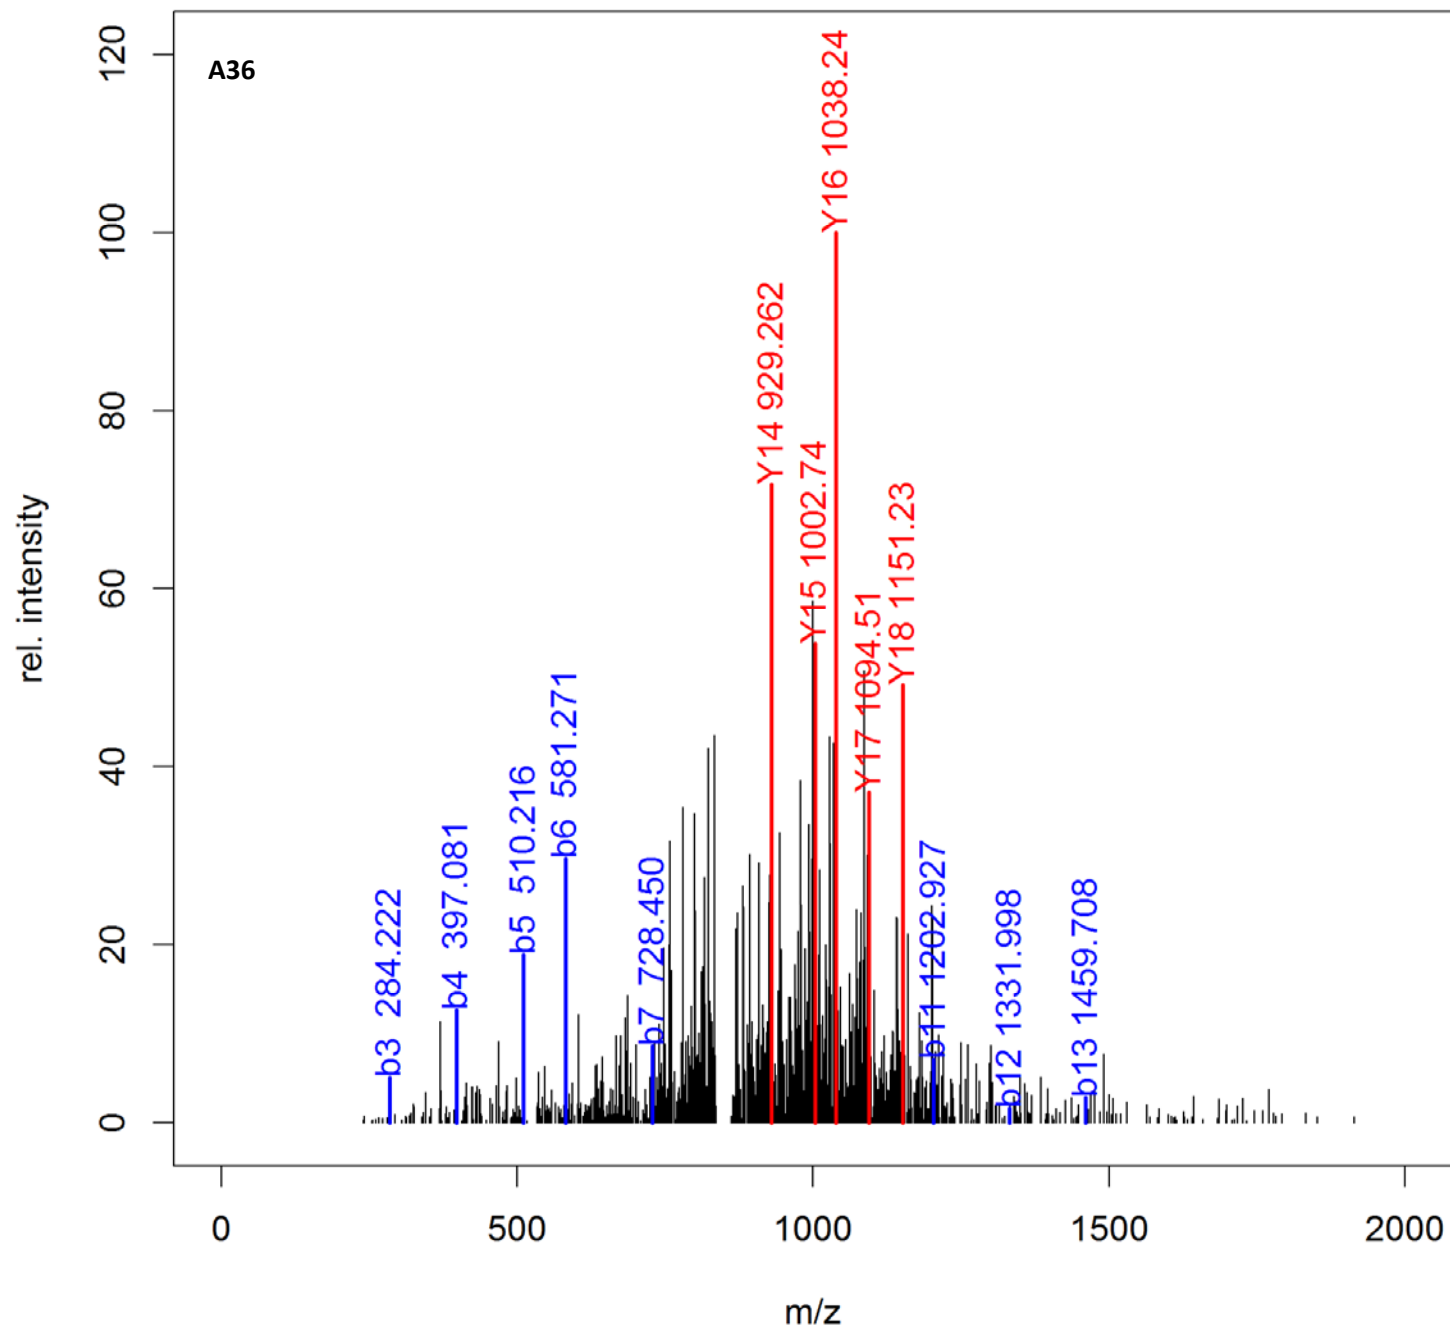

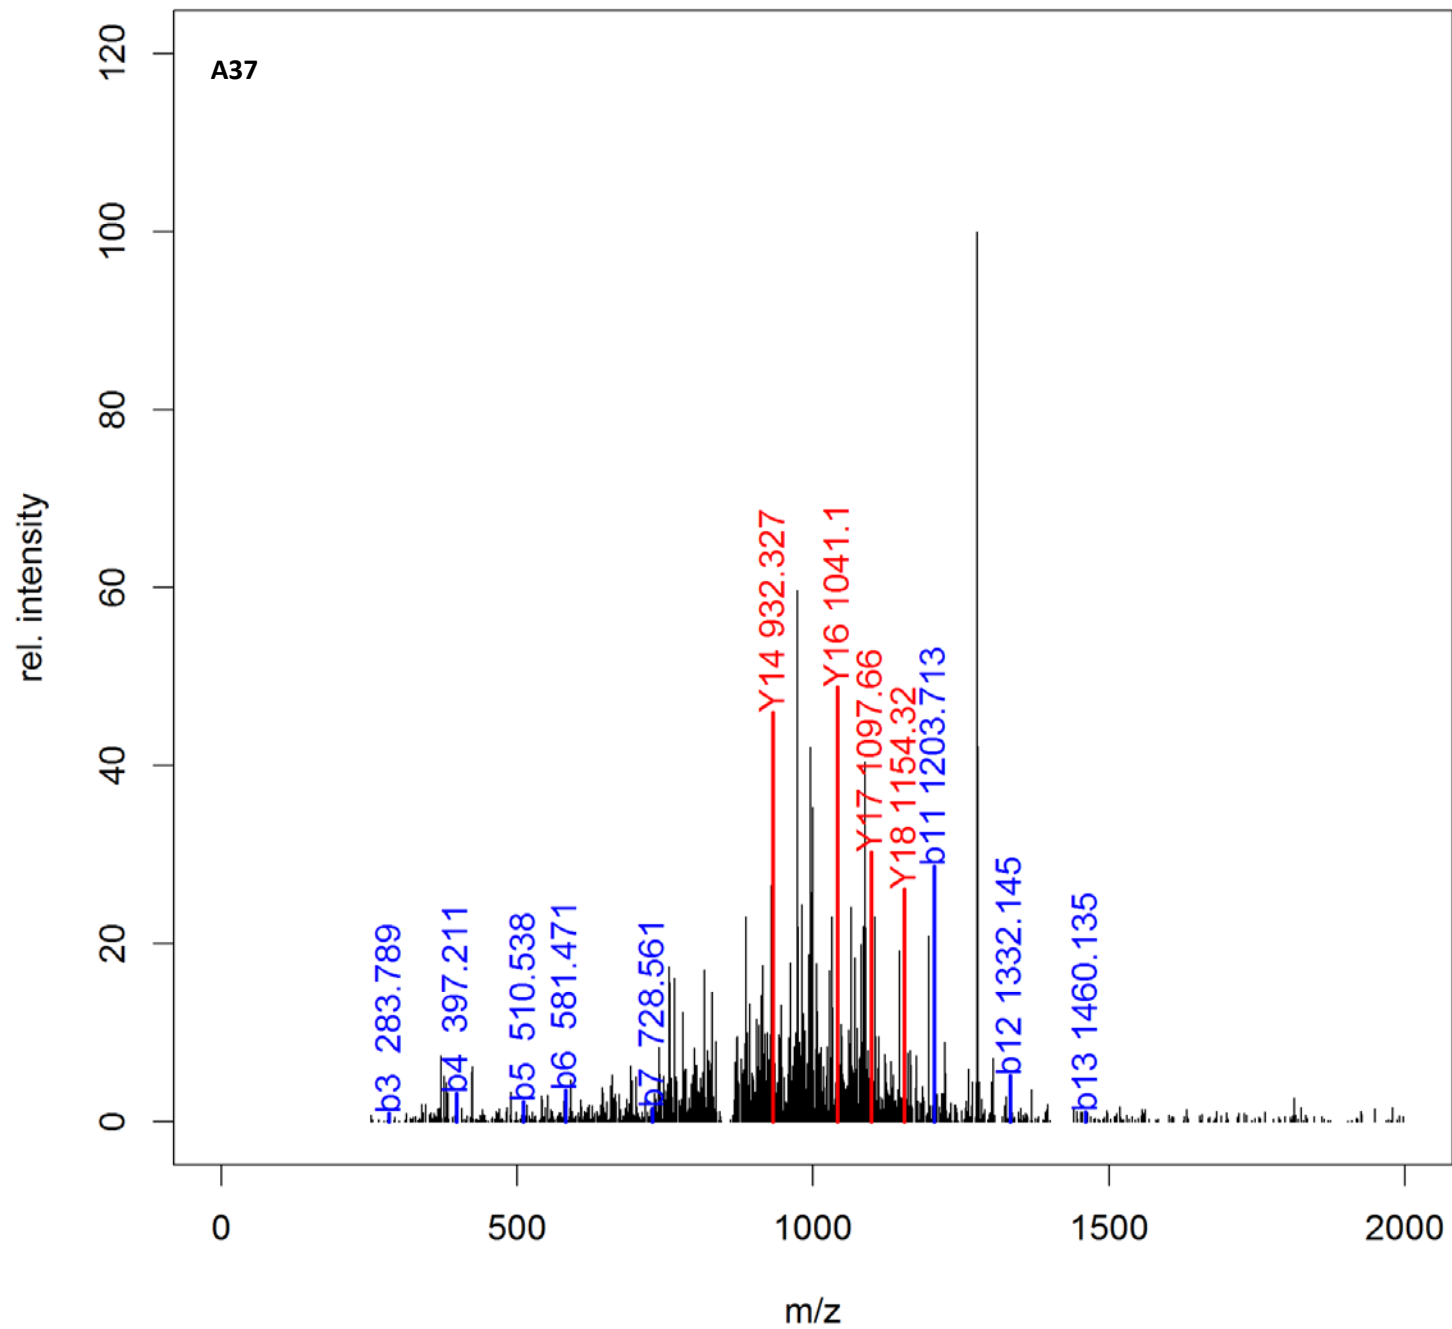

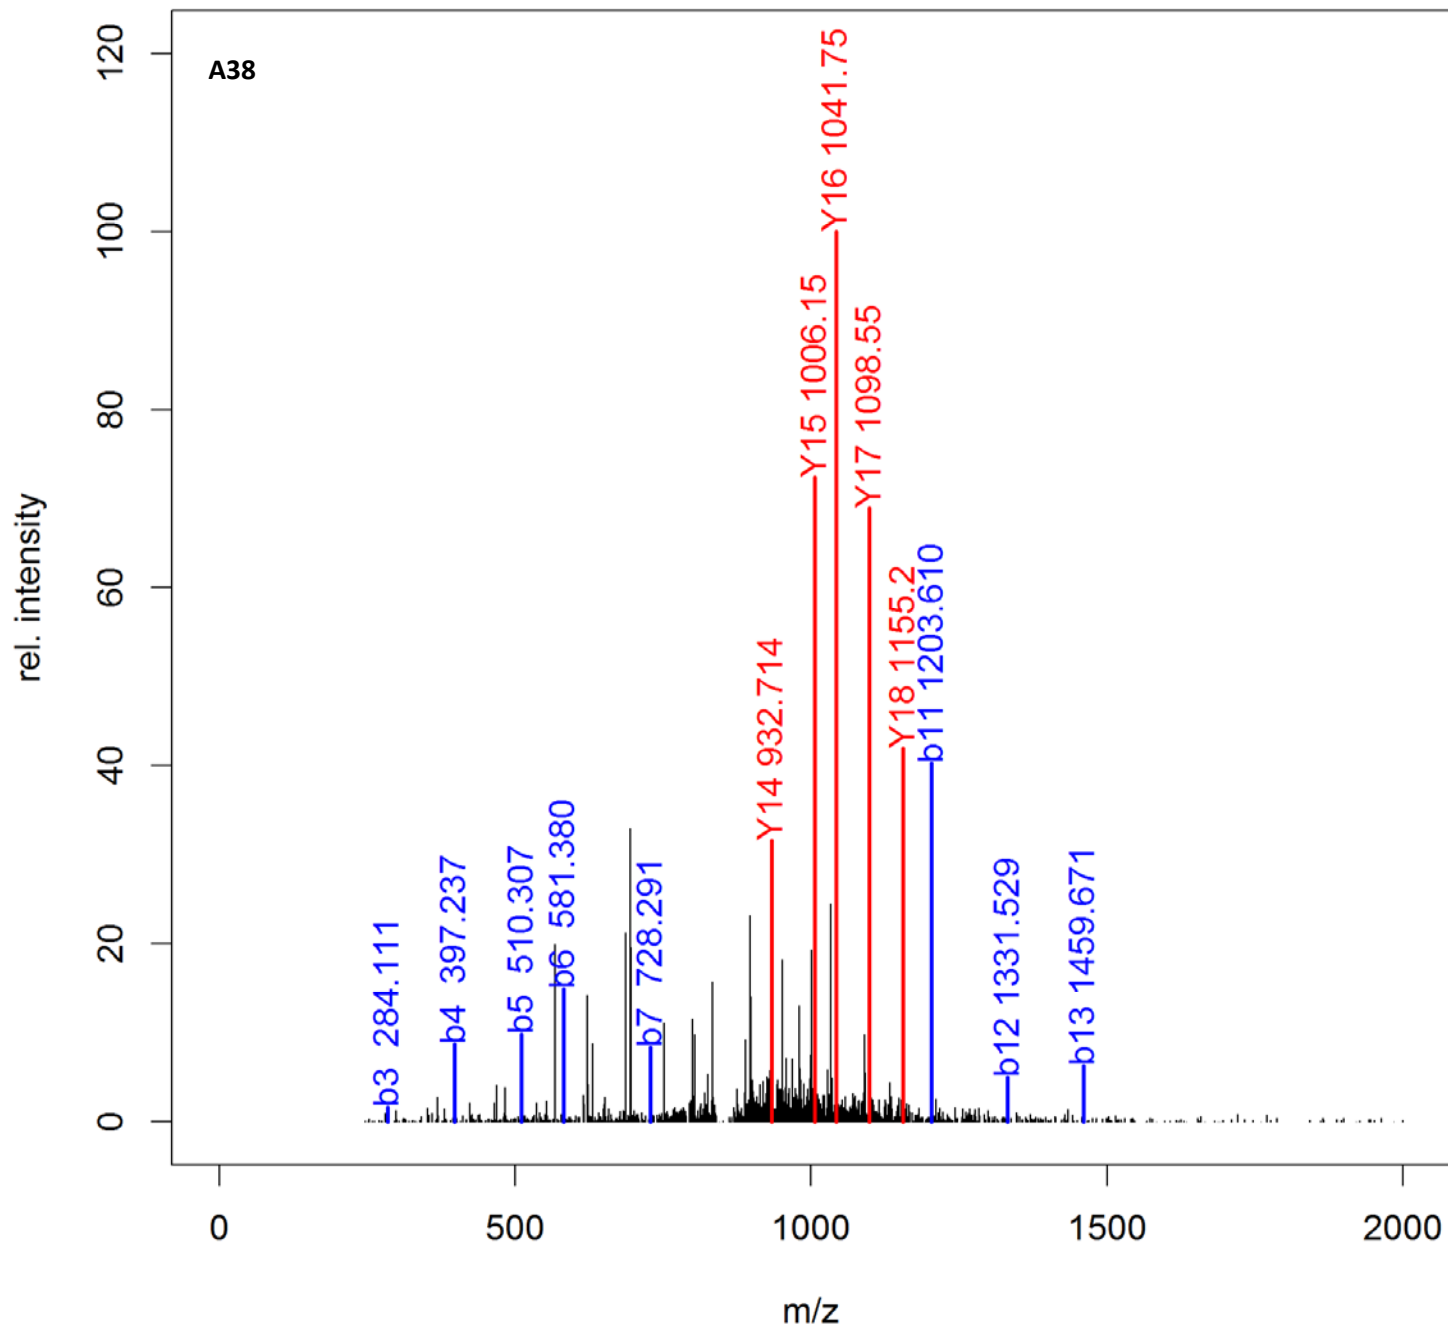

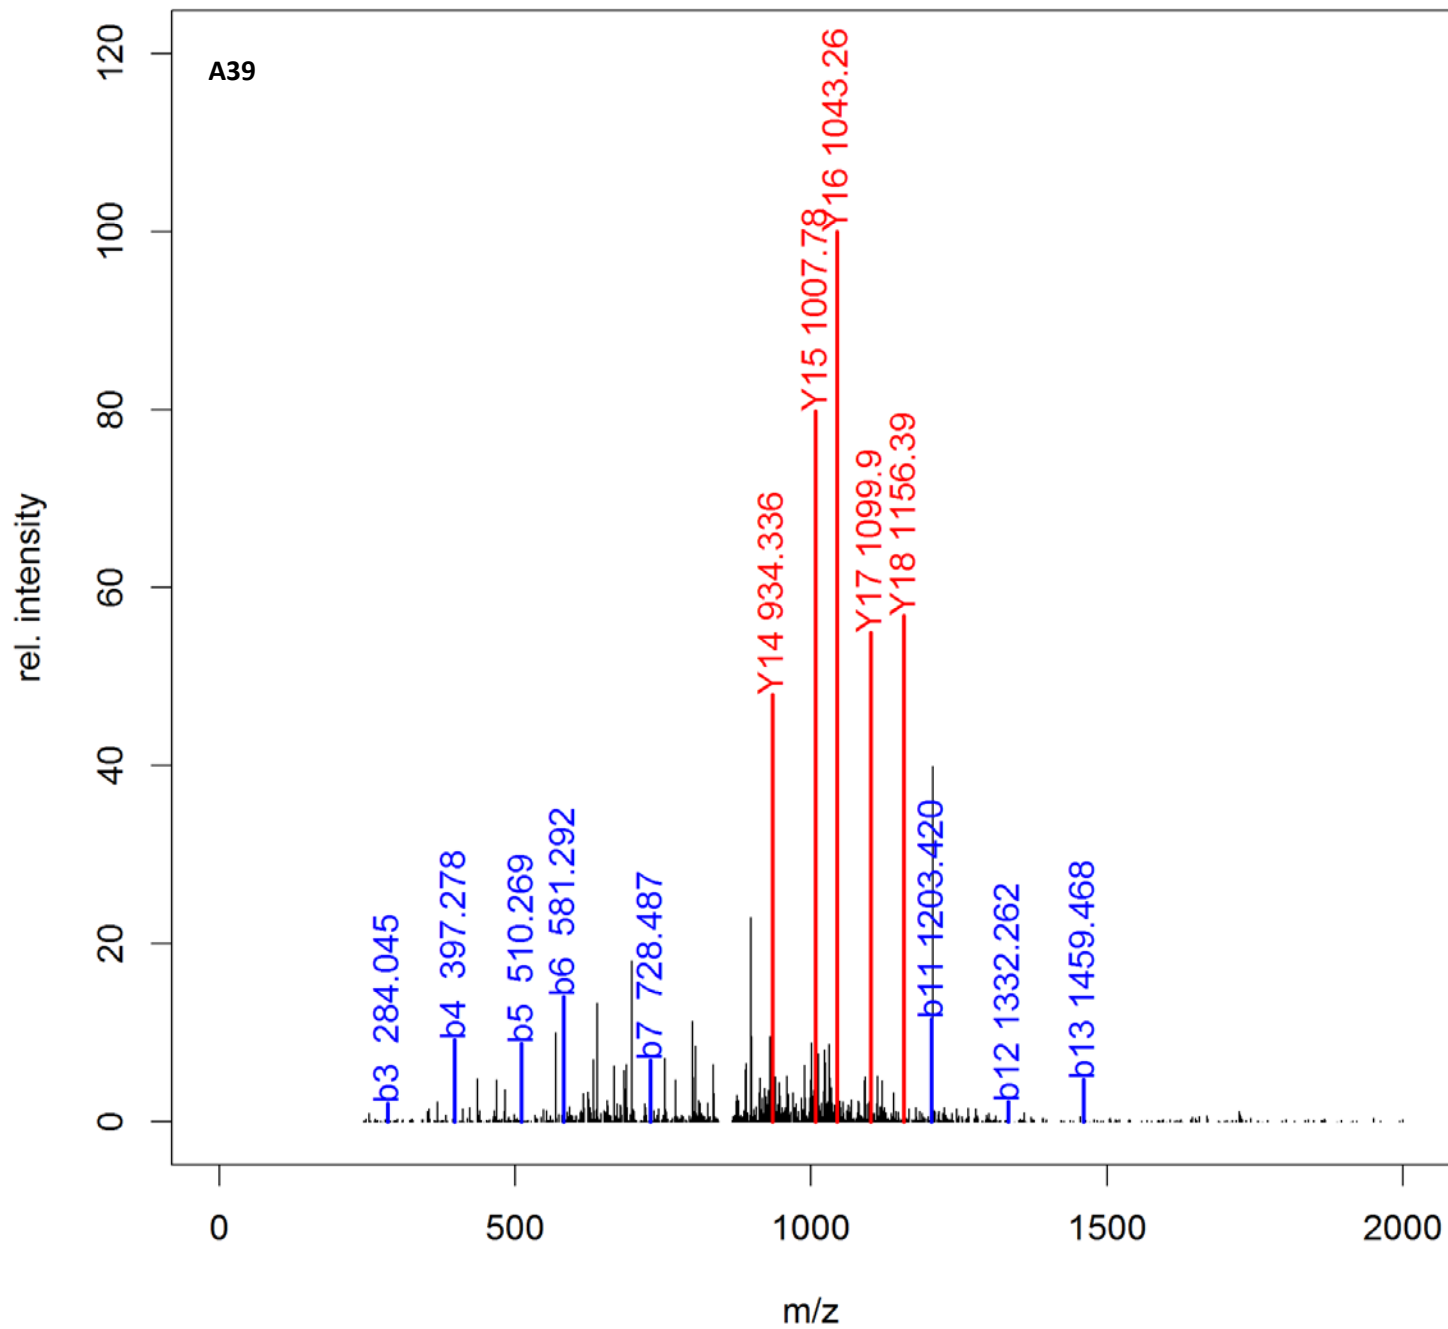

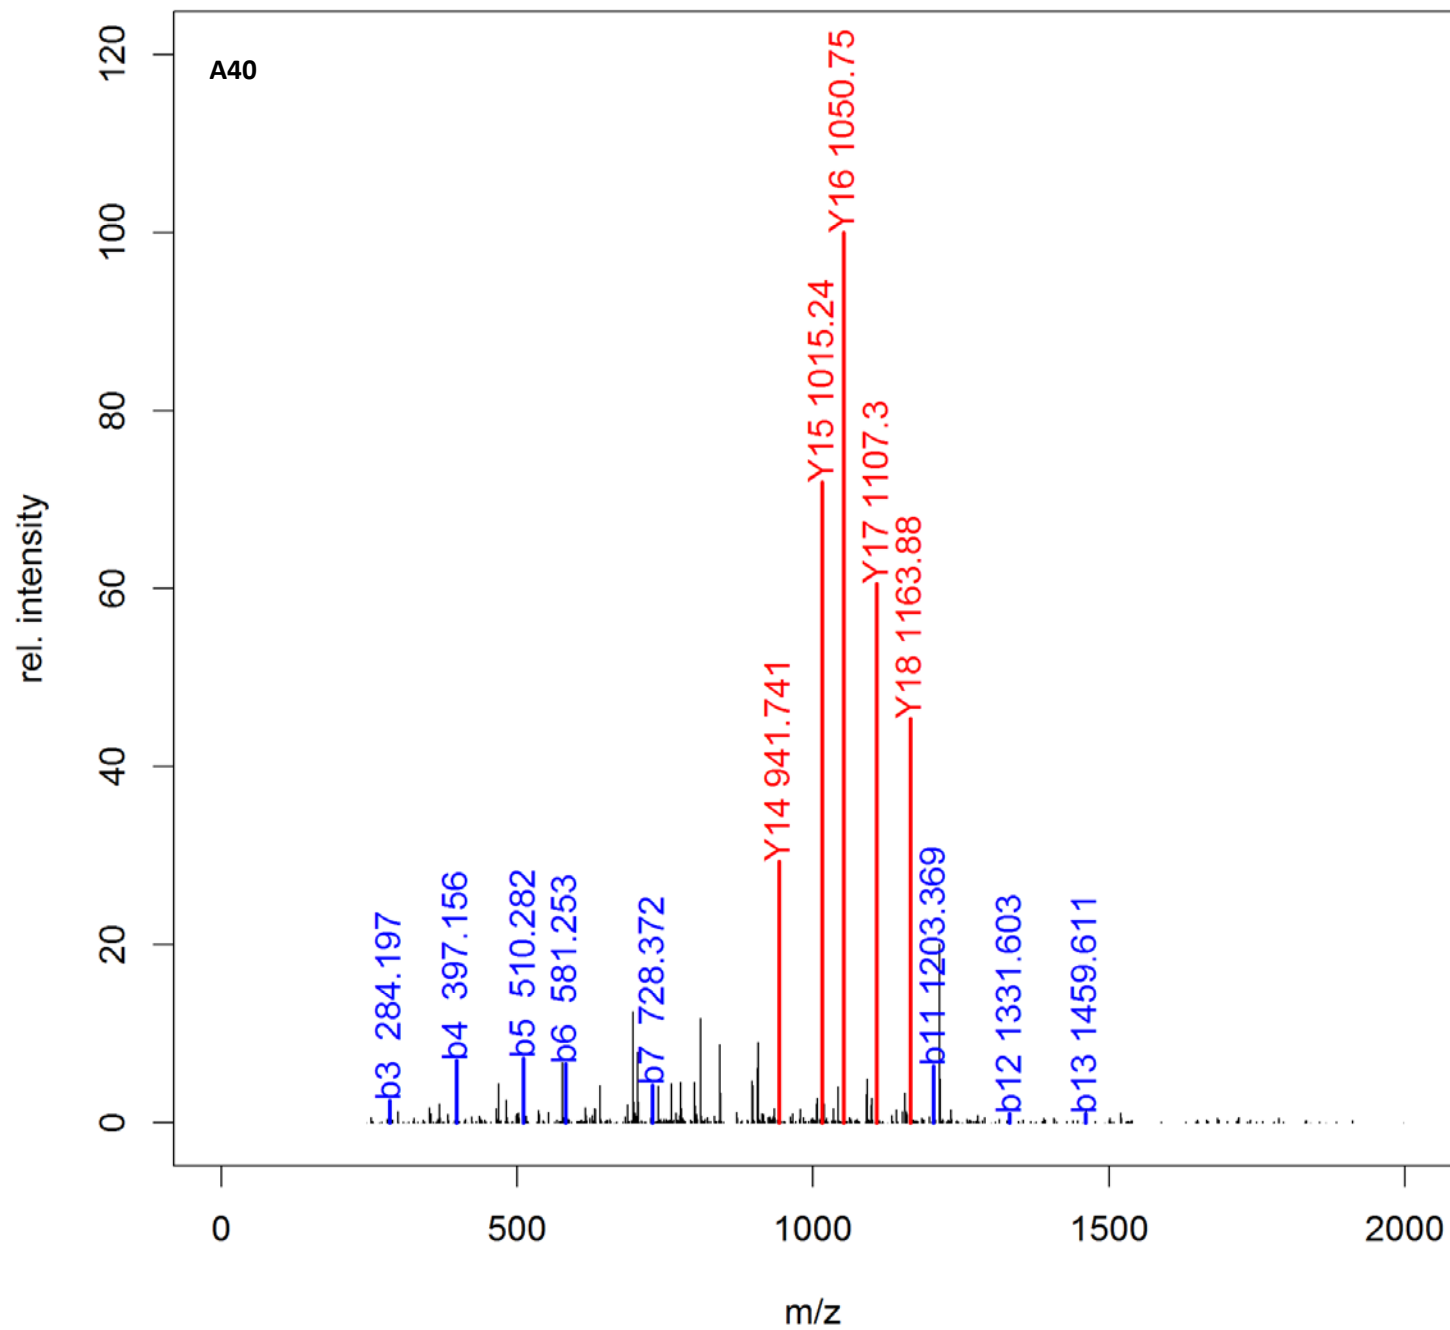



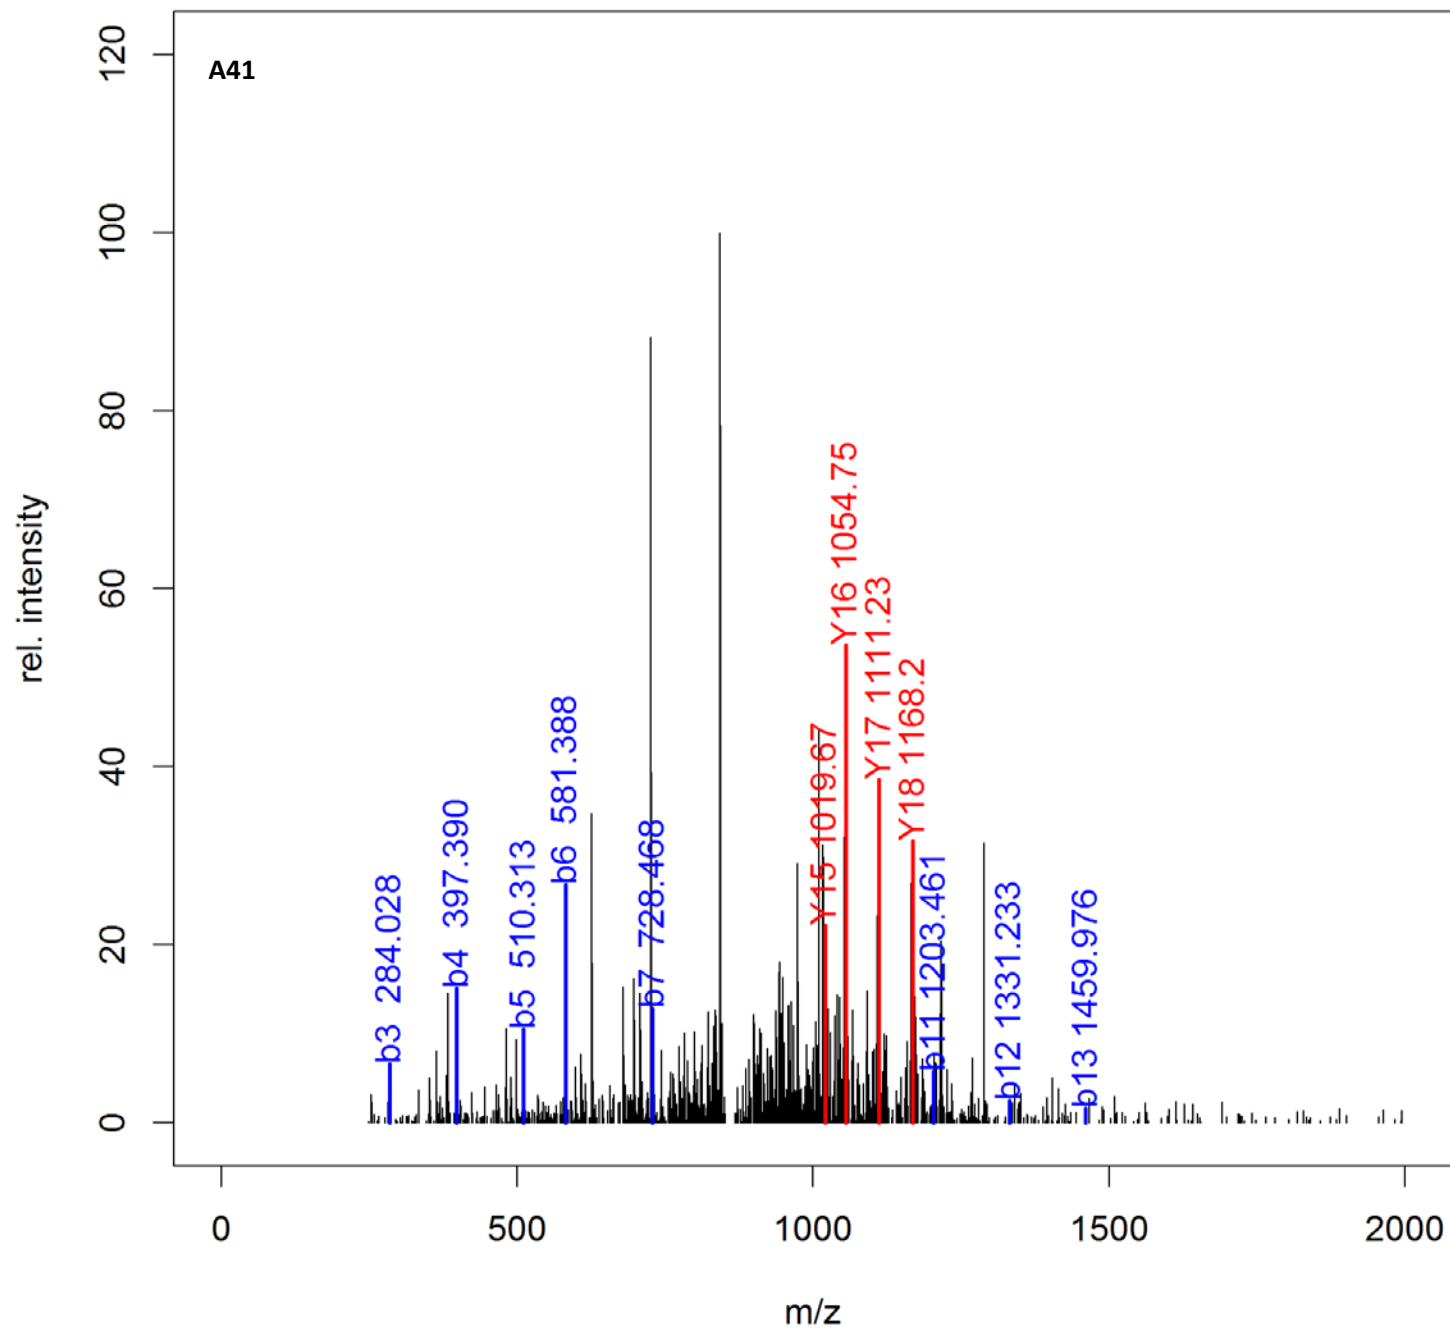

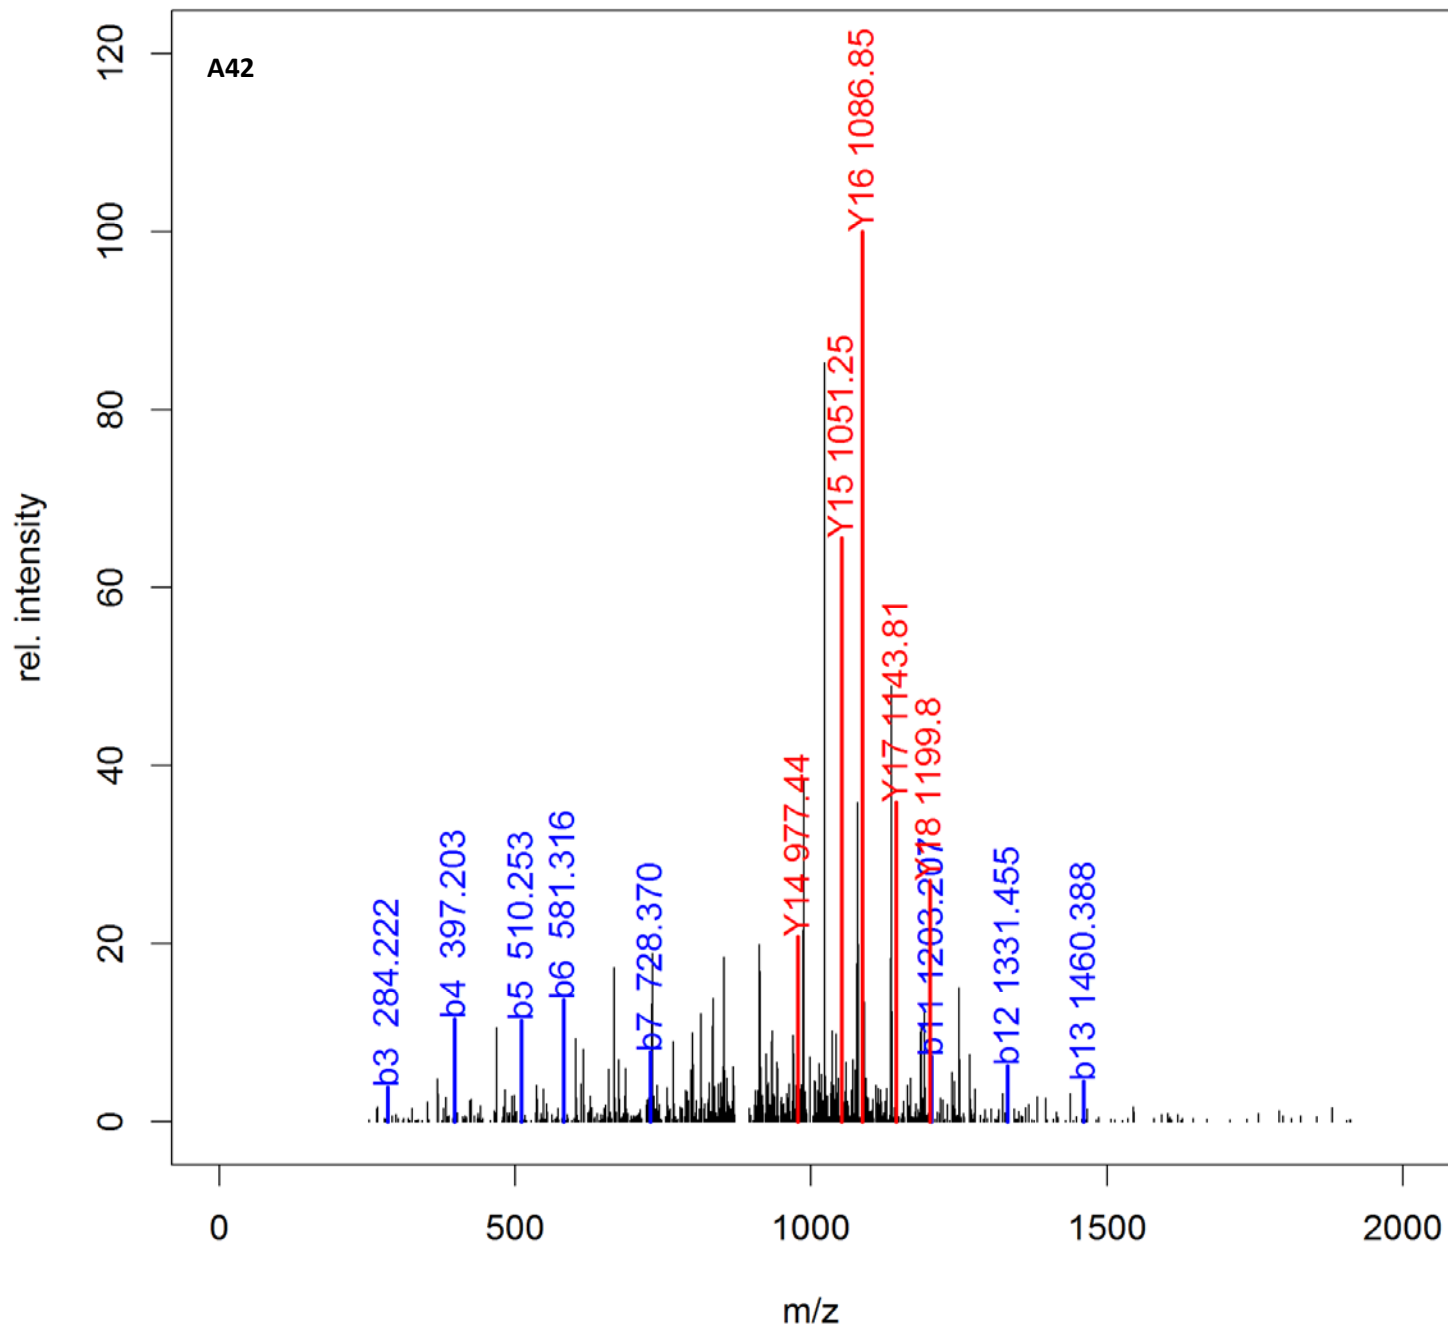

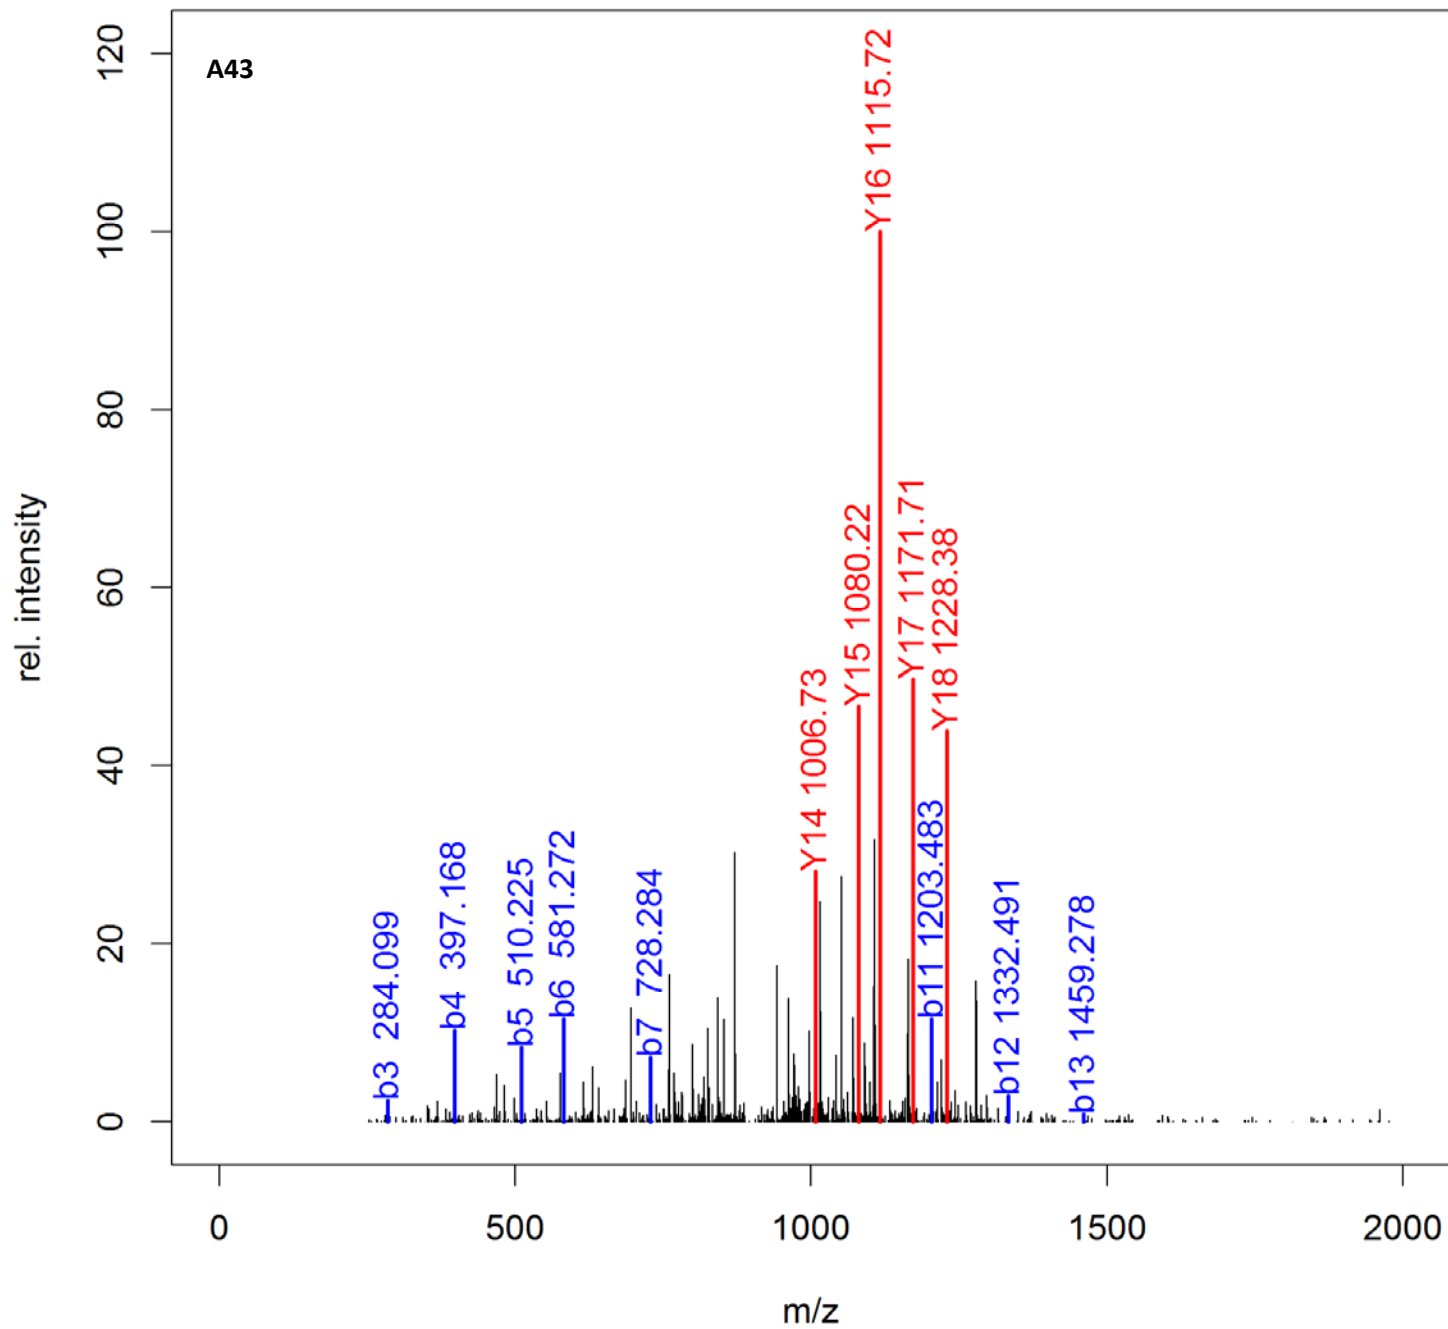

**Figure S2.** Selected ion chromatograms (SICs) of T3 peptides detected in validation samples. SICs are shown in order of increasing retention time. For clarity, each SIC was selected from a plasma sample with a large S/N. Annotations are given in Table 1 of the text.

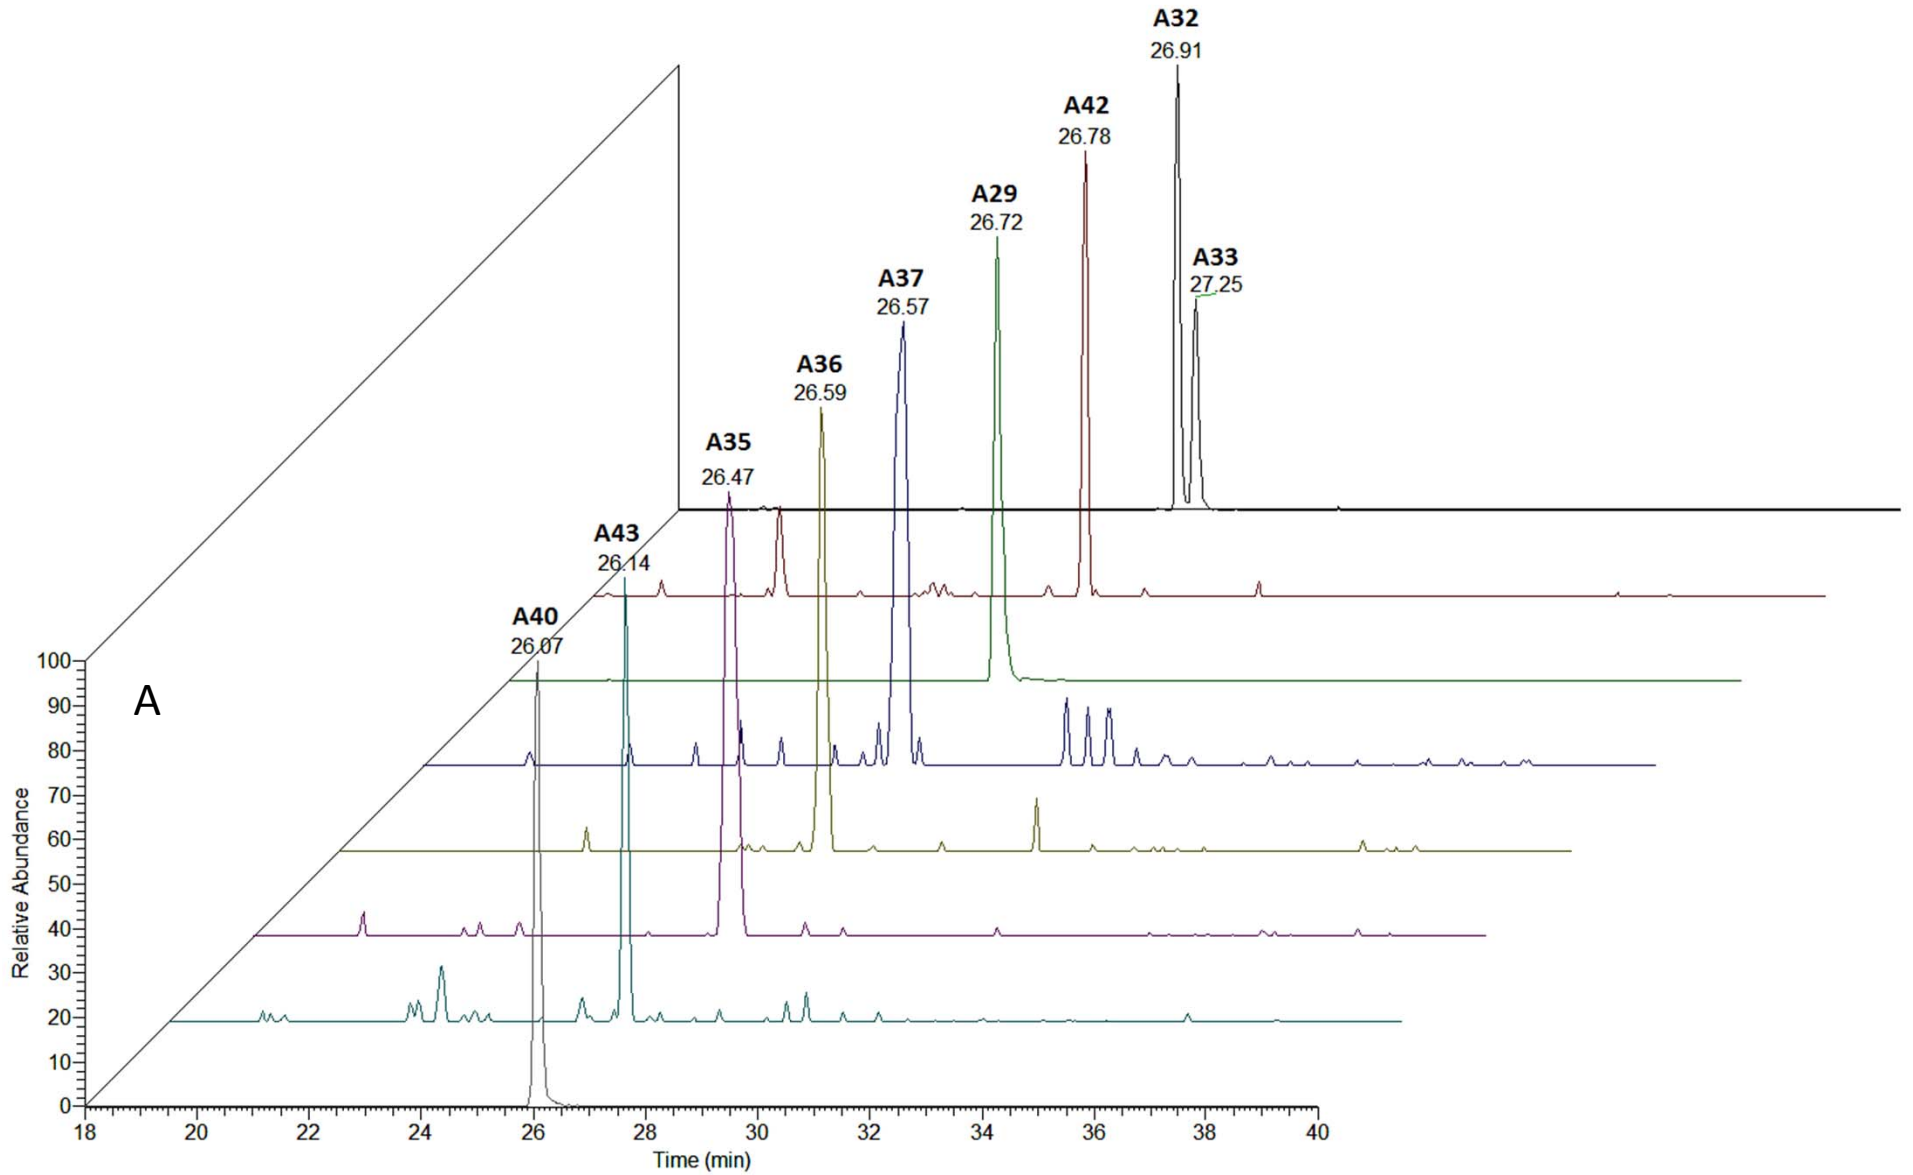

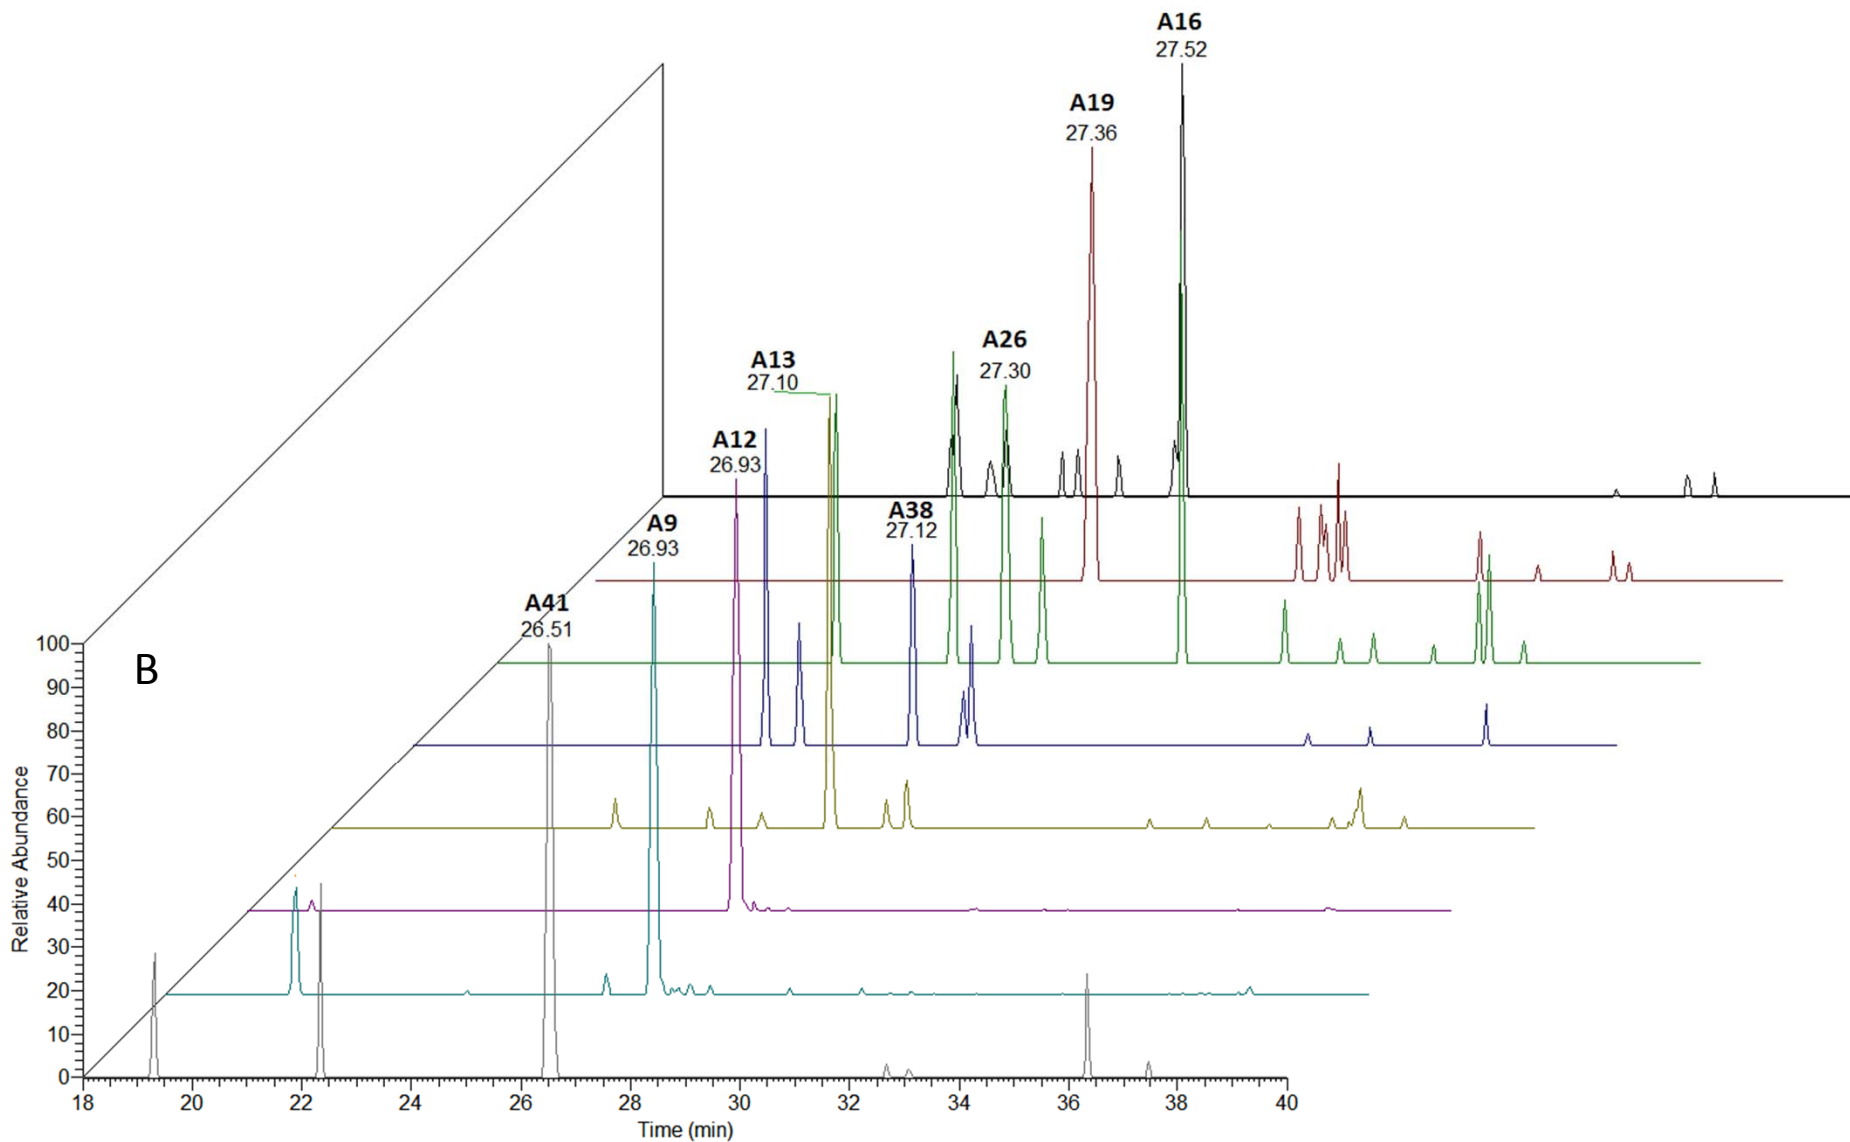

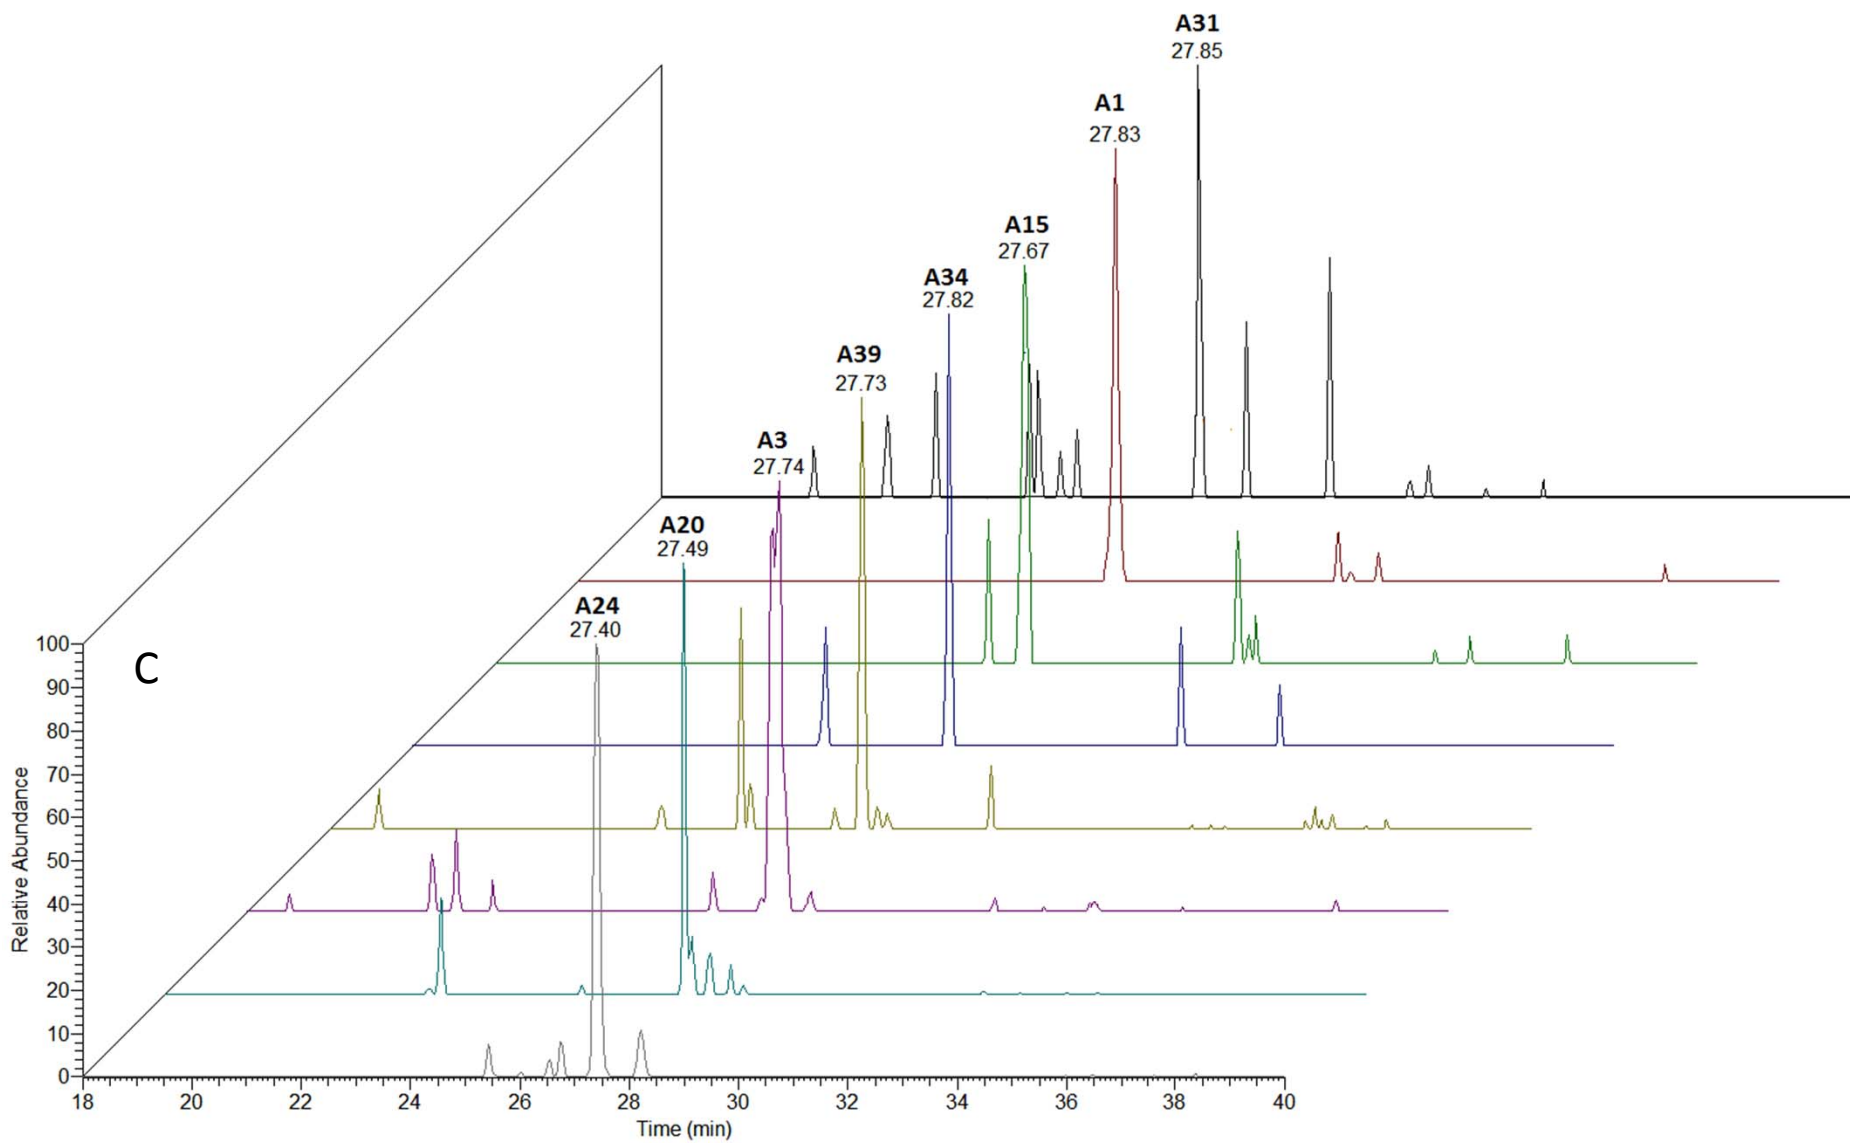

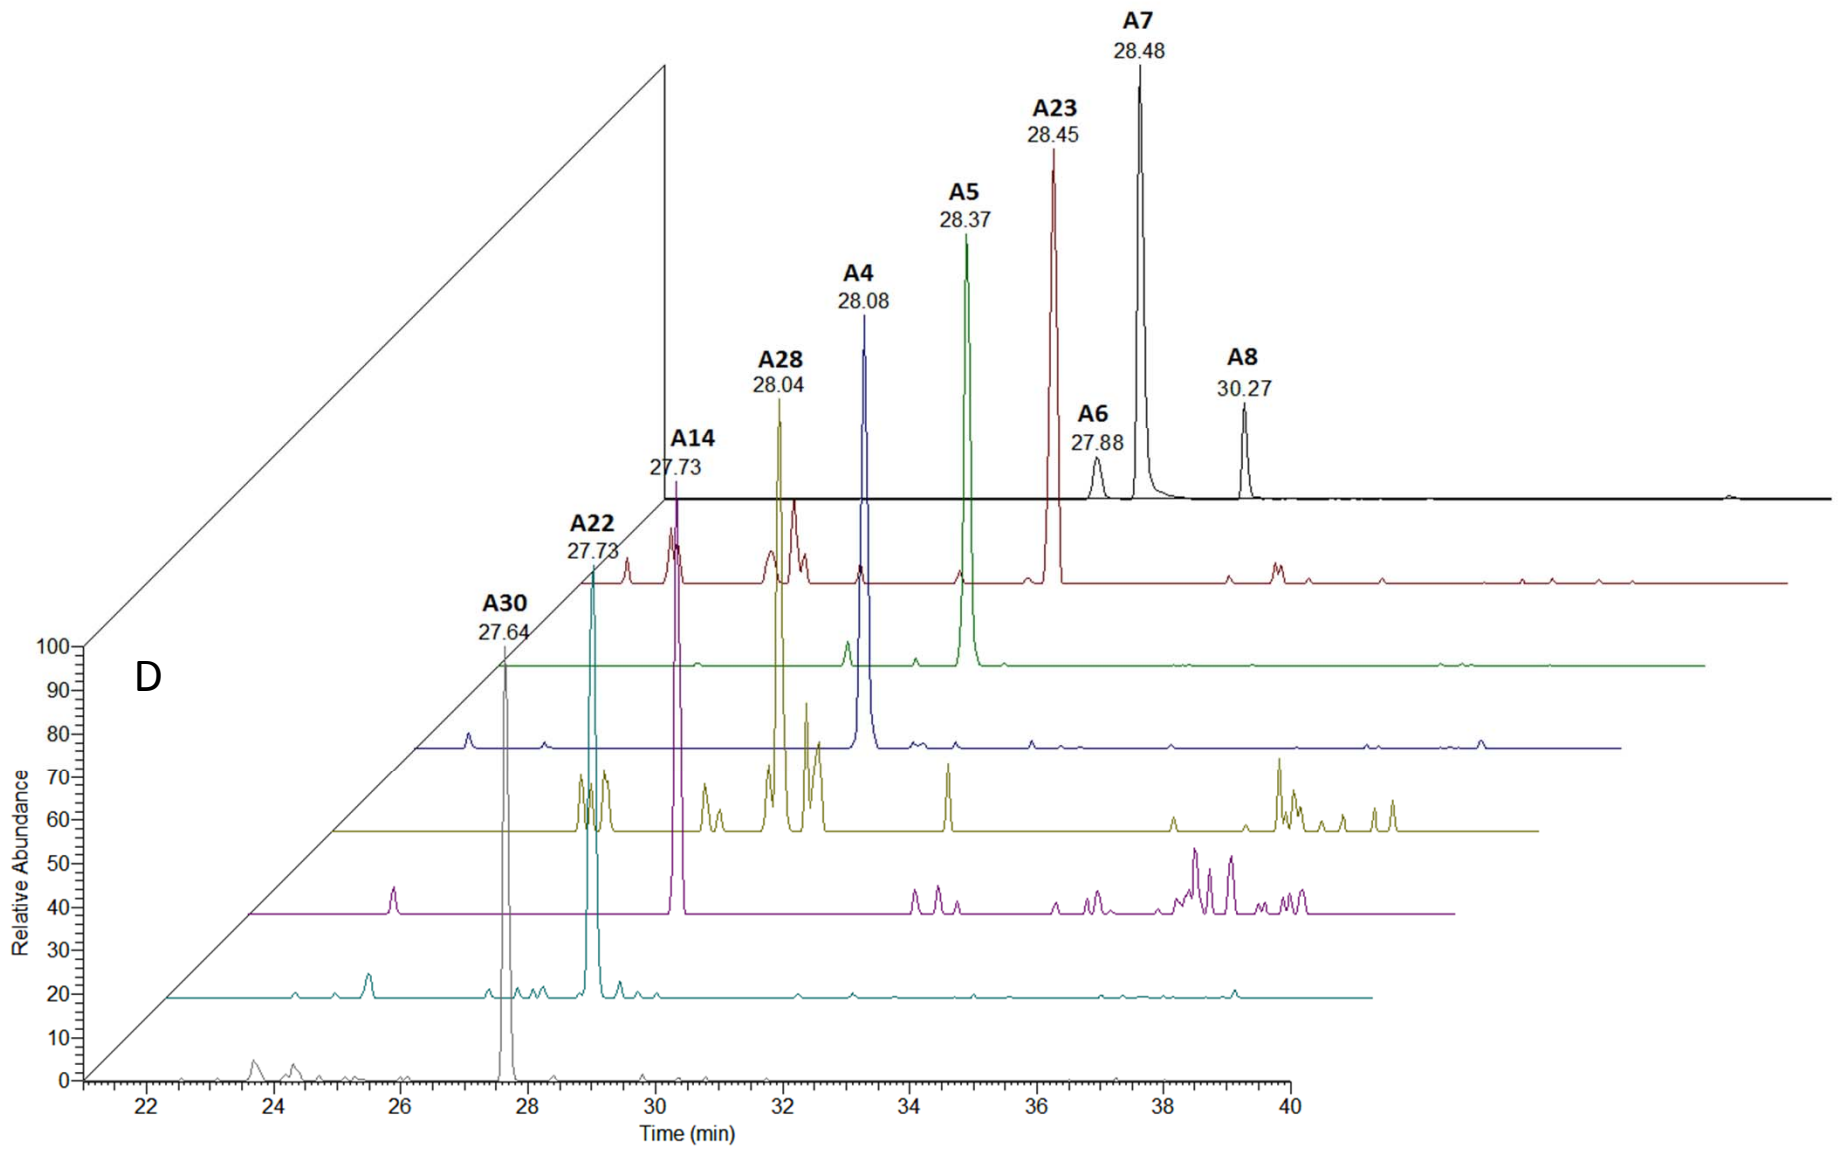



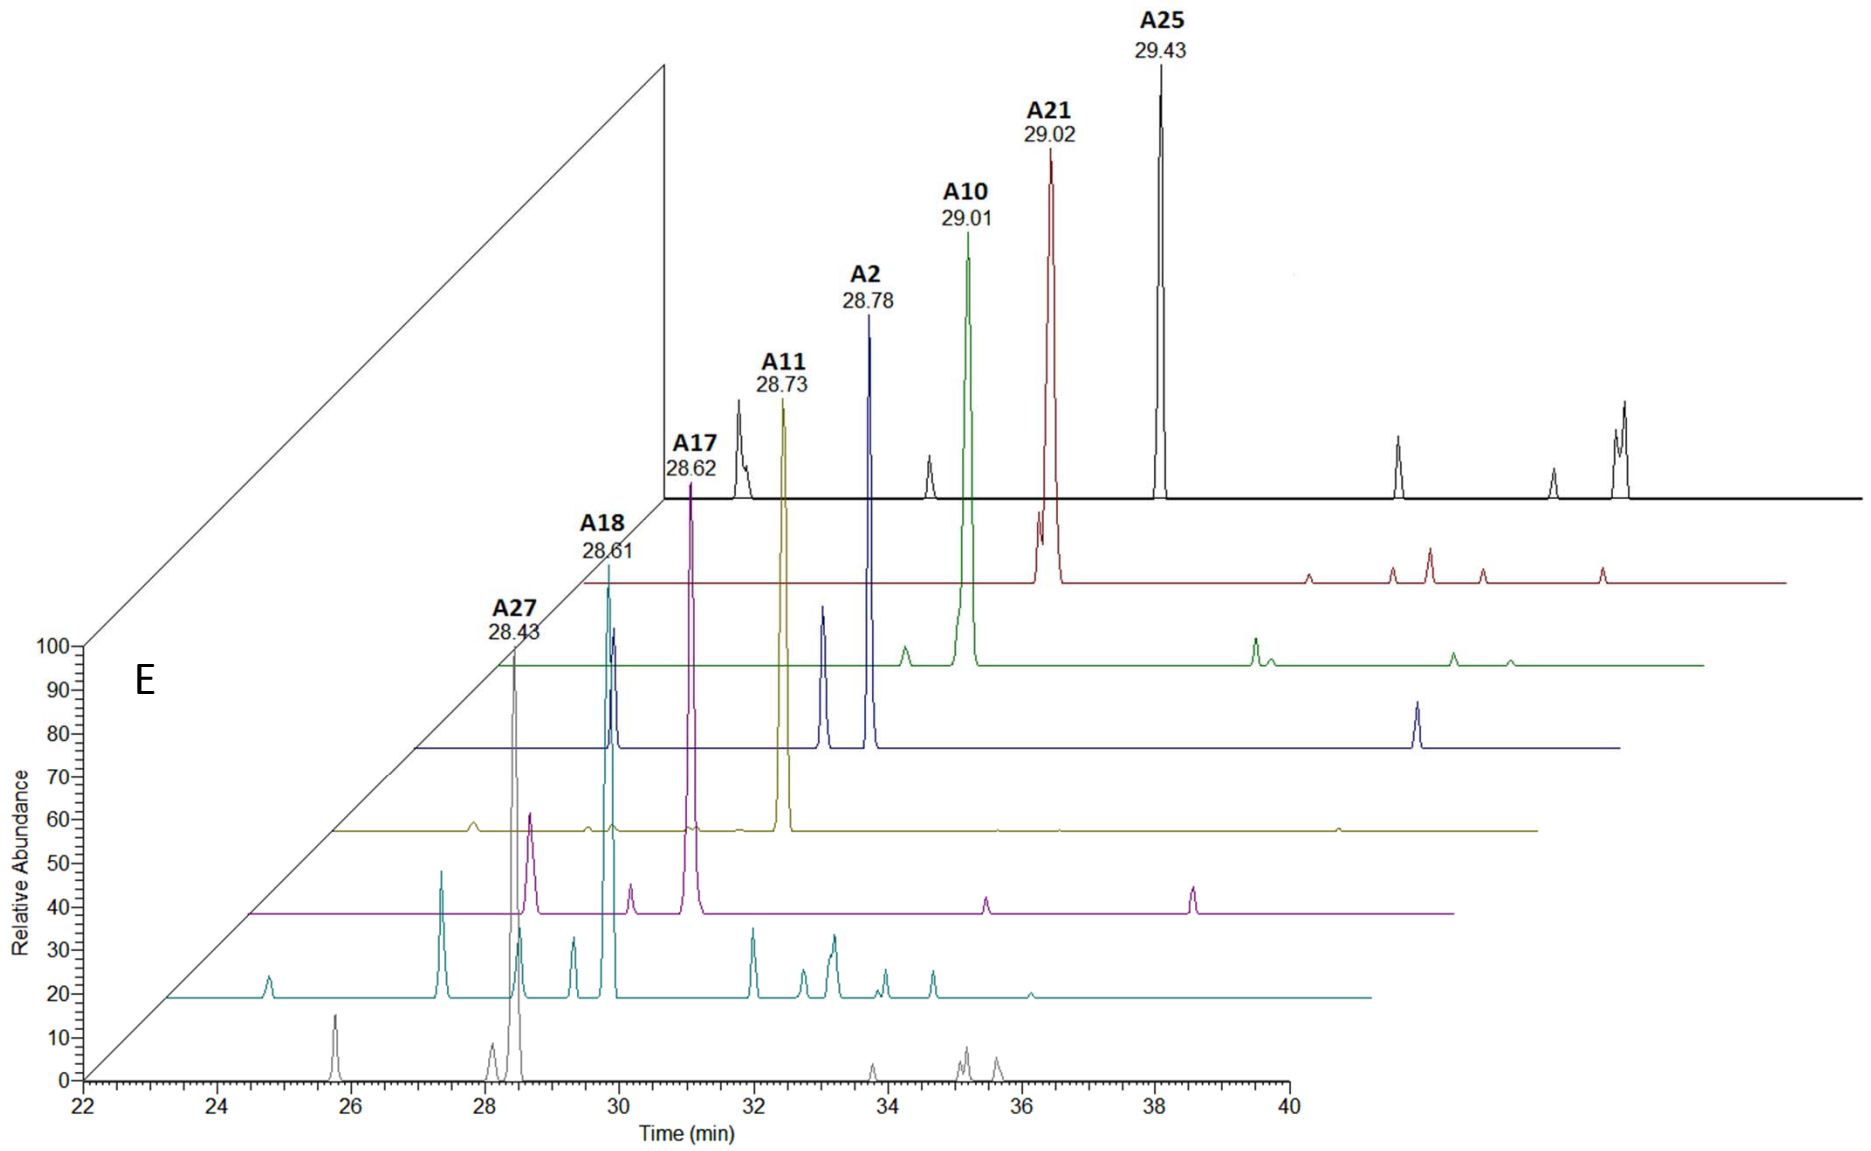

Supplement: NIHMS891799-supplement-Supplemental.pdf [file NIHMS891799-supplement-Supplemental.pdf]
